# Supplementary material for: Phosphoproteomics-Based Modeling Defines the Regulatory Mechanism Underlying Aberrant EGFR Signaling
Source: PubMed Central journal article supplement (PMC2978091; doi:10.1371/journal.pone.0013926), 2010-11-10

## Peptide View

MS/MS Fragmentation of **ADVSDQSKLPGVK**

Found in [gi|71043970|ref|NP\\_001020786.1](#), Ymer protein isoform 2 [Mus musculus]

Match to Query 462: 1483.799848 from(742.907200,2+)

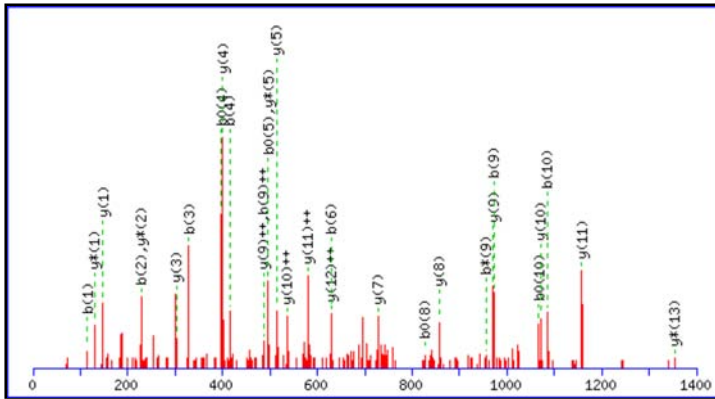

Monoisotopic mass of neutral peptide  $M_r(\text{calc})$ : 1483.7882

Variable modifications:

N-term : N-Acetyl (Protein)

Ions Score: 55 Expect: 0.0049

Matches (**Bold Red**): 30/130 fragment ions using 50 most intense peaks

| #  | b                | b <sup>++</sup> | b*              | b* <sup>++</sup> | b <sup>0</sup>   | b <sup>0++</sup> | Seq. | y                | y <sup>++</sup> | y*               | y* <sup>++</sup> | y <sup>0</sup> | y <sup>0++</sup> | #  |
|----|------------------|-----------------|-----------------|------------------|------------------|------------------|------|------------------|-----------------|------------------|------------------|----------------|------------------|----|
| 1  | <b>114.0549</b>  | 57.5311         |                 |                  |                  |                  | A    |                  |                 |                  |                  |                |                  | 14 |
| 2  | <b>229.0819</b>  | 115.0446        |                 |                  | 211.0713         | 106.0393         | D    | 1371.7478        | 686.3775        | <b>1354.7212</b> | 677.8643         | 1353.7372      | 677.3723         | 13 |
| 3  | <b>328.1503</b>  | 164.5788        |                 |                  | 310.1397         | 155.5735         | V    | 1256.7209        | <b>628.8641</b> | 1239.6943        | 620.3508         | 1238.7103      | 619.8588         | 12 |
| 4  | <b>415.1823</b>  | 208.0948        |                 |                  | <b>397.1718</b>  | 199.0895         | S    | <b>1157.6524</b> | <b>579.3299</b> | 1140.6259        | 570.8166         | 1139.6419      | 570.3246         | 11 |
| 5  | 514.2507         | 257.6290        |                 |                  | <b>496.2402</b>  | 248.6237         | V    | <b>1070.6204</b> | <b>535.8138</b> | 1053.5939        | 527.3006         | 1052.6098      | 526.8086         | 10 |
| 6  | <b>629.2777</b>  | 315.1425        |                 |                  | 611.2671         | 306.1372         | D    | <b>971.5520</b>  | <b>486.2796</b> | 954.5255         | 477.7664         | 953.5414       | 477.2744         | 9  |
| 7  | 757.3363         | 379.1718        | 740.3097        | 370.6585         | 739.3257         | 370.1665         | Q    | <b>856.5251</b>  | 428.7662        | 839.4985         | 420.2529         | 838.5145       | 419.7609         | 8  |
| 8  | 844.3683         | 422.6878        | 827.3417        | 414.1745         | <b>826.3577</b>  | 413.6825         | S    | <b>728.4665</b>  | 364.7369        | 711.4399         | 356.2236         | 710.4559       | 355.7316         | 7  |
| 9  | <b>972.4632</b>  | <b>486.7353</b> | <b>955.4367</b> | 478.2220         | 954.4527         | 477.7300         | K    | 641.4345         | 321.2209        | 624.4079         | 312.7076         |                |                  | 6  |
| 10 | <b>1085.5473</b> | 543.2773        | 1068.5208       | 534.7640         | <b>1067.5367</b> | 534.2720         | L    | <b>513.3395</b>  | 257.1734        | <b>496.3129</b>  | 248.6601         |                |                  | 5  |
| 11 | 1182.6001        | 591.8037        | 1165.5735       | 583.2904         | 1164.5895        | 582.7984         | P    | <b>400.2554</b>  | 200.6314        | 383.2289         | 192.1181         |                |                  | 4  |
| 12 | 1239.6215        | 620.3144        | 1222.5950       | 611.8011         | 1221.6110        | 611.3091         | G    | <b>303.2027</b>  | 152.1050        | 286.1761         | 143.5917         |                |                  | 3  |
| 13 | 1338.6899        | 669.8486        | 1321.6634       | 661.3353         | 1320.6794        | 660.8433         | V    | 246.1812         | 123.5942        | <b>229.1547</b>  | 115.0810         |                |                  | 2  |
| 14 |                  |                 |                 |                  |                  |                  | K    | <b>147.1128</b>  | 74.0600         | <b>130.0863</b>  | 65.5468          |                |                  | 1  |

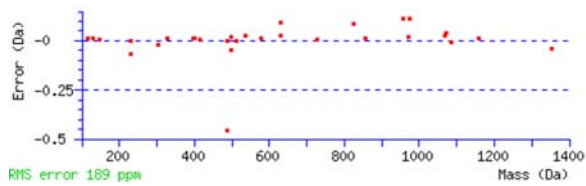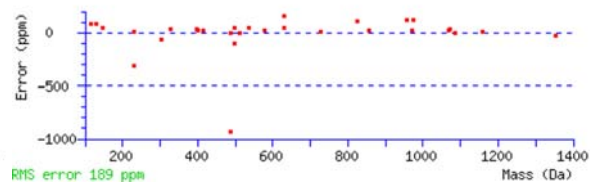

## Peptide View

MS/MS Fragmentation of **ALMVEWTEDEFKNDPQLSLISAMIK**

Found in [gi|6755668|ref|NP\\_035614.1](#), signal transducing adaptor molecule (SH3 domain and ITAM motif) 1 [Mus musculus]

Match to Query 891: 2778.630072 from(927.217300,3+)

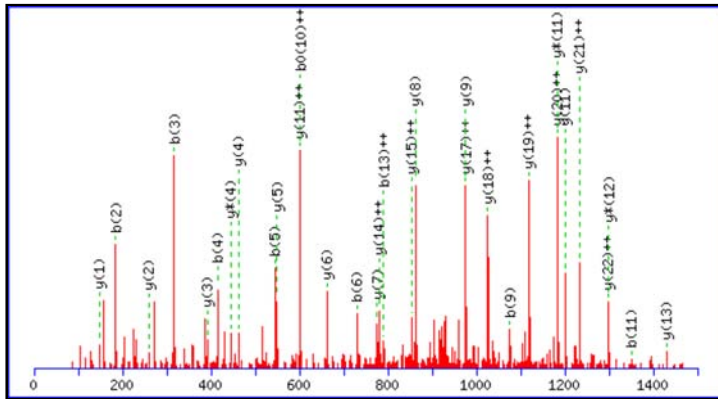

Monoisotopic mass of neutral peptide  $M_r(\text{calc})$ : 2778.3972

Ions Score: 53 Expect: 0.037

Matches (Bold Red): 32/240 fragment ions using 88 most intense peaks

| #  | b                | b <sup>++</sup> | b*        | b* <sup>++</sup> | b <sup>0</sup> | b <sup>0++</sup> | Seq. | y                | y <sup>++</sup>  | y*               | y* <sup>++</sup> | y <sup>0</sup> | y <sup>0++</sup> | #  |
|----|------------------|-----------------|-----------|------------------|----------------|------------------|------|------------------|------------------|------------------|------------------|----------------|------------------|----|
| 1  | 72.0444          | 36.5258         |           |                  |                |                  | A    |                  |                  |                  |                  |                |                  | 24 |
| 2  | <b>185.1284</b>  | 93.0679         |           |                  |                |                  | L    | 2708.3673        | 1354.6873        | 2691.3408        | 1346.1740        | 2690.3568      | 1345.6820        | 23 |
| 3  | <b>316.1689</b>  | 158.5881        |           |                  |                |                  | M    | 2595.2833        | <b>1298.1453</b> | 2578.2567        | 1289.6320        | 2577.2727      | 1289.1400        | 22 |
| 4  | <b>415.2373</b>  | 208.1223        |           |                  |                |                  | V    | 2464.2428        | <b>1232.6250</b> | 2447.2162        | 1224.1118        | 2446.2322      | 1223.6198        | 21 |
| 5  | <b>544.2799</b>  | 272.6436        |           |                  | 526.2694       | 263.6383         | E    | 2365.1744        | <b>1183.0908</b> | 2348.1478        | 1174.5776        | 2347.1638      | 1174.0855        | 20 |
| 6  | <b>730.3592</b>  | 365.6833        |           |                  | 712.3487       | 356.6780         | W    | 2236.1318        | <b>1118.5695</b> | 2219.1052        | 1110.0563        | 2218.1212      | 1109.5643        | 19 |
| 7  | 831.4069         | 416.2071        |           |                  | 813.3964       | 407.2018         | T    | 2050.0525        | <b>1025.5299</b> | 2033.0259        | 1017.0166        | 2032.0419      | 1016.5246        | 18 |
| 8  | 946.4339         | 473.7206        |           |                  | 928.4233       | 464.7153         | D    | 1949.0048        | <b>975.0060</b>  | 1931.9783        | 966.4928         | 1930.9942      | 966.0008         | 17 |
| 9  | <b>1075.4764</b> | 538.2419        |           |                  | 1057.4659      | 529.2366         | E    | 1833.9779        | 917.4926         | 1816.9513        | 908.9793         | 1815.9673      | 908.4873         | 16 |
| 10 | 1222.5449        | 611.7761        |           |                  | 1204.5343      | <b>602.7708</b>  | F    | 1704.9353        | <b>852.9713</b>  | 1687.9087        | 844.4580         | 1686.9247      | 843.9660         | 15 |
| 11 | <b>1350.6398</b> | 675.8235        | 1333.6133 | 667.3103         | 1332.6293      | 666.8183         | K    | 1557.8669        | <b>779.4371</b>  | 1540.8403        | 770.9238         | 1539.8563      | 770.4318         | 14 |
| 12 | 1464.6827        | 732.8450        | 1447.6562 | 724.3317         | 1446.6722      | 723.8397         | N    | <b>1429.7719</b> | 715.3896         | 1412.7454        | 706.8763         | 1411.7613      | 706.3843         | 13 |
| 13 | 1579.7097        | <b>790.3585</b> | 1562.6831 | 781.8452         | 1561.6991      | 781.3532         | D    | 1315.7290        | 658.3681         | <b>1298.7024</b> | 649.8548         | 1297.7184      | 649.3628         | 12 |
| 14 | 1676.7624        | 838.8849        | 1659.7359 | 830.3716         | 1658.7519      | 829.8796         | P    | <b>1200.7020</b> | <b>600.8547</b>  | <b>1183.6755</b> | 592.3414         | 1182.6915      | 591.8494         | 11 |
| 15 | 1804.8210        | 902.9142        | 1787.7945 | 894.4009         | 1786.8105      | 893.9089         | Q    | 1103.6493        | 552.3283         | 1086.6227        | 543.8150         | 1085.6387      | 543.3230         | 10 |
| 16 | 1917.9051        | 959.4562        | 1900.8785 | 950.9429         | 1899.8945      | 950.4509         | L    | <b>975.5907</b>  | 488.2990         | 958.5641         | 479.7857         | 957.5801       | 479.2937         | 9  |
| 17 | 2004.9371        | 1002.9722       | 1987.9106 | 994.4589         | 1986.9266      | 993.9669         | S    | <b>862.5066</b>  | 431.7570         | 845.4801         | 423.2437         | 844.4961       | 422.7517         | 8  |
| 18 | 2118.0212        | 1059.5142       | 2100.9946 | 1051.0010        | 2100.0106      | 1050.5089        | L    | <b>775.4746</b>  | 388.2409         | 758.4481         | 379.7277         | 757.4640       | 379.2357         | 7  |
| 19 | 2231.1052        | 1116.0563       | 2214.0787 | 1107.5430        | 2213.0947      | 1107.0510        | I    | <b>662.3905</b>  | 331.6989         | 645.3640         | 323.1856         | 644.3800       | 322.6936         | 6  |
| 20 | 2318.1373        | 1159.5723       | 2301.1107 | 1151.0590        | 2300.1267      | 1150.5670        | S    | <b>549.3065</b>  | 275.1569         | 532.2799         | 266.6436         | 531.2959       | 266.1516         | 5  |
| 21 | 2389.1744        | 1195.0908       | 2372.1478 | 1186.5776        | 2371.1638      | 1186.0855        | A    | <b>462.2745</b>  | 231.6409         | <b>445.2479</b>  | 223.1276         |                |                  | 4  |
| 22 | 2520.2149        | 1260.6111       | 2503.1883 | 1252.0978        | 2502.2043      | 1251.6058        | M    | <b>391.2373</b>  | 196.1223         | 374.2108         | 187.6090         |                |                  | 3  |
| 23 | 2633.2989        | 1317.1531       | 2616.2724 | 1308.6398        | 2615.2884      | 1308.1478        | I    | <b>260.1969</b>  | 130.6021         | 243.1703         | 122.0888         |                |                  | 2  |
| 24 |                  |                 |           |                  |                |                  | K    | <b>147.1128</b>  | 74.0600          | 130.0863         | 65.5468          |                |                  | 1  |

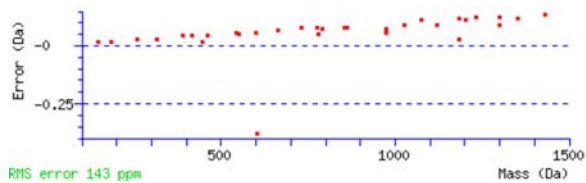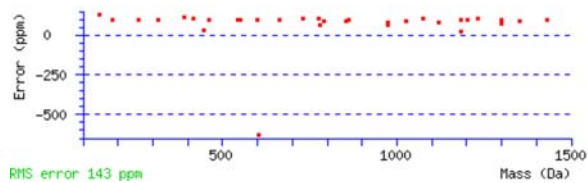

## Peptide View

MS/MS Fragmentation of **AMSTTSVTSSQPGK**

Found in [gi|7304993|ref|NP\\_038838.1](#), drebrin-like [Mus musculus]

Match to Query 378: 1380.720648 from(691.367600,2+)

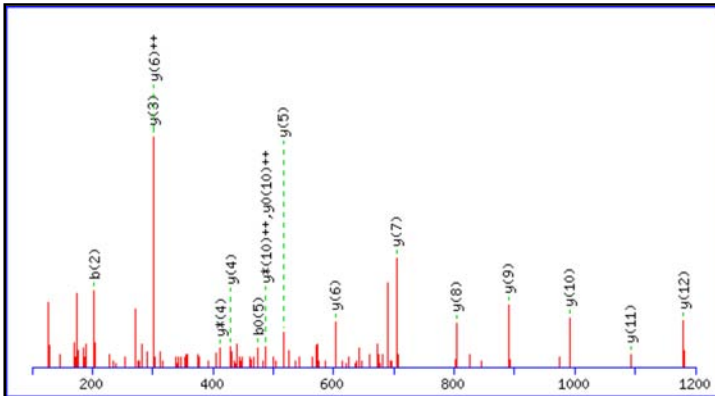

Monoisotopic mass of neutral peptide  $M_r(\text{calc})$ : 1380.6555

Ions Score: 90 Expect: 1.6e-006

Matches (**Bold Red**): 16/124 fragment ions using 18 most intense peaks

| #  | b               | b <sup>++</sup> | b*        | b* <sup>++</sup> | b <sup>0</sup>  | b <sup>0++</sup> | Seq. | y                | y <sup>++</sup> | y*              | y* <sup>++</sup> | y <sup>0</sup> | y <sup>0++</sup> | #  |
|----|-----------------|-----------------|-----------|------------------|-----------------|------------------|------|------------------|-----------------|-----------------|------------------|----------------|------------------|----|
| 1  | 72.0444         | 36.5258         |           |                  |                 |                  | A    |                  |                 |                 |                  |                |                  | 14 |
| 2  | <b>203.0849</b> | 102.0461        |           |                  |                 |                  | M    | 1310.6257        | 655.8165        | 1293.5991       | 647.3032         | 1292.6151      | 646.8112         | 13 |
| 3  | 290.1169        | 145.5621        |           |                  | 272.1063        | 136.5568         | S    | <b>1179.5852</b> | 590.2962        | 1162.5586       | 581.7829         | 1161.5746      | 581.2909         | 12 |
| 4  | 391.1646        | 196.0859        |           |                  | 373.1540        | 187.0806         | T    | <b>1092.5531</b> | 546.7802        | 1075.5266       | 538.2669         | 1074.5426      | 537.7749         | 11 |
| 5  | 492.2123        | 246.6098        |           |                  | <b>474.2017</b> | 237.6045         | T    | <b>991.5055</b>  | 496.2564        | 974.4789        | <b>487.7431</b>  | 973.4949       | <b>487.2511</b>  | 10 |
| 6  | 579.2443        | 290.1258        |           |                  | 561.2337        | 281.1205         | S    | <b>890.4578</b>  | 445.7325        | 873.4312        | 437.2193         | 872.4472       | 436.7272         | 9  |
| 7  | 678.3127        | 339.6600        |           |                  | 660.3021        | 330.6547         | V    | <b>803.4258</b>  | 402.2165        | 786.3992        | 393.7032         | 785.4152       | 393.2112         | 8  |
| 8  | 779.3604        | 390.1838        |           |                  | 761.3498        | 381.1785         | T    | <b>704.3573</b>  | 352.6823        | 687.3308        | 344.1690         | 686.3468       | 343.6770         | 7  |
| 9  | 866.3924        | 433.6998        |           |                  | 848.3818        | 424.6946         | S    | <b>603.3097</b>  | <b>302.1585</b> | 586.2831        | 293.6452         | 585.2991       | 293.1532         | 6  |
| 10 | 953.4244        | 477.2159        |           |                  | 935.4139        | 468.2106         | S    | <b>516.2776</b>  | 258.6425        | 499.2511        | 250.1292         | 498.2671       | 249.6372         | 5  |
| 11 | 1081.4830       | 541.2451        | 1064.4565 | 532.7319         | 1063.4725       | 532.2399         | Q    | <b>429.2456</b>  | 215.1264        | <b>412.2191</b> | 206.6132         |                |                  | 4  |
| 12 | 1178.5358       | 589.7715        | 1161.5092 | 581.2583         | 1160.5252       | 580.7662         | P    | <b>301.1870</b>  | 151.0971        | 284.1605        | 142.5839         |                |                  | 3  |
| 13 | 1235.5572       | 618.2823        | 1218.5307 | 609.7690         | 1217.5467       | 609.2770         | G    | 204.1343         | 102.5708        | 187.1077        | 94.0575          |                |                  | 2  |
| 14 |                 |                 |           |                  |                 |                  | K    | 147.1128         | 74.0600         | 130.0863        | 65.5468          |                |                  | 1  |

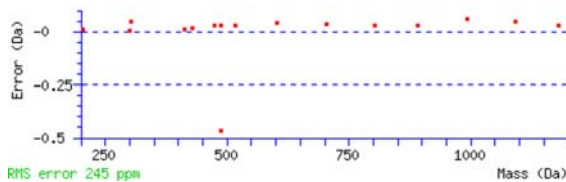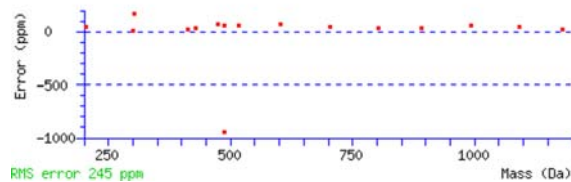

## Peptide View

MS/MS Fragmentation of **ARPLEEALDIVVSTFHK**

Found in [gi|33859624|ref|NP\\_035441.1](#), S100 calcium binding protein A4 [Mus musculus]

Match to Query 485: 1976.159472 from(659.727100,3+)

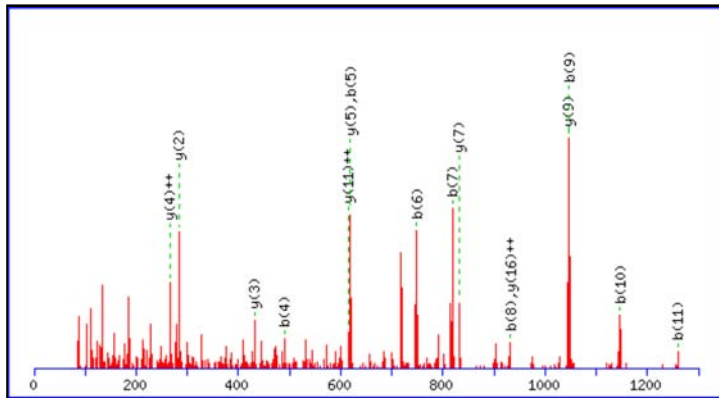

Monoisotopic mass of neutral peptide  $M_r(\text{calc})$ : 1976.0859

Variable modifications:

N-term : N-Acetyl (Protein)

R2 : Arginine-13C615N4 (R-full)

Ions Score: 64 Expect: 0.0016

Matches (**Bold Red**): 16/176 fragment ions using 24 most intense peaks

| #  | b                | b <sup>++</sup> | b*        | b* <sup>++</sup> | b <sup>0</sup> | b <sup>0++</sup> | Seq. | y                | y <sup>++</sup> | y*        | y* <sup>++</sup> | y <sup>0</sup> | y <sup>0++</sup> | #  |
|----|------------------|-----------------|-----------|------------------|----------------|------------------|------|------------------|-----------------|-----------|------------------|----------------|------------------|----|
| 1  | 114.0549         | 57.5311         |           |                  |                |                  | A    |                  |                 |           |                  |                |                  | 17 |
| 2  | 280.1896         | 140.5984        | 263.1631  | 132.0852         |                |                  | R    | 1864.0455        | <b>932.5264</b> | 1847.0189 | 924.0131         | 1846.0349      | 923.5211         | 16 |
| 3  | 377.2424         | 189.1248        | 360.2158  | 180.6115         |                |                  | P    | 1697.9108        | 849.4590        | 1680.8843 | 840.9458         | 1679.9003      | 840.4538         | 15 |
| 4  | <b>490.3264</b>  | 245.6669        | 473.2999  | 237.1536         |                |                  | L    | 1600.8581        | 800.9327        | 1583.8315 | 792.4194         | 1582.8475      | 791.9274         | 14 |
| 5  | <b>619.3690</b>  | 310.1881        | 602.3425  | 301.6749         | 601.3585       | 301.1829         | E    | 1487.7740        | 744.3906        | 1470.7475 | 735.8774         | 1469.7634      | 735.3854         | 13 |
| 6  | <b>748.4116</b>  | 374.7094        | 731.3851  | 366.1962         | 730.4010       | 365.7042         | E    | 1358.7314        | 679.8693        | 1341.7049 | 671.3561         | 1340.7208      | 670.8641         | 12 |
| 7  | <b>819.4487</b>  | 410.2280        | 802.4222  | 401.7147         | 801.4382       | 401.2227         | A    | 1229.6888        | <b>615.3480</b> | 1212.6623 | 606.8348         | 1211.6783      | 606.3428         | 11 |
| 8  | <b>932.5328</b>  | 466.7700        | 915.5062  | 458.2568         | 914.5222       | 457.7647         | L    | 1158.6517        | 579.8295        | 1141.6252 | 571.3162         | 1140.6411      | 570.8242         | 10 |
| 9  | <b>1047.5597</b> | 524.2835        | 1030.5332 | 515.7702         | 1029.5492      | 515.2782         | D    | <b>1045.5677</b> | 523.2875        | 1028.5411 | 514.7742         | 1027.5571      | 514.2822         | 9  |
| 10 | <b>1146.6281</b> | 573.8177        | 1129.6016 | 565.3044         | 1128.6176      | 564.8124         | V    | 930.5407         | 465.7740        | 913.5142  | 457.2607         | 912.5301       | 456.7687         | 8  |
| 11 | <b>1259.7122</b> | 630.3597        | 1242.6856 | 621.8465         | 1241.7016      | 621.3545         | I    | <b>831.4723</b>  | 416.2398        | 814.4458  | 407.7265         | 813.4617       | 407.2345         | 7  |
| 12 | 1358.7806        | 679.8939        | 1341.7541 | 671.3807         | 1340.7700      | 670.8887         | V    | 718.3882         | 359.6978        | 701.3617  | 351.1845         | 700.3777       | 350.6925         | 6  |
| 13 | 1445.8126        | 723.4100        | 1428.7861 | 714.8967         | 1427.8021      | 714.4047         | S    | <b>619.3198</b>  | 310.1636        | 602.2933  | 301.6503         | 601.3093       | 301.1583         | 5  |
| 14 | 1546.8603        | 773.9338        | 1529.8338 | 765.4205         | 1528.8497      | 764.9285         | T    | 532.2878         | <b>266.6475</b> | 515.2613  | 258.1343         | 514.2772       | 257.6423         | 4  |
| 15 | 1693.9287        | 847.4680        | 1676.9022 | 838.9547         | 1675.9182      | 838.4627         | F    | <b>431.2401</b>  | 216.1237        | 414.2136  | 207.6104         |                |                  | 3  |
| 16 | 1830.9876        | 915.9975        | 1813.9611 | 907.4842         | 1812.9771      | 906.9922         | H    | <b>284.1717</b>  | 142.5895        | 267.1452  | 134.0762         |                |                  | 2  |
| 17 |                  |                 |           |                  |                |                  | K    | 147.1128         | 74.0600         | 130.0863  | 65.5468          |                |                  | 1  |

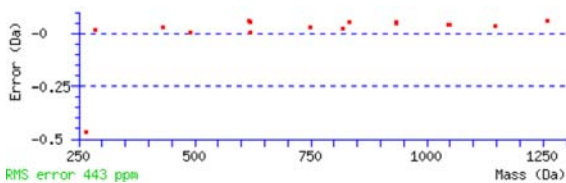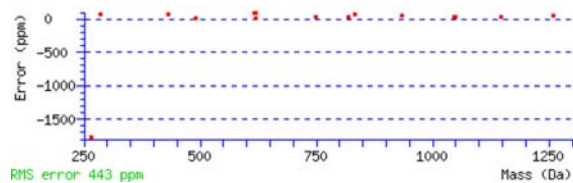

## Peptide View

MS/MS Fragmentation of **AVDLLNYTQWFPIVFFNPDSR**

Found in [gi|7549795|ref|NP\\_035727.1](#), tight junction protein 2 [Mus musculus]

Match to Query 786: 2660.383248 from(1331.198900,2+)

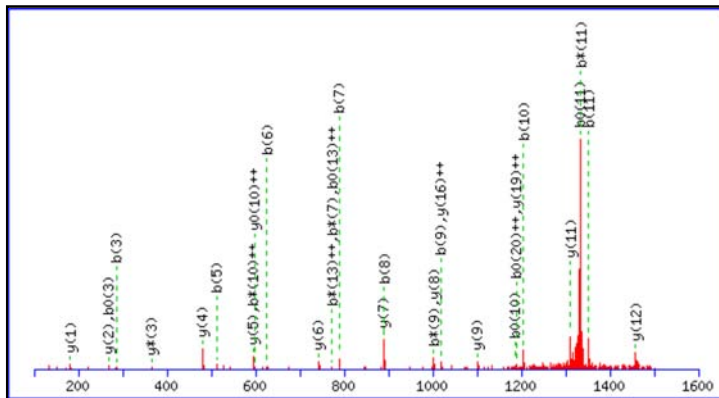

Monoisotopic mass of neutral peptide  $M_r(\text{calc})$ : 2660.3734

Variable modifications:

R22 : Arginine-1306 (R-1306)

Ions Score: 57 Expect: 0.016

Matches (**Bold Red**): 32/236 fragment ions using 66 most intense peaks

| #  | b                | b <sup>++</sup> | b*               | b* <sup>++</sup> | b <sup>0</sup>   | b <sup>0++</sup> | Seq. | y                | y <sup>++</sup>  | y*              | y* <sup>++</sup> | y <sup>0</sup> | y <sup>0++</sup> | #  |
|----|------------------|-----------------|------------------|------------------|------------------|------------------|------|------------------|------------------|-----------------|------------------|----------------|------------------|----|
| 1  | 72.0444          | 36.5258         |                  |                  |                  |                  | A    |                  |                  |                 |                  |                |                  | 22 |
| 2  | 171.1128         | 86.0600         |                  |                  |                  |                  | V    | 2590.3436        | 1295.6754        | 2573.3170       | 1287.1621        | 2572.3330      | 1286.6701        | 21 |
| 3  | <b>286.1397</b>  | 143.5735        |                  |                  | <b>268.1292</b>  | 134.5682         | D    | 2491.2751        | 1246.1412        | 2474.2486       | 1237.6279        | 2473.2646      | 1237.1359        | 20 |
| 4  | 399.2238         | 200.1155        |                  |                  | 381.2132         | 191.1103         | L    | 2376.2482        | <b>1188.6277</b> | 2359.2217       | 1180.1145        | 2358.2376      | 1179.6225        | 19 |
| 5  | <b>512.3079</b>  | 256.6576        |                  |                  | 494.2973         | 247.6523         | L    | 2263.1641        | 1132.0857        | 2246.1376       | 1123.5724        | 2245.1536      | 1123.0804        | 18 |
| 6  | <b>626.3508</b>  | 313.6790        | 609.3242         | 305.1658         | 608.3402         | 304.6737         | N    | 2150.0801        | 1075.5437        | 2133.0535       | 1067.0304        | 2132.0695      | 1066.5384        | 17 |
| 7  | <b>789.4141</b>  | 395.2107        | <b>772.3876</b>  | 386.6974         | 771.4036         | 386.2054         | Y    | 2036.0372        | <b>1018.5222</b> | 2019.0106       | 1010.0089        | 2018.0266      | 1009.5169        | 16 |
| 8  | <b>890.4618</b>  | 445.7345        | 873.4352         | 437.2213         | 872.4512         | 436.7293         | T    | 1872.9738        | 936.9906         | 1855.9473       | 928.4773         | 1854.9633      | 927.9853         | 15 |
| 9  | <b>1018.5204</b> | 509.7638        | <b>1001.4938</b> | 501.2506         | 1000.5098        | 500.7585         | Q    | 1771.9261        | 886.4667         | 1754.8996       | 877.9534         | 1753.9156      | 877.4614         | 14 |
| 10 | <b>1204.5997</b> | 602.8035        | 1187.5731        | <b>594.2902</b>  | <b>1186.5891</b> | 593.7982         | W    | 1643.8676        | 822.4374         | 1626.8410       | 813.9241         | 1625.8570      | 813.4321         | 13 |
| 11 | <b>1351.6681</b> | 676.3377        | <b>1334.6415</b> | 667.8244         | <b>1333.6575</b> | 667.3324         | F    | <b>1457.7883</b> | 729.3978         | 1440.7617       | 720.8845         | 1439.7777      | 720.3925         | 12 |
| 12 | 1448.7209        | 724.8641        | 1431.6943        | 716.3508         | 1430.7103        | 715.8588         | P    | <b>1310.7198</b> | 655.8636         | 1293.6933       | 647.3503         | 1292.7093      | 646.8583         | 11 |
| 13 | 1561.8049        | 781.4061        | 1544.7784        | <b>772.8928</b>  | 1543.7944        | <b>772.4008</b>  | I    | 1213.6671        | 607.3372         | 1196.6405       | 598.8239         | 1195.6565      | <b>598.3319</b>  | 10 |
| 14 | 1660.8733        | 830.9403        | 1643.8468        | 822.4270         | 1642.8628        | 821.9350         | V    | <b>1100.5830</b> | 550.7952         | 1083.5565       | 542.2819         | 1082.5725      | 541.7899         | 9  |
| 15 | 1773.9574        | 887.4823        | 1756.9308        | 878.9691         | 1755.9468        | 878.4770         | I    | <b>1001.5146</b> | 501.2609         | 984.4881        | 492.7477         | 983.5041       | 492.2557         | 8  |
| 16 | 1921.0258        | 961.0165        | 1903.9992        | 952.5033         | 1903.0152        | 952.0113         | F    | <b>888.4306</b>  | 444.7189         | 871.4040        | 436.2056         | 870.4200       | 435.7136         | 7  |
| 17 | 2068.0942        | 1034.5507       | 2051.0677        | 1026.0375        | 2050.0836        | 1025.5455        | F    | <b>741.3621</b>  | 371.1847         | 724.3356        | 362.6714         | 723.3516       | 362.1794         | 6  |
| 18 | 2182.1371        | 1091.5722       | 2165.1106        | 1083.0589        | 2164.1266        | 1082.5669        | N    | <b>594.2937</b>  | 297.6505         | 577.2672        | 289.1372         | 576.2832       | 288.6452         | 5  |
| 19 | 2279.1899        | 1140.0986       | 2262.1633        | 1131.5853        | 2261.1793        | 1131.0933        | P    | <b>480.2508</b>  | 240.6290         | 463.2243        | 232.1158         | 462.2402       | 231.6238         | 4  |
| 20 | 2394.2168        | 1197.6121       | 2377.1903        | 1189.0988        | 2376.2063        | <b>1188.6068</b> | D    | 383.1980         | 192.1027         | <b>366.1715</b> | 183.5894         | 365.1875       | 183.0974         | 3  |
| 21 | 2481.2489        | 1241.1281       | 2464.2223        | 1232.6148        | 2463.2383        | 1232.1228        | S    | <b>268.1711</b>  | 134.5892         | 251.1446        | 126.0759         | 250.1605       | 125.5839         | 2  |
| 22 |                  |                 |                  |                  |                  |                  | R    | <b>181.1391</b>  | 91.0732          | 164.1125        | 82.5599          |                |                  | 1  |

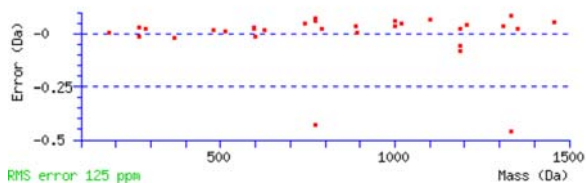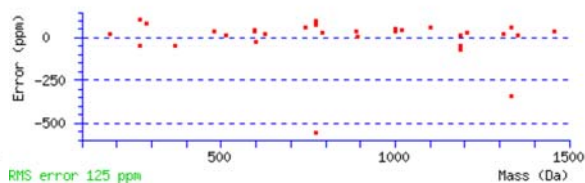

## Peptide View

MS/MS Fragmentation of **EFATLIIDLSEAK**

Found in [gi|51921285|ref|NP\\_001004144.1](#), G protein-coupled receptor kinase-interactor 1 [Mus musculus]

Match to Query 338: 1561.937048 from(781.975800,2+)

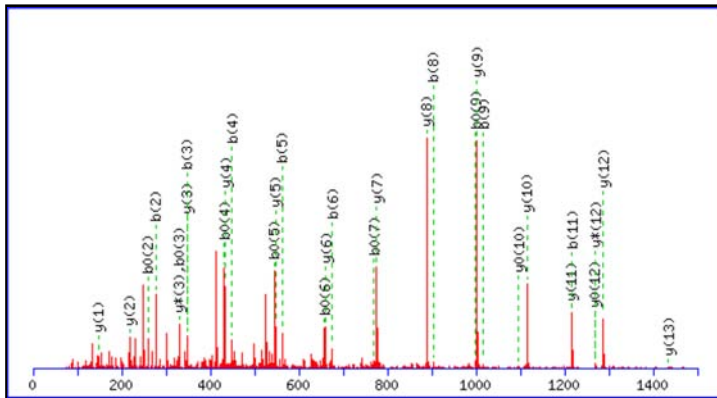

Monoisotopic mass of neutral peptide  $M_r(\text{calc})$ : 1561.8603

Ions Score: 68 Expect: 0.00033

Matches (**Bold Red**): 32/126 fragment ions using 90 most intense peaks

| #  | b                | b <sup>++</sup> | b <sup>0</sup>  | b <sup>0++</sup> | Seq.     | y                | y <sup>++</sup> | y*               | y* <sup>++</sup> | y <sup>0</sup>   | y <sup>0++</sup> | #         |
|----|------------------|-----------------|-----------------|------------------|----------|------------------|-----------------|------------------|------------------|------------------|------------------|-----------|
| 1  | 130.0499         | 65.5286         | 112.0393        | 56.5233          | <b>E</b> |                  |                 |                  |                  |                  |                  | <b>14</b> |
| 2  | <b>277.1183</b>  | 139.0628        | <b>259.1077</b> | 130.0575         | <b>F</b> | <b>1433.8250</b> | 717.4161        | 1416.7984        | 708.9028         | 1415.8144        | 708.4108         | <b>13</b> |
| 3  | <b>348.1554</b>  | 174.5813        | <b>330.1448</b> | 165.5760         | <b>A</b> | <b>1286.7566</b> | 643.8819        | <b>1269.7300</b> | 635.3686         | <b>1268.7460</b> | 634.8766         | <b>12</b> |
| 4  | <b>449.2031</b>  | 225.1052        | <b>431.1925</b> | 216.0999         | <b>T</b> | <b>1215.7195</b> | 608.3634        | 1198.6929        | 599.8501         | 1197.7089        | 599.3581         | <b>11</b> |
| 5  | <b>562.2871</b>  | 281.6472        | <b>544.2766</b> | 272.6419         | <b>L</b> | <b>1114.6718</b> | 557.8395        | 1097.6452        | 549.3262         | <b>1096.6612</b> | 548.8342         | <b>10</b> |
| 6  | <b>675.3712</b>  | 338.1892        | <b>657.3606</b> | 329.1839         | <b>I</b> | <b>1001.5877</b> | 501.2975        | 984.5612         | 492.7842         | 983.5771         | 492.2922         | <b>9</b>  |
| 7  | 788.4552         | 394.7313        | <b>770.4447</b> | 385.7260         | <b>I</b> | <b>888.5037</b>  | 444.7555        | 871.4771         | 436.2422         | 870.4931         | 435.7502         | <b>8</b>  |
| 8  | <b>903.4822</b>  | 452.2447        | 885.4716        | 443.2394         | <b>D</b> | <b>775.4196</b>  | 388.2134        | 758.3930         | 379.7002         | 757.4090         | 379.2082         | <b>7</b>  |
| 9  | <b>1016.5662</b> | 508.7868        | <b>998.5557</b> | 499.7815         | <b>I</b> | <b>660.3927</b>  | 330.7000        | 643.3661         | 322.1867         | 642.3821         | 321.6947         | <b>6</b>  |
| 10 | 1129.6503        | 565.3288        | 1111.6397       | 556.3235         | <b>L</b> | <b>547.3086</b>  | 274.1579        | 530.2820         | 265.6447         | 529.2980         | 265.1527         | <b>5</b>  |
| 11 | <b>1216.6823</b> | 608.8448        | 1198.6718       | 599.8395         | <b>S</b> | <b>434.2245</b>  | 217.6159        | 417.1980         | 209.1026         | 416.2140         | 208.6106         | <b>4</b>  |
| 12 | 1345.7249        | 673.3661        | 1327.7144       | 664.3608         | <b>E</b> | <b>347.1925</b>  | 174.0999        | <b>330.1660</b>  | 165.5866         | 329.1819         | 165.0946         | <b>3</b>  |
| 13 | 1416.7620        | 708.8847        | 1398.7515       | 699.8794         | <b>A</b> | <b>218.1499</b>  | 109.5786        | 201.1234         | 101.0653         |                  |                  | <b>2</b>  |
| 14 |                  |                 |                 |                  | <b>K</b> | <b>147.1128</b>  | 74.0600         | 130.0863         | 65.5468          |                  |                  | <b>1</b>  |

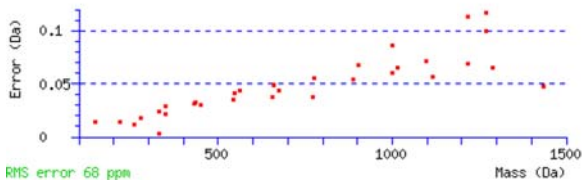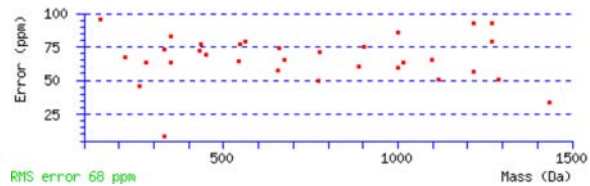



## Peptide View

MS/MS Fragmentation of **ELFALDLVTGVLTIK**

Found in [gi|18087747|ref|NP\\_291059.1](#), protocadherin gamma subfamily C, 3 [Mus musculus]

Match to Query 540: 1630.984648 from(816.499600,2+)

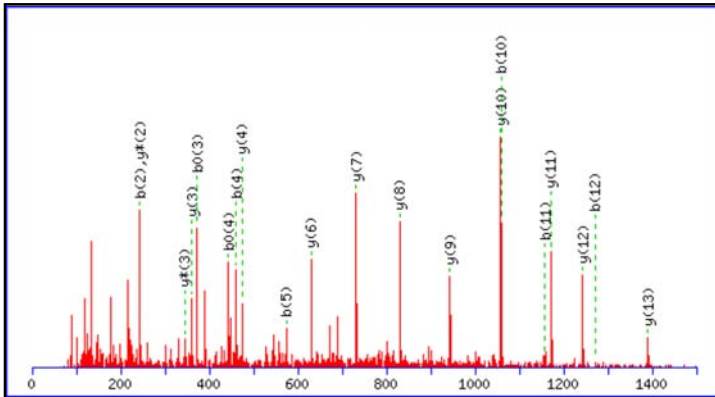

Monoisotopic mass of neutral peptide  $M_r(\text{calc})$ : 1630.9545

Ions Score: 70 Expect: 0.00025

Matches (**Bold Red**): 20/136 fragment ions using 43 most intense peaks

| #  | b                | b <sup>++</sup> | b <sup>0</sup>  | b <sup>0++</sup> | Seq. | y                | y <sup>++</sup> | y*              | y* <sup>++</sup> | y <sup>0</sup> | y <sup>0++</sup> | #  |
|----|------------------|-----------------|-----------------|------------------|------|------------------|-----------------|-----------------|------------------|----------------|------------------|----|
| 1  | 130.0499         | 65.5286         | 112.0393        | 56.5233          | E    |                  |                 |                 |                  |                |                  | 15 |
| 2  | <b>243.1339</b>  | 122.0706        | 225.1234        | 113.0653         | L    | 1502.9192        | 751.9632        | 1485.8927       | 743.4500         | 1484.9086      | 742.9580         | 14 |
| 3  | 390.2023         | 195.6048        | <b>372.1918</b> | 186.5995         | F    | <b>1389.8351</b> | 695.4212        | 1372.8086       | 686.9079         | 1371.8246      | 686.4159         | 13 |
| 4  | <b>461.2394</b>  | 231.1234        | <b>443.2289</b> | 222.1181         | A    | <b>1242.7667</b> | 621.8870        | 1225.7402       | 613.3737         | 1224.7562      | 612.8817         | 12 |
| 5  | <b>574.3235</b>  | 287.6654        | 556.3129        | 278.6601         | L    | <b>1171.7296</b> | 586.3684        | 1154.7031       | 577.8552         | 1153.7191      | 577.3632         | 11 |
| 6  | 689.3504         | 345.1789        | 671.3399        | 336.1736         | D    | <b>1058.6456</b> | 529.8264        | 1041.6190       | 521.3131         | 1040.6350      | 520.8211         | 10 |
| 7  | 802.4345         | 401.7209        | 784.4239        | 392.7156         | L    | <b>943.6186</b>  | 472.3129        | 926.5921        | 463.7997         | 925.6081       | 463.3077         | 9  |
| 8  | 901.5029         | 451.2551        | 883.4924        | 442.2498         | V    | <b>830.5346</b>  | 415.7709        | 813.5080        | 407.2576         | 812.5240       | 406.7656         | 8  |
| 9  | 1002.5506        | 501.7789        | 984.5400        | 492.7737         | T    | <b>731.4662</b>  | 366.2367        | 714.4396        | 357.7234         | 713.4556       | 357.2314         | 7  |
| 10 | <b>1059.5721</b> | 530.2897        | 1041.5615       | 521.2844         | G    | <b>630.4185</b>  | 315.7129        | 613.3919        | 307.1996         | 612.4079       | 306.7076         | 6  |
| 11 | <b>1158.6405</b> | 579.8239        | 1140.6299       | 570.8186         | V    | 573.3970         | 287.2021        | 556.3705        | 278.6889         | 555.3864       | 278.1969         | 5  |
| 12 | <b>1271.7245</b> | 636.3659        | 1253.7140       | 627.3606         | L    | <b>474.3286</b>  | 237.6679        | 457.3021        | 229.1547         | 456.3180       | 228.6627         | 4  |
| 13 | 1372.7722        | 686.8897        | 1354.7616       | 677.8845         | T    | <b>361.2445</b>  | 181.1259        | <b>344.2180</b> | 172.6126         | 343.2340       | 172.1206         | 3  |
| 14 | 1485.8563        | 743.4318        | 1467.8457       | 734.4265         | I    | 260.1969         | 130.6021        | <b>243.1703</b> | 122.0888         |                |                  | 2  |
| 15 |                  |                 |                 |                  | K    | 147.1128         | 74.0600         | 130.0863        | 65.5468          |                |                  | 1  |

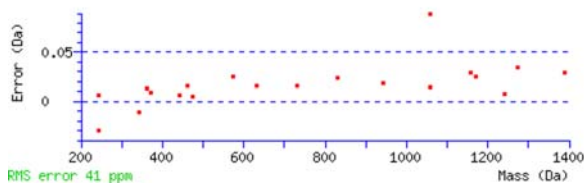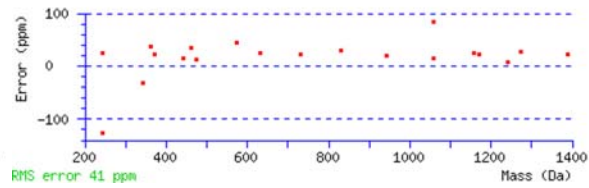

## Peptide View

MS/MS Fragmentation of **EQFALAMYFIQK**

Found in [gi|6679669|ref|NP\\_031970.1](#), epidermal growth factor receptor pathway substrate 15, related [Mus musculus]

Match to Query 924: 1615.898248 from(808.956400,2+)

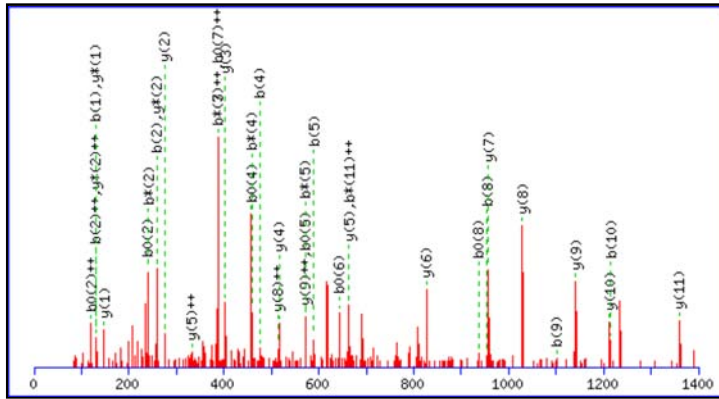

Monoisotopic mass of neutral peptide  $M_r(\text{calc})$ : 1615.8068

Ions Score: 51 Expect: 0.015

Matches (**Bold Red**): 39/118 fragment ions using 87 most intense peaks

| #  | b                | b <sup>++</sup> | b*              | b* <sup>++</sup> | b <sup>0</sup>  | b <sup>0++</sup> | Seq.     | y                | y <sup>++</sup> | y*              | y* <sup>++</sup> | #         |
|----|------------------|-----------------|-----------------|------------------|-----------------|------------------|----------|------------------|-----------------|-----------------|------------------|-----------|
| 1  | <b>130.0499</b>  | 65.5286         |                 |                  | 112.0393        | 56.5233          | <b>E</b> |                  |                 |                 |                  | <b>13</b> |
| 2  | <b>258.1084</b>  | <b>129.5579</b> | <b>241.0819</b> | 121.0446         | <b>240.0979</b> | <b>120.5526</b>  | <b>Q</b> | 1487.7715        | 744.3894        | 1470.7450       | 735.8761         | <b>12</b> |
| 3  | 405.1769         | 203.0921        | <b>388.1503</b> | 194.5788         | <b>387.1663</b> | 194.0868         | <b>F</b> | <b>1359.7129</b> | 680.3601        | 1342.6864       | 671.8468         | <b>11</b> |
| 4  | <b>476.2140</b>  | 238.6106        | <b>459.1874</b> | 230.0973         | <b>458.2034</b> | 229.6053         | <b>A</b> | <b>1212.6445</b> | 606.8259        | 1195.6180       | 598.3126         | <b>10</b> |
| 5  | <b>589.2980</b>  | 295.1527        | <b>572.2715</b> | 286.6394         | <b>571.2875</b> | 286.1474         | <b>L</b> | <b>1141.6074</b> | <b>571.3073</b> | 1124.5809       | 562.7941         | <b>9</b>  |
| 6  | 660.3351         | 330.6712        | 643.3086        | 322.1579         | <b>642.3246</b> | 321.6659         | <b>A</b> | <b>1028.5234</b> | <b>514.7653</b> | 1011.4968       | 506.2520         | <b>8</b>  |
| 7  | 791.3756         | 396.1914        | 774.3491        | <b>387.6782</b>  | 773.3651        | <b>387.1862</b>  | <b>M</b> | <b>957.4862</b>  | 479.2468        | 940.4597        | 470.7335         | <b>7</b>  |
| 8  | <b>954.4389</b>  | 477.7231        | 937.4124        | 469.2098         | <b>936.4284</b> | 468.7178         | <b>Y</b> | <b>826.4458</b>  | 413.7265        | 809.4192        | 405.2132         | <b>6</b>  |
| 9  | <b>1101.5074</b> | 551.2573        | 1084.4808       | 542.7440         | 1083.4968       | 542.2520         | <b>F</b> | <b>663.3824</b>  | <b>332.1949</b> | 646.3559        | 323.6816         | <b>5</b>  |
| 10 | <b>1214.5914</b> | 607.7993        | 1197.5649       | 599.2861         | 1196.5809       | 598.7941         | <b>I</b> | <b>516.3140</b>  | 258.6606        | 499.2875        | 250.1474         | <b>4</b>  |
| 11 | 1342.6500        | 671.8286        | 1325.6234       | <b>663.3154</b>  | 1324.6394       | 662.8234         | <b>Q</b> | <b>403.2300</b>  | 202.1186        | 386.2034        | 193.6053         | <b>3</b>  |
| 12 | 1470.7086        | 735.8579        | 1453.6820       | 727.3447         | 1452.6980       | 726.8526         | <b>Q</b> | <b>275.1714</b>  | 138.0893        | <b>258.1448</b> | <b>129.5761</b>  | <b>2</b>  |
| 13 |                  |                 |                 |                  |                 |                  | <b>K</b> | <b>147.1128</b>  | 74.0600         | <b>130.0863</b> | 65.5468          | <b>1</b>  |

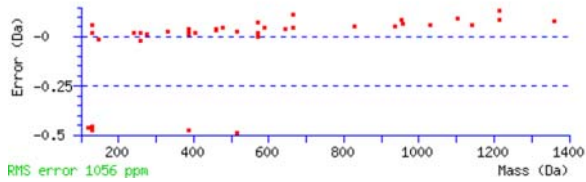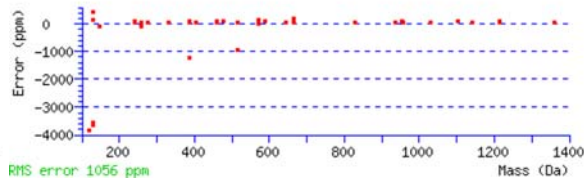



## Peptide View

MS/MS Fragmentation of **FFEVILIDPFHK**

Found in [gi|94385783|ref|XP\\_001004374.1|](#), PREDICTED: similar to ribosomal protein L15 [Mus musculus]

Match to Query 807: 1503.900648 from(752.957600,2+)

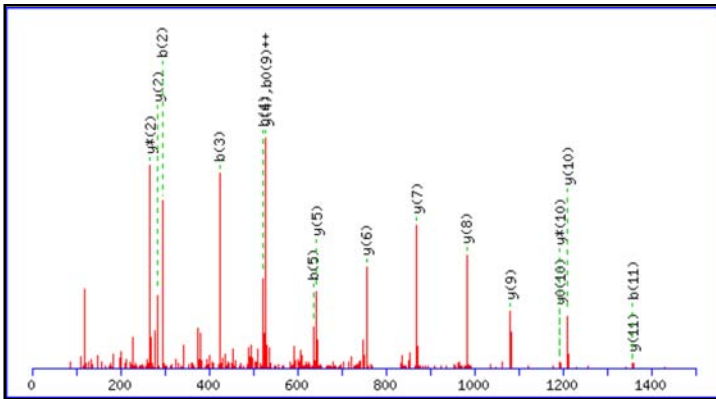

Monoisotopic mass of neutral peptide Mr(calc): 1503.8125

Ions Score: 60 Expect: 0.0018

Matches (**Bold Red**): 18/98 fragment ions using 40 most intense peaks

| #  | b                | b <sup>++</sup> | b <sup>0</sup> | b <sup>0++</sup> | Seq. | y                | y <sup>++</sup> | y*               | y* <sup>++</sup> | y <sup>0</sup>   | y <sup>0++</sup> | #  |
|----|------------------|-----------------|----------------|------------------|------|------------------|-----------------|------------------|------------------|------------------|------------------|----|
| 1  | 148.0757         | 74.5415         |                |                  | F    |                  |                 |                  |                  |                  |                  | 12 |
| 2  | <b>295.1441</b>  | 148.0757        |                |                  | F    | <b>1357.7514</b> | 679.3793        | 1340.7249        | 670.8661         | 1339.7408        | 670.3741         | 11 |
| 3  | <b>424.1867</b>  | 212.5970        | 406.1761       | 203.5917         | E    | <b>1210.6830</b> | 605.8451        | <b>1193.6565</b> | 597.3319         | <b>1192.6724</b> | 596.8399         | 10 |
| 4  | <b>523.2551</b>  | 262.1312        | 505.2445       | 253.1259         | V    | <b>1081.6404</b> | 541.3238        | 1064.6139        | 532.8106         | 1063.6298        | 532.3186         | 9  |
| 5  | <b>636.3392</b>  | 318.6732        | 618.3286       | 309.6679         | I    | <b>982.5720</b>  | 491.7896        | 965.5455         | 483.2764         | 964.5614         | 482.7844         | 8  |
| 6  | 749.4232         | 375.2152        | 731.4127       | 366.2100         | L    | <b>869.4879</b>  | 435.2476        | 852.4614         | 426.7343         | 851.4774         | 426.2423         | 7  |
| 7  | 862.5073         | 431.7573        | 844.4967       | 422.7520         | I    | <b>756.4039</b>  | 378.7056        | 739.3773         | 370.1923         | 738.3933         | 369.7003         | 6  |
| 8  | 977.5342         | 489.2707        | 959.5237       | 480.2655         | D    | <b>643.3198</b>  | 322.1635        | 626.2933         | 313.6503         | 625.3093         | 313.1583         | 5  |
| 9  | 1074.5870        | 537.7971        | 1056.5764      | <b>528.7918</b>  | P    | <b>528.2929</b>  | 264.6501        | 511.2663         | 256.1368         |                  |                  | 4  |
| 10 | 1221.6554        | 611.3313        | 1203.6448      | 602.3260         | F    | 431.2401         | 216.1237        | 414.2136         | 207.6104         |                  |                  | 3  |
| 11 | <b>1358.7143</b> | 679.8608        | 1340.7037      | 670.8555         | H    | <b>284.1717</b>  | 142.5895        | <b>267.1452</b>  | 134.0762         |                  |                  | 2  |
| 12 |                  |                 |                |                  | K    | 147.1128         | 74.0600         | 130.0863         | 65.5468          |                  |                  | 1  |

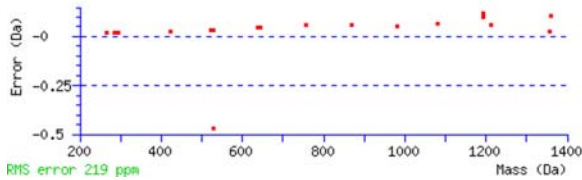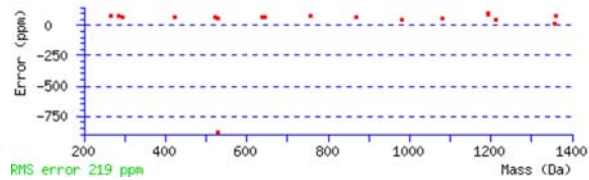

## Peptide View

MS/MS Fragmentation of **FGSAIPIPSLPDK**

Found in [gi|29568084|ref|NP\\_079940.2](#), sorting nexin 9 [Mus musculus]

Match to Query 224: 1340.792648 from(671.403600,2+)

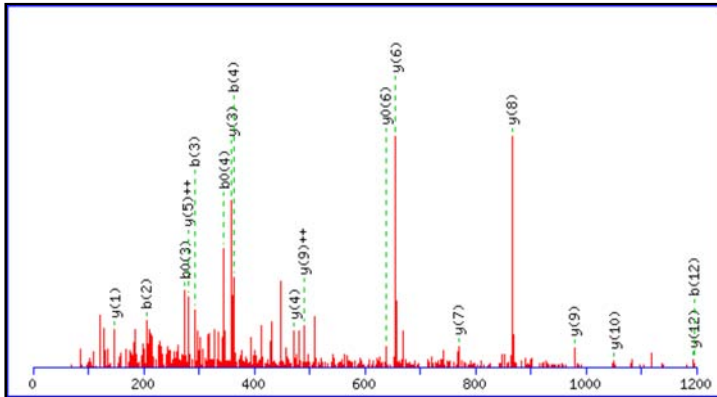

Monoisotopic mass of neutral peptide  $M_r(\text{calc})$ : 1340.7340

Ions Score: 46 Expect: 0.033

Matches (**Bold Red**): 18/114 fragment ions using 42 most intense peaks

| #  | b                | b <sup>++</sup> | b <sup>0</sup>  | b <sup>0++</sup> | Seq. | y                | y <sup>++</sup> | y*        | y <sup>*++</sup> | y <sup>0</sup>  | y <sup>0++</sup> | #  |
|----|------------------|-----------------|-----------------|------------------|------|------------------|-----------------|-----------|------------------|-----------------|------------------|----|
| 1  | 148.0757         | 74.5415         |                 |                  | F    |                  |                 |           |                  |                 |                  | 13 |
| 2  | <b>205.0971</b>  | 103.0522        |                 |                  | G    | <b>1194.6728</b> | 597.8401        | 1177.6463 | 589.3268         | 1176.6623       | 588.8348         | 12 |
| 3  | <b>292.1292</b>  | 146.5682        | <b>274.1186</b> | 137.5629         | S    | 1137.6514        | 569.3293        | 1120.6248 | 560.8160         | 1119.6408       | 560.3240         | 11 |
| 4  | <b>363.1663</b>  | 182.0868        | <b>345.1557</b> | 173.0815         | A    | <b>1050.6193</b> | 525.8133        | 1033.5928 | 517.3000         | 1032.6088       | 516.8080         | 10 |
| 5  | 476.2503         | 238.6288        | 458.2398        | 229.6235         | I    | <b>979.5822</b>  | <b>490.2948</b> | 962.5557  | 481.7815         | 961.5717        | 481.2895         | 9  |
| 6  | 573.3031         | 287.1552        | 555.2925        | 278.1499         | P    | <b>866.4982</b>  | 433.7527        | 849.4716  | 425.2394         | 848.4876        | 424.7474         | 8  |
| 7  | 686.3872         | 343.6972        | 668.3766        | 334.6919         | I    | <b>769.4454</b>  | 385.2263        | 752.4189  | 376.7131         | 751.4348        | 376.2211         | 7  |
| 8  | 783.4399         | 392.2236        | 765.4294        | 383.2183         | P    | <b>656.3614</b>  | 328.6843        | 639.3348  | 320.1710         | <b>638.3508</b> | 319.6790         | 6  |
| 9  | 870.4720         | 435.7396        | 852.4614        | 426.7343         | S    | 559.3086         | <b>280.1579</b> | 542.2820  | 271.6447         | 541.2980        | 271.1527         | 5  |
| 10 | 983.5560         | 492.2816        | 965.5455        | 483.2764         | L    | <b>472.2766</b>  | 236.6419        | 455.2500  | 228.1286         | 454.2660        | 227.6366         | 4  |
| 11 | 1080.6088        | 540.8080        | 1062.5982       | 531.8027         | P    | <b>359.1925</b>  | 180.0999        | 342.1660  | 171.5866         | 341.1819        | 171.0946         | 3  |
| 12 | <b>1195.6357</b> | 598.3215        | 1177.6252       | 589.3162         | D    | 262.1397         | 131.5735        | 245.1132  | 123.0602         | 244.1292        | 122.5682         | 2  |
| 13 |                  |                 |                 |                  | K    | <b>147.1128</b>  | 74.0600         | 130.0863  | 65.5468          |                 |                  | 1  |

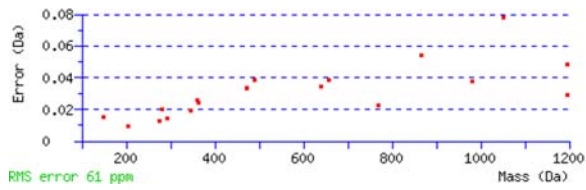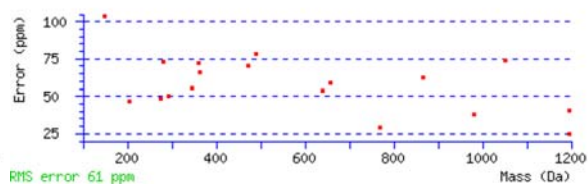

## Peptide View

MS/MS Fragmentation of **FGVEQDVMVFASIR**

Found in [gi|31981562|ref|NP\\_035229.2](#), pyruvate kinase 3 [Mus musculus]

Match to Query 611: 1858.988248 from(930.501400,2+)

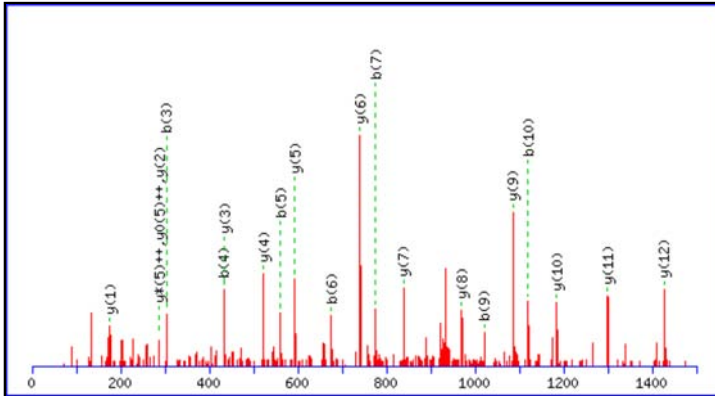

Monoisotopic mass of neutral peptide  $M_r(\text{calc})$ : 1858.8923

Ions Score: 88 Expect:  $5.1 \times 10^{-6}$

Matches (**Bold Red**): 21/160 fragment ions using 37 most intense peaks

| #  | b                | b <sup>++</sup> | b*        | b* <sup>++</sup> | b <sup>0</sup> | b <sup>0++</sup> | Seq. | y                | y <sup>++</sup> | y*        | y* <sup>++</sup> | y <sup>0</sup> | y <sup>0++</sup> | #  |
|----|------------------|-----------------|-----------|------------------|----------------|------------------|------|------------------|-----------------|-----------|------------------|----------------|------------------|----|
| 1  | 148.0757         | 74.5415         |           |                  |                |                  | F    |                  |                 |           |                  |                |                  | 16 |
| 2  | 205.0971         | 103.0522        |           |                  |                |                  | G    | 1712.8312        | 856.9192        | 1695.8046 | 848.4060         | 1694.8206      | 847.9140         | 15 |
| 3  | <b>304.1656</b>  | 152.5864        |           |                  |                |                  | V    | 1655.8097        | 828.4085        | 1638.7832 | 819.8952         | 1637.7992      | 819.4032         | 14 |
| 4  | <b>433.2081</b>  | 217.1077        |           |                  | 415.1976       | 208.1024         | E    | 1556.7413        | 778.8743        | 1539.7148 | 770.3610         | 1538.7308      | 769.8690         | 13 |
| 5  | <b>561.2667</b>  | 281.1370        | 544.2402  | 272.6237         | 543.2562       | 272.1317         | Q    | <b>1427.6987</b> | 714.3530        | 1410.6722 | 705.8397         | 1409.6882      | 705.3477         | 12 |
| 6  | <b>676.2937</b>  | 338.6505        | 659.2671  | 330.1372         | 658.2831       | 329.6452         | D    | <b>1299.6402</b> | 650.3237        | 1282.6136 | 641.8104         | 1281.6296      | 641.3184         | 11 |
| 7  | <b>775.3621</b>  | 388.1847        | 758.3355  | 379.6714         | 757.3515       | 379.1794         | V    | <b>1184.6132</b> | 592.8102        | 1167.5867 | 584.2970         | 1166.6026      | 583.8050         | 10 |
| 8  | 890.3890         | 445.6981        | 873.3625  | 437.1849         | 872.3785       | 436.6929         | D    | <b>1085.5448</b> | 543.2760        | 1068.5183 | 534.7628         | 1067.5342      | 534.2708         | 9  |
| 9  | <b>1021.4295</b> | 511.2184        | 1004.4029 | 502.7051         | 1003.4189      | 502.2131         | M    | <b>970.5179</b>  | 485.7626        | 953.4913  | 477.2493         | 952.5073       | 476.7573         | 8  |
| 10 | <b>1120.4979</b> | 560.7526        | 1103.4714 | 552.2393         | 1102.4873      | 551.7473         | V    | <b>839.4774</b>  | 420.2423        | 822.4508  | 411.7291         | 821.4668       | 411.2370         | 7  |
| 11 | 1267.5663        | 634.2868        | 1250.5398 | 625.7735         | 1249.5558      | 625.2815         | F    | <b>740.4090</b>  | 370.7081        | 723.3824  | 362.1948         | 722.3984       | 361.7028         | 6  |
| 12 | 1338.6034        | 669.8054        | 1321.5769 | 661.2921         | 1320.5929      | 660.8001         | A    | <b>593.3406</b>  | 297.1739        | 576.3140  | <b>288.6606</b>  | 575.3300       | <b>288.1686</b>  | 5  |
| 13 | 1425.6355        | 713.3214        | 1408.6089 | 704.8081         | 1407.6249      | 704.3161         | S    | <b>522.3035</b>  | 261.6554        | 505.2769  | 253.1421         | 504.2929       | 252.6501         | 4  |
| 14 | 1572.7039        | 786.8556        | 1555.6773 | 778.3423         | 1554.6933      | 777.8503         | F    | <b>435.2714</b>  | 218.1393        | 418.2449  | 209.6261         |                |                  | 3  |
| 15 | 1685.7879        | 843.3976        | 1668.7614 | 834.8843         | 1667.7774      | 834.3923         | I    | <b>288.2030</b>  | 144.6051        | 271.1765  | 136.0919         |                |                  | 2  |
| 16 |                  |                 |           |                  |                |                  | R    | <b>175.1190</b>  | 88.0631         | 158.0924  | 79.5498          |                |                  | 1  |

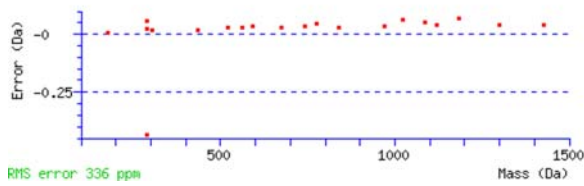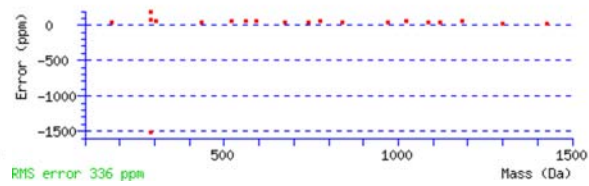

## Peptide View

MS/MS Fragmentation of **FIENLLASDGFHWGLK**

Found in [gi|94385870|ref|XP\\_922372.2](#), PREDICTED: similar to layilin [Mus musculus]

Match to Query 468: 1937.087048 from(969.550800,2+)

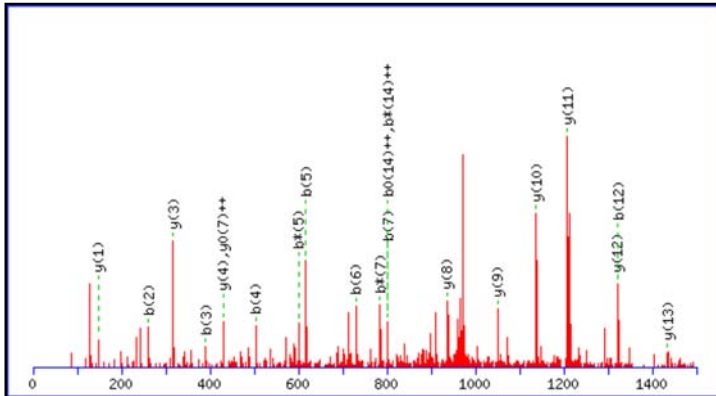

Monoisotopic mass of neutral peptide  $M_r(\text{calc})$ : 1936.9934

Ions Score: 53 Expect: 0.018

Matches (**Bold Red**): 21/170 fragment ions using 52 most intense peaks

| #  | b                | b <sup>++</sup> | b*              | b* <sup>++</sup> | b <sup>0</sup> | b <sup>0++</sup> | Seq. | y                | y <sup>++</sup> | y*        | y* <sup>++</sup> | y <sup>0</sup> | y <sup>0++</sup> | #  |
|----|------------------|-----------------|-----------------|------------------|----------------|------------------|------|------------------|-----------------|-----------|------------------|----------------|------------------|----|
| 1  | 148.0757         | 74.5415         |                 |                  |                |                  | F    |                  |                 |           |                  |                |                  | 17 |
| 2  | <b>261.1597</b>  | 131.0835        |                 |                  |                |                  | I    | 1790.9323        | 895.9698        | 1773.9057 | 887.4565         | 1772.9217      | 886.9645         | 16 |
| 3  | <b>390.2023</b>  | 195.6048        |                 |                  | 372.1918       | 186.5995         | E    | 1677.8482        | 839.4277        | 1660.8217 | 830.9145         | 1659.8377      | 830.4225         | 15 |
| 4  | <b>504.2453</b>  | 252.6263        | 487.2187        | 244.1130         | 486.2347       | 243.6210         | N    | 1548.8056        | 774.9065        | 1531.7791 | 766.3932         | 1530.7951      | 765.9012         | 14 |
| 5  | <b>617.3293</b>  | 309.1683        | <b>600.3028</b> | 300.6550         | 599.3188       | 300.1630         | L    | <b>1434.7627</b> | 717.8850        | 1417.7362 | 709.3717         | 1416.7521      | 708.8797         | 13 |
| 6  | <b>730.4134</b>  | 365.7103        | 713.3868        | 357.1971         | 712.4028       | 356.7050         | L    | <b>1321.6786</b> | 661.3430        | 1304.6521 | 652.8297         | 1303.6681      | 652.3377         | 12 |
| 7  | <b>801.4505</b>  | 401.2289        | <b>784.4239</b> | 392.7156         | 783.4399       | 392.2236         | A    | <b>1208.5946</b> | 604.8009        | 1191.5680 | 596.2877         | 1190.5840      | 595.7956         | 11 |
| 8  | 888.4825         | 444.7449        | 871.4560        | 436.2316         | 870.4720       | 435.7396         | S    | <b>1137.5575</b> | 569.2824        | 1120.5309 | 560.7691         | 1119.5469      | 560.2771         | 10 |
| 9  | 1003.5095        | 502.2584        | 986.4829        | 493.7451         | 985.4989       | 493.2531         | D    | <b>1050.5254</b> | 525.7664        | 1033.4989 | 517.2531         | 1032.5149      | 516.7611         | 9  |
| 10 | 1060.5309        | 530.7691        | 1043.5044       | 522.2558         | 1042.5204      | 521.7638         | G    | <b>935.4985</b>  | 468.2529        | 918.4720  | 459.7396         | 917.4879       | 459.2476         | 8  |
| 11 | 1175.5579        | 588.2826        | 1158.5313       | 579.7693         | 1157.5473      | 579.2773         | D    | 878.4770         | 439.7422        | 861.4505  | 431.2289         | 860.4665       | <b>430.7369</b>  | 7  |
| 12 | <b>1322.6263</b> | 661.8168        | 1305.5997       | 653.3035         | 1304.6157      | 652.8115         | F    | 763.4501         | 382.2287        | 746.4236  | 373.7154         |                |                  | 6  |
| 13 | 1508.7056        | 754.8564        | 1491.6790       | 746.3432         | 1490.6950      | 745.8511         | W    | 616.3817         | 308.6945        | 599.3551  | 300.1812         |                |                  | 5  |
| 14 | 1621.7896        | 811.3985        | 1604.7631       | <b>802.8852</b>  | 1603.7791      | <b>802.3932</b>  | I    | <b>430.3024</b>  | 215.6548        | 413.2758  | 207.1416         |                |                  | 4  |
| 15 | 1678.8111        | 839.9092        | 1661.7846       | 831.3959         | 1660.8005      | 830.9039         | G    | <b>317.2183</b>  | 159.1128        | 300.1918  | 150.5995         |                |                  | 3  |
| 16 | 1791.8952        | 896.4512        | 1774.8686       | 887.9379         | 1773.8846      | 887.4459         | L    | 260.1969         | 130.6021        | 243.1703  | 122.0888         |                |                  | 2  |
| 17 |                  |                 |                 |                  |                |                  | K    | <b>147.1128</b>  | 74.0600         | 130.0863  | 65.5468          |                |                  | 1  |

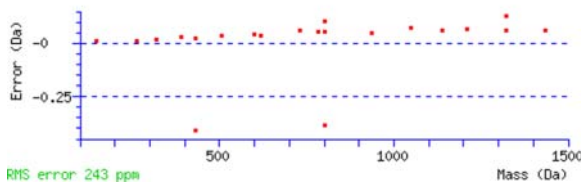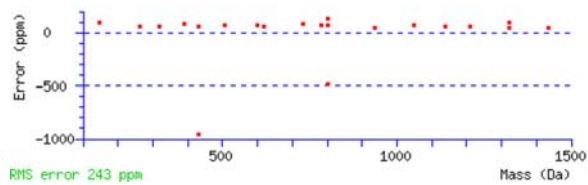

## Peptide View

MS/MS Fragmentation of **FINMFAVLDELK**

Found in [gi|84370256|ref|NP\\_598530.2](#), cytoplasmic FMR1 interacting protein 2 [Mus musculus]

Match to Query 288: 1438.826848 from(720.420700,2+)

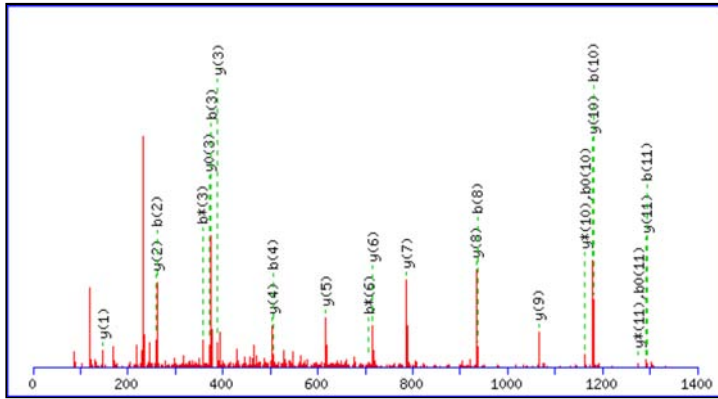

Monoisotopic mass of neutral peptide  $M_r(\text{calc})$ : 1438.7530

Ions Score: 65 Expect: 0.00052

Matches (**Bold Red**): 24/108 fragment ions using 57 most intense peaks

| #  | b                | b <sup>++</sup> | b*              | b* <sup>++</sup> | b <sup>0</sup>   | b <sup>0++</sup> | Seq. | y                | y <sup>++</sup> | y*               | y* <sup>++</sup> | y <sup>0</sup>  | y <sup>0++</sup> | #  |
|----|------------------|-----------------|-----------------|------------------|------------------|------------------|------|------------------|-----------------|------------------|------------------|-----------------|------------------|----|
| 1  | 148.0757         | 74.5415         |                 |                  |                  |                  | F    |                  |                 |                  |                  |                 |                  | 12 |
| 2  | <b>261.1597</b>  | 131.0835        |                 |                  |                  |                  | I    | <b>1292.6919</b> | 646.8496        | <b>1275.6653</b> | 638.3363         | 1274.6813       | 637.8443         | 11 |
| 3  | <b>375.2027</b>  | 188.1050        | <b>358.1761</b> | 179.5917         |                  |                  | N    | <b>1179.6078</b> | 590.3075        | <b>1162.5812</b> | 581.7943         | 1161.5972       | 581.3023         | 10 |
| 4  | <b>506.2432</b>  | 253.6252        | 489.2166        | 245.1119         |                  |                  | M    | <b>1065.5649</b> | 533.2861        | 1048.5383        | 524.7728         | 1047.5543       | 524.2808         | 9  |
| 5  | 653.3116         | 327.1594        | 636.2850        | 318.6461         |                  |                  | F    | <b>934.5244</b>  | 467.7658        | 917.4978         | 459.2526         | 916.5138        | 458.7605         | 8  |
| 6  | 724.3487         | 362.6780        | <b>707.3221</b> | 354.1647         |                  |                  | A    | <b>787.4560</b>  | 394.2316        | 770.4294         | 385.7183         | 769.4454        | 385.2263         | 7  |
| 7  | 823.4171         | 412.2122        | 806.3905        | 403.6989         |                  |                  | V    | <b>716.4189</b>  | 358.7131        | 699.3923         | 350.1998         | 698.4083        | 349.7078         | 6  |
| 8  | <b>936.5011</b>  | 468.7542        | 919.4746        | 460.2409         |                  |                  | L    | <b>617.3505</b>  | 309.1789        | 600.3239         | 300.6656         | 599.3399        | 300.1736         | 5  |
| 9  | 1051.5281        | 526.2677        | 1034.5015       | 517.7544         | 1033.5175        | 517.2624         | D    | <b>504.2664</b>  | 252.6368        | 487.2398         | 244.1236         | 486.2558        | 243.6316         | 4  |
| 10 | <b>1180.5707</b> | 590.7890        | 1163.5441       | 582.2757         | <b>1162.5601</b> | 581.7837         | E    | <b>389.2395</b>  | 195.1234        | 372.2129         | 186.6101         | <b>371.2289</b> | 186.1181         | 3  |
| 11 | <b>1293.6547</b> | 647.3310        | 1276.6282       | 638.8177         | <b>1275.6442</b> | 638.3257         | L    | <b>260.1969</b>  | 130.6021        | 243.1703         | 122.0888         |                 |                  | 2  |
| 12 |                  |                 |                 |                  |                  |                  | K    | <b>147.1128</b>  | 74.0600         | 130.0863         | 65.5468          |                 |                  | 1  |

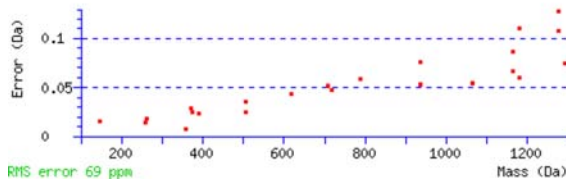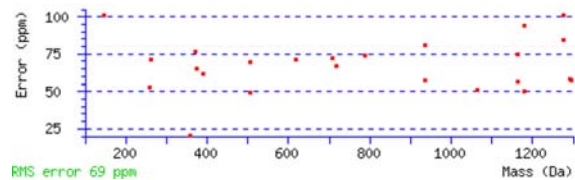

## Peptide View

MS/MS Fragmentation of **FLDGELPLDSFIDVYQSK**

Found in [gi|29244484|ref|NP\\_808544.1](#), vacuolar protein sorting 37B [Mus musculus]

Match to Query 685: 2085.053848 from(1043.534200,2+)

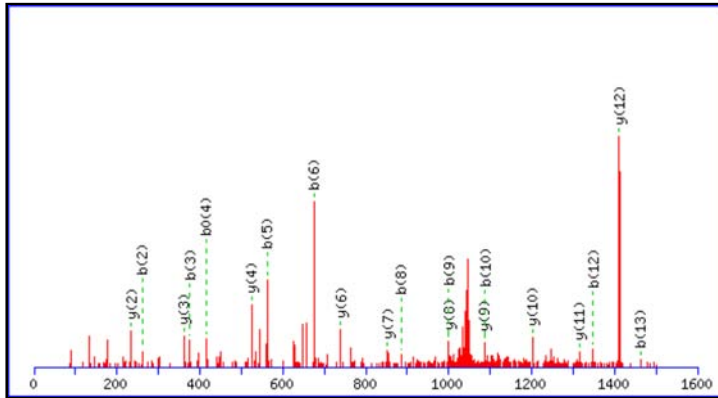

Monoisotopic mass of neutral peptide  $M_r(\text{calc})$ : 2085.0306

Ions Score: 57 Expect: 0.011

Matches (Bold Red): 20/168 fragment ions using 75 most intense peaks

| #  | b                | b <sup>++</sup> | b*        | b* <sup>++</sup> | b <sup>0</sup>  | b <sup>0++</sup> | Seq. | y                | y <sup>++</sup> | y*        | y* <sup>++</sup> | y <sup>0</sup> | y <sup>0++</sup> | #  |
|----|------------------|-----------------|-----------|------------------|-----------------|------------------|------|------------------|-----------------|-----------|------------------|----------------|------------------|----|
| 1  | 148.0757         | 74.5415         |           |                  |                 |                  | F    |                  |                 |           |                  |                |                  | 18 |
| 2  | <b>261.1597</b>  | 131.0835        |           |                  |                 |                  | L    | 1938.9695        | 969.9884        | 1921.9429 | 961.4751         | 1920.9589      | 960.9831         | 17 |
| 3  | <b>376.1867</b>  | 188.5970        |           |                  | 358.1761        | 179.5917         | D    | 1825.8854        | 913.4463        | 1808.8589 | 904.9331         | 1807.8748      | 904.4411         | 16 |
| 4  | 433.2081         | 217.1077        |           |                  | <b>415.1976</b> | 208.1024         | G    | 1710.8585        | 855.9329        | 1693.8319 | 847.4196         | 1692.8479      | 846.9276         | 15 |
| 5  | <b>562.2507</b>  | 281.6290        |           |                  | 544.2402        | 272.6237         | E    | 1653.8370        | 827.4221        | 1636.8105 | 818.9089         | 1635.8264      | 818.4169         | 14 |
| 6  | <b>675.3348</b>  | 338.1710        |           |                  | 657.3242        | 329.1658         | L    | 1524.7944        | 762.9008        | 1507.7679 | 754.3876         | 1506.7838      | 753.8956         | 13 |
| 7  | 772.3876         | 386.6974        |           |                  | 754.3770        | 377.6921         | P    | <b>1411.7104</b> | 706.3588        | 1394.6838 | 697.8455         | 1393.6998      | 697.3535         | 12 |
| 8  | <b>885.4716</b>  | 443.2394        |           |                  | 867.4611        | 434.2342         | L    | <b>1314.6576</b> | 657.8324        | 1297.6310 | 649.3192         | 1296.6470      | 648.8272         | 11 |
| 9  | <b>1000.4986</b> | 500.7529        |           |                  | 982.4880        | 491.7476         | D    | <b>1201.5735</b> | 601.2904        | 1184.5470 | 592.7771         | 1183.5630      | 592.2851         | 10 |
| 10 | <b>1087.5306</b> | 544.2689        |           |                  | 1069.5200       | 535.2636         | S    | <b>1086.5466</b> | 543.7769        | 1069.5200 | 535.2637         | 1068.5360      | 534.7717         | 9  |
| 11 | 1234.5990        | 617.8031        |           |                  | 1216.5884       | 608.7979         | F    | <b>999.5146</b>  | 500.2609        | 982.4880  | 491.7476         | 981.5040       | 491.2556         | 8  |
| 12 | <b>1347.6831</b> | 674.3452        |           |                  | 1329.6725       | 665.3399         | I    | <b>852.4462</b>  | 426.7267        | 835.4196  | 418.2134         | 834.4356       | 417.7214         | 7  |
| 13 | <b>1462.7100</b> | 731.8586        |           |                  | 1444.6994       | 722.8534         | D    | <b>739.3621</b>  | 370.1847        | 722.3355  | 361.6714         | 721.3515       | 361.1794         | 6  |
| 14 | 1561.7784        | 781.3928        |           |                  | 1543.7678       | 772.3876         | V    | 624.3352         | 312.6712        | 607.3086  | 304.1579         | 606.3246       | 303.6659         | 5  |
| 15 | 1724.8417        | 862.9245        |           |                  | 1706.8312       | 853.9192         | Y    | <b>525.2667</b>  | 263.1370        | 508.2402  | 254.6237         | 507.2562       | 254.1317         | 4  |
| 16 | 1852.9003        | 926.9538        | 1835.8738 | 918.4405         | 1834.8898       | 917.9485         | Q    | <b>362.2034</b>  | 181.6053        | 345.1769  | 173.0921         | 344.1928       | 172.6001         | 3  |
| 17 | 1939.9323        | 970.4698        | 1922.9058 | 961.9565         | 1921.9218       | 961.4645         | S    | <b>234.1448</b>  | 117.5761        | 217.1183  | 109.0628         | 216.1343       | 108.5708         | 2  |
| 18 |                  |                 |           |                  |                 |                  | K    | 147.1128         | 74.0600         | 130.0863  | 65.5468          |                |                  | 1  |

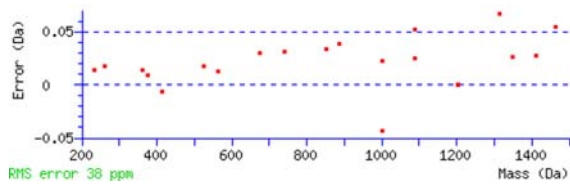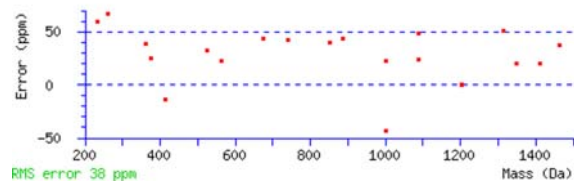



## Peptide View

MS/MS Fragmentation of **FYTNPSYFFDLWK**

Found in [gi|13994209|ref|NP\\_114083.1](#), WASP family 1 [Mus musculus]

Match to Query 650: 1726.949048 from(864.481800,2+)

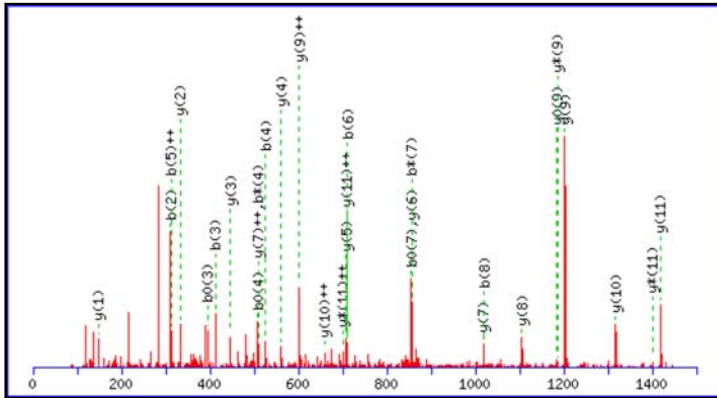

Monoisotopic mass of neutral peptide  $M_r(\text{calc})$ : 1726.8031

Ions Score: 49 Expect: 0.032

Matches (**Bold Red**): 30/128 fragment ions using 77 most intense peaks

| #  | b                | b <sup>++</sup> | b*              | b* <sup>++</sup> | b <sup>0</sup>  | b <sup>0++</sup> | Seq. | y                | y <sup>++</sup> | y*               | y* <sup>++</sup> | y <sup>0</sup>   | y <sup>0++</sup> | #  |
|----|------------------|-----------------|-----------------|------------------|-----------------|------------------|------|------------------|-----------------|------------------|------------------|------------------|------------------|----|
| 1  | 148.0757         | 74.5415         |                 |                  |                 |                  | F    |                  |                 |                  |                  |                  |                  | 13 |
| 2  | <b>311.1390</b>  | 156.0731        |                 |                  |                 |                  | Y    | 1580.7420        | 790.8746        | 1563.7154        | 782.3614         | 1562.7314        | 781.8694         | 12 |
| 3  | <b>412.1867</b>  | 206.5970        |                 |                  | <b>394.1761</b> | 197.5917         | T    | <b>1417.6787</b> | <b>709.3430</b> | <b>1400.6521</b> | <b>700.8297</b>  | 1399.6681        | 700.3377         | 11 |
| 4  | <b>526.2296</b>  | 263.6185        | <b>509.2031</b> | 255.1052         | <b>508.2191</b> | 254.6132         | N    | <b>1316.6310</b> | <b>658.8191</b> | 1299.6044        | 650.3059         | 1298.6204        | 649.8138         | 10 |
| 5  | 623.2824         | <b>312.1448</b> | 606.2558        | 303.6316         | 605.2718        | 303.1395         | P    | <b>1202.5881</b> | <b>601.7977</b> | <b>1185.5615</b> | 593.2844         | <b>1184.5775</b> | 592.7924         | 9  |
| 6  | <b>710.3144</b>  | 355.6608        | 693.2879        | 347.1476         | 692.3039        | 346.6556         | S    | <b>1105.5353</b> | 553.2713        | 1088.5087        | 544.7580         | 1087.5247        | 544.2660         | 8  |
| 7  | 873.3777         | 437.1925        | <b>856.3512</b> | 428.6792         | <b>855.3672</b> | 428.1872         | Y    | <b>1018.5033</b> | <b>509.7553</b> | 1001.4767        | 501.2420         | 1000.4927        | 500.7500         | 7  |
| 8  | <b>1020.4462</b> | 510.7267        | 1003.4196       | 502.2134         | 1002.4356       | 501.7214         | F    | <b>855.4399</b>  | 428.2236        | 838.4134         | 419.7103         | 837.4294         | 419.2183         | 6  |
| 9  | 1167.5146        | 584.2609        | 1150.4880       | 575.7476         | 1149.5040       | 575.2556         | F    | <b>708.3715</b>  | 354.6894        | 691.3450         | 346.1761         | 690.3610         | 345.6841         | 5  |
| 10 | 1282.5415        | 641.7744        | 1265.5150       | 633.2611         | 1264.5309       | 632.7691         | D    | <b>561.3031</b>  | 281.1552        | 544.2766         | 272.6419         | 543.2925         | 272.1499         | 4  |
| 11 | 1395.6256        | 698.3164        | 1378.5990       | 689.8031         | 1377.6150       | 689.3111         | L    | <b>446.2762</b>  | 223.6417        | 429.2496         | 215.1284         |                  |                  | 3  |
| 12 | 1581.7049        | 791.3561        | 1564.6783       | 782.8428         | 1563.6943       | 782.3508         | W    | <b>333.1921</b>  | 167.0997        | 316.1656         | 158.5864         |                  |                  | 2  |
| 13 |                  |                 |                 |                  |                 |                  | K    | <b>147.1128</b>  | 74.0600         | 130.0863         | 65.5468          |                  |                  | 1  |

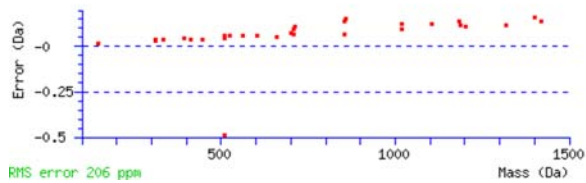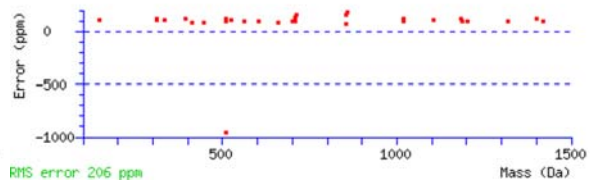

## Peptide View

MS/MS Fragmentation of **GLTVVQAFQELVEPK**

Found in [gil19882207|ref|NP\\_608219.1](#), farnesyl diphosphate synthetase [Mus musculus]

Match to Query 381: 1656.988248 from(829.501400,2+)

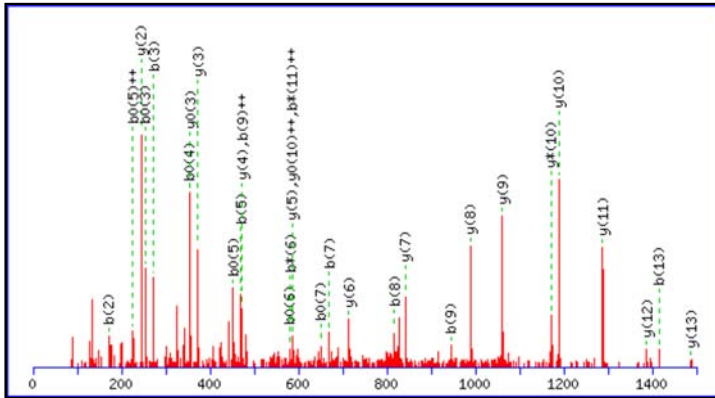

Monoisotopic mass of neutral peptide  $M_r(\text{calc})$ : 1656.9086

Ions Score: 88 Expect: 4e-006

Matches (**Bold Red**): 31/150 fragment ions using 49 most intense peaks

| #  | b                | b <sup>++</sup> | b*              | b* <sup>++</sup> | b <sup>0</sup>  | b <sup>0++</sup> | Seq.     | y                | y <sup>++</sup> | y*               | y* <sup>++</sup> | y <sup>0</sup>  | y <sup>0++</sup> | #         |
|----|------------------|-----------------|-----------------|------------------|-----------------|------------------|----------|------------------|-----------------|------------------|------------------|-----------------|------------------|-----------|
| 1  | 58.0287          | 29.5180         |                 |                  |                 |                  | <b>G</b> |                  |                 |                  |                  |                 |                  | <b>15</b> |
| 2  | <b>171.1128</b>  | 86.0600         |                 |                  |                 |                  | <b>L</b> | 1600.8945        | 800.9509        | 1583.8679        | 792.4376         | 1582.8839       | 791.9456         | <b>14</b> |
| 3  | <b>272.1605</b>  | 136.5839        |                 |                  | <b>254.1499</b> | 127.5786         | <b>T</b> | <b>1487.8104</b> | 744.4088        | 1470.7838        | 735.8956         | 1469.7998       | 735.4036         | <b>13</b> |
| 4  | 371.2289         | 186.1181        |                 |                  | <b>353.2183</b> | 177.1128         | <b>V</b> | <b>1386.7627</b> | 693.8850        | 1369.7362        | 685.3717         | 1368.7521       | 684.8797         | <b>12</b> |
| 5  | <b>470.2973</b>  | 235.6523        |                 |                  | <b>452.2867</b> | <b>226.6470</b>  | <b>V</b> | <b>1287.6943</b> | 644.3508        | 1270.6678        | 635.8375         | 1269.6837       | 635.3455         | <b>11</b> |
| 6  | 598.3559         | 299.6816        | <b>581.3293</b> | 291.1683         | <b>580.3453</b> | 290.6763         | <b>Q</b> | <b>1188.6259</b> | 594.8166        | <b>1171.5993</b> | 586.3033         | 1170.6153       | <b>585.8113</b>  | <b>10</b> |
| 7  | <b>669.3930</b>  | 335.2001        | 652.3664        | 326.6869         | <b>651.3824</b> | 326.1948         | <b>A</b> | <b>1060.5673</b> | 530.7873        | 1043.5408        | 522.2740         | 1042.5567       | 521.7820         | <b>9</b>  |
| 8  | <b>816.4614</b>  | 408.7343        | 799.4348        | 400.2211         | 798.4508        | 399.7291         | <b>F</b> | <b>989.5302</b>  | 495.2687        | 972.5037         | 486.7555         | 971.5196        | 486.2635         | <b>8</b>  |
| 9  | <b>944.5200</b>  | <b>472.7636</b> | 927.4934        | 464.2504         | 926.5094        | 463.7583         | <b>Q</b> | <b>842.4618</b>  | 421.7345        | 825.4352         | 413.2213         | 824.4512        | 412.7293         | <b>7</b>  |
| 10 | 1073.5626        | 537.2849        | 1056.5360       | 528.7716         | 1055.5520       | 528.2796         | <b>E</b> | <b>714.4032</b>  | 357.7052        | 697.3767         | 349.1920         | 696.3926        | 348.7000         | <b>6</b>  |
| 11 | 1186.6466        | 593.8270        | 1169.6201       | <b>585.3137</b>  | 1168.6361       | 584.8217         | <b>L</b> | <b>585.3606</b>  | 293.1839        | 568.3341         | 284.6707         | 567.3501        | 284.1787         | <b>5</b>  |
| 12 | 1285.7150        | 643.3612        | 1268.6885       | 634.8479         | 1267.7045       | 634.3559         | <b>V</b> | <b>472.2766</b>  | 236.6419        | 455.2500         | 228.1286         | 454.2660        | 227.6366         | <b>4</b>  |
| 13 | <b>1414.7576</b> | 707.8825        | 1397.7311       | 699.3692         | 1396.7471       | 698.8772         | <b>E</b> | <b>373.2082</b>  | 187.1077        | 356.1816         | 178.5944         | <b>355.1976</b> | 178.1024         | <b>3</b>  |
| 14 | 1511.8104        | 756.4088        | 1494.7838       | 747.8956         | 1493.7998       | 747.4035         | <b>P</b> | <b>244.1656</b>  | 122.5864        | 227.1390         | 114.0731         |                 |                  | <b>2</b>  |
| 15 |                  |                 |                 |                  |                 |                  | <b>K</b> | 147.1128         | 74.0600         | 130.0863         | 65.5468          |                 |                  | <b>1</b>  |

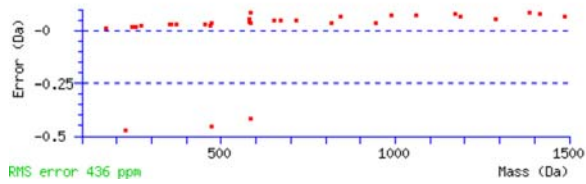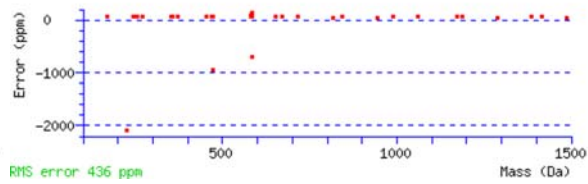

## Peptide View

MS/MS Fragmentation of **GMGGAFVLVLYDEIK**

Found in [gi|22094075|ref|NP\\_031477.1](#), solute carrier family 25, member 5 [Mus musculus]

Match to Query 362: 1610.915648 from(806.465100,2+)

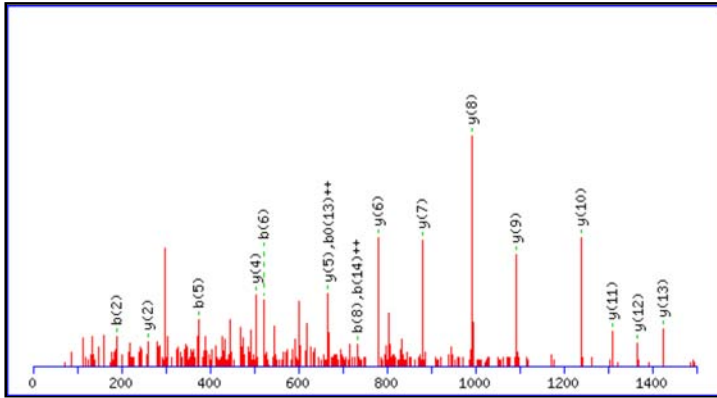

Monoisotopic mass of neutral peptide  $M_r(\text{calc})$ : 1610.8377

Ions Score: 73 Expect: 0.00011

Matches (**Bold Red**): 17/114 fragment ions using 32 most intense peaks

| #  | b               | b <sup>++</sup> | b <sup>0</sup> | b <sup>0++</sup> | Seq.     | y                | y <sup>++</sup> | y*        | y* <sup>++</sup> | y <sup>0</sup> | y <sup>0++</sup> | #         |
|----|-----------------|-----------------|----------------|------------------|----------|------------------|-----------------|-----------|------------------|----------------|------------------|-----------|
| 1  | 58.0287         | 29.5180         |                |                  | <b>G</b> |                  |                 |           |                  |                |                  | <b>15</b> |
| 2  | <b>189.0692</b> | 95.0382         |                |                  | <b>M</b> | 1554.8236        | 777.9154        | 1537.7970 | 769.4022         | 1536.8130      | 768.9101         | <b>14</b> |
| 3  | 246.0907        | 123.5490        |                |                  | <b>G</b> | <b>1423.7831</b> | 712.3952        | 1406.7566 | 703.8819         | 1405.7725      | 703.3899         | <b>13</b> |
| 4  | 303.1121        | 152.0597        |                |                  | <b>G</b> | <b>1366.7616</b> | 683.8845        | 1349.7351 | 675.3712         | 1348.7511      | 674.8792         | <b>12</b> |
| 5  | <b>374.1492</b> | 187.5783        |                |                  | <b>A</b> | <b>1309.7402</b> | 655.3737        | 1292.7136 | 646.8605         | 1291.7296      | 646.3684         | <b>11</b> |
| 6  | <b>521.2177</b> | 261.1125        |                |                  | <b>F</b> | <b>1238.7031</b> | 619.8552        | 1221.6765 | 611.3419         | 1220.6925      | 610.8499         | <b>10</b> |
| 7  | 620.2861        | 310.6467        |                |                  | <b>V</b> | <b>1091.6347</b> | 546.3210        | 1074.6081 | 537.8077         | 1073.6241      | 537.3157         | <b>9</b>  |
| 8  | <b>733.3701</b> | 367.1887        |                |                  | <b>L</b> | <b>992.5663</b>  | 496.7868        | 975.5397  | 488.2735         | 974.5557       | 487.7815         | <b>8</b>  |
| 9  | 832.4385        | 416.7229        |                |                  | <b>V</b> | <b>879.4822</b>  | 440.2447        | 862.4556  | 431.7315         | 861.4716       | 431.2395         | <b>7</b>  |
| 10 | 945.5226        | 473.2649        |                |                  | <b>L</b> | <b>780.4138</b>  | 390.7105        | 763.3872  | 382.1973         | 762.4032       | 381.7052         | <b>6</b>  |
| 11 | 1108.5859       | 554.7966        |                |                  | <b>Y</b> | <b>667.3297</b>  | 334.1685        | 650.3032  | 325.6552         | 649.3192       | 325.1632         | <b>5</b>  |
| 12 | 1223.6129       | 612.3101        | 1205.6023      | 603.3048         | <b>D</b> | <b>504.2664</b>  | 252.6368        | 487.2398  | 244.1236         | 486.2558       | 243.6316         | <b>4</b>  |
| 13 | 1352.6555       | 676.8314        | 1334.6449      | <b>667.8261</b>  | <b>E</b> | 389.2395         | 195.1234        | 372.2129  | 186.6101         | 371.2289       | 186.1181         | <b>3</b>  |
| 14 | 1465.7395       | <b>733.3734</b> | 1447.7290      | 724.3681         | <b>I</b> | <b>260.1969</b>  | 130.6021        | 243.1703  | 122.0888         |                |                  | <b>2</b>  |
| 15 |                 |                 |                |                  | <b>K</b> | 147.1128         | 74.0600         | 130.0863  | 65.5468          |                |                  | <b>1</b>  |

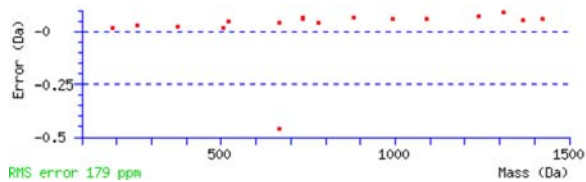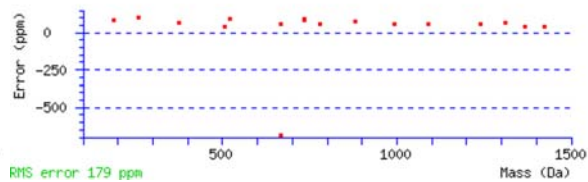

## Peptide View

MS/MS Fragmentation of **GSLDTMLGLLQSDLSR**

Found in [gi|6678313|ref|NP\\_033391.1](#), transforming growth factor beta 1 induced transcript 1 [Mus musculus]

Match to Query 581: 1714.903448 from(858.459000,2+)

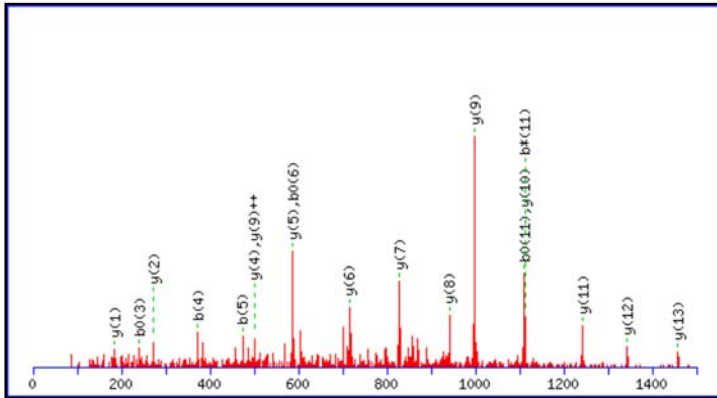

Monoisotopic mass of neutral peptide  $M_r(\text{calc})$ : 1714.9052

Variable modifications:

R16 : Arginine-13C615N4 (R-full)

Ions Score: 135 Expect: 8.7e-011

Matches (**Bold Red**): 19/156 fragment ions using 17 most intense peaks

| #  | b               | b <sup>++</sup> | b*               | b <sup>*++</sup> | b <sup>0</sup>   | b <sup>0++</sup> | Seq. | y                | y <sup>++</sup> | y*        | y <sup>*++</sup> | y <sup>0</sup> | y <sup>0++</sup> | #  |
|----|-----------------|-----------------|------------------|------------------|------------------|------------------|------|------------------|-----------------|-----------|------------------|----------------|------------------|----|
| 1  | 58.0287         | 29.5180         |                  |                  |                  |                  | G    |                  |                 |           |                  |                |                  | 16 |
| 2  | 145.0608        | 73.0340         |                  |                  | 127.0502         | 64.0287          | S    | 1658.8910        | 829.9491        | 1641.8644 | 821.4359         | 1640.8804      | 820.9438         | 15 |
| 3  | 258.1448        | 129.5761        |                  |                  | <b>240.1343</b>  | 120.5708         | L    | 1571.8589        | 786.4331        | 1554.8324 | 777.9198         | 1553.8484      | 777.4278         | 14 |
| 4  | <b>373.1718</b> | 187.0895        |                  |                  | 355.1612         | 178.0842         | D    | <b>1458.7749</b> | 729.8911        | 1441.7483 | 721.3778         | 1440.7643      | 720.8858         | 13 |
| 5  | <b>474.2194</b> | 237.6134        |                  |                  | 456.2089         | 228.6081         | T    | <b>1343.7479</b> | 672.3776        | 1326.7214 | 663.8643         | 1325.7374      | 663.3723         | 12 |
| 6  | 605.2599        | 303.1336        |                  |                  | <b>587.2494</b>  | 294.1283         | M    | <b>1242.7003</b> | 621.8538        | 1225.6737 | 613.3405         | 1224.6897      | 612.8485         | 11 |
| 7  | 718.3440        | 359.6756        |                  |                  | 700.3334         | 350.6703         | L    | <b>1111.6598</b> | 556.3335        | 1094.6332 | 547.8203         | 1093.6492      | 547.3282         | 10 |
| 8  | 775.3654        | 388.1864        |                  |                  | 757.3549         | 379.1811         | G    | <b>998.5757</b>  | <b>499.7915</b> | 981.5492  | 491.2782         | 980.5652       | 490.7862         | 9  |
| 9  | 888.4495        | 444.7284        |                  |                  | 870.4389         | 435.7231         | L    | <b>941.5543</b>  | 471.2808        | 924.5277  | 462.7675         | 923.5437       | 462.2755         | 8  |
| 10 | 1001.5336       | 501.2704        |                  |                  | 983.5230         | 492.2651         | L    | <b>828.4702</b>  | 414.7387        | 811.4437  | 406.2255         | 810.4596       | 405.7335         | 7  |
| 11 | 1129.5921       | 565.2997        | <b>1112.5656</b> | 556.7864         | <b>1111.5816</b> | 556.2944         | Q    | <b>715.3861</b>  | 358.1967        | 698.3596  | 349.6834         | 697.3756       | 349.1914         | 6  |
| 12 | 1216.6242       | 608.8157        | 1199.5976        | 600.3025         | 1198.6136        | 599.8104         | S    | <b>587.3276</b>  | 294.1674        | 570.3010  | 285.6541         | 569.3170       | 285.1621         | 5  |
| 13 | 1331.6511       | 666.3292        | 1314.6246        | 657.8159         | 1313.6406        | 657.3239         | D    | <b>500.2955</b>  | 250.6514        | 483.2690  | 242.1381         | 482.2850       | 241.6461         | 4  |
| 14 | 1444.7352       | 722.8712        | 1427.7086        | 714.3580         | 1426.7246        | 713.8659         | L    | 385.2686         | 193.1379        | 368.2420  | 184.6247         | 367.2580       | 184.1327         | 3  |
| 15 | 1531.7672       | 766.3872        | 1514.7407        | 757.8740         | 1513.7566        | 757.3820         | S    | <b>272.1845</b>  | 136.5959        | 255.1580  | 128.0826         | 254.1740       | 127.5906         | 2  |
| 16 |                 |                 |                  |                  |                  |                  | R    | <b>185.1525</b>  | 93.0799         | 168.1260  | 84.5666          |                |                  | 1  |

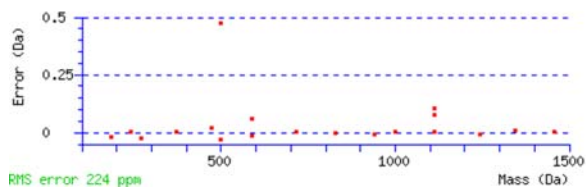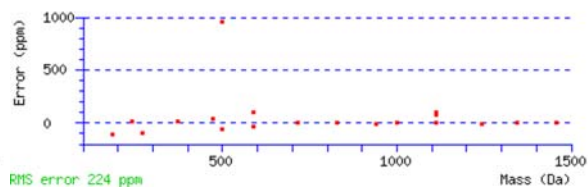

## Peptide View

MS/MS Fragmentation of **GVFVSAFFSLLQLTSVK**

Found in [gi|31982724|ref|NP\\_058056.2](#), MYB binding protein (P160) 1a [Mus musculus]

Match to Query 1035: 1842.164848 from(922.089700,2+)

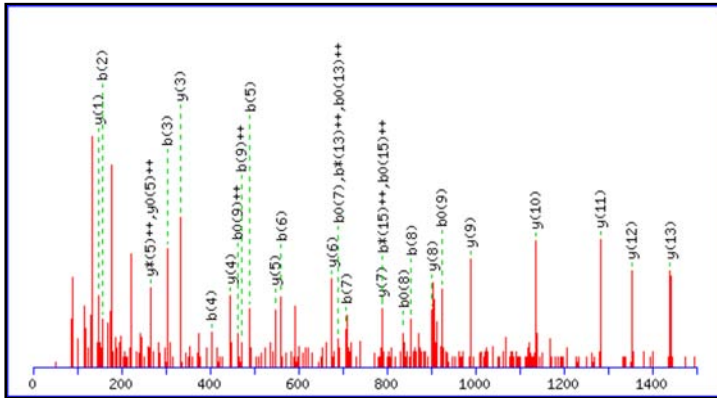

Monoisotopic mass of neutral peptide  $M_r(\text{calc})$ : 1842.0290

Ions Score: 51 Expect: 0.034

Matches (**Bold Red**): 30/158 fragment ions using 79 most intense peaks

| #  | b               | b <sup>++</sup> | b*        | b* <sup>++</sup> | b <sup>0</sup>  | b <sup>0++</sup> | Seq. | y                | y <sup>++</sup> | y*        | y* <sup>++</sup> | y <sup>0</sup> | y <sup>0++</sup> | #  |
|----|-----------------|-----------------|-----------|------------------|-----------------|------------------|------|------------------|-----------------|-----------|------------------|----------------|------------------|----|
| 1  | 58.0287         | 29.5180         |           |                  |                 |                  | G    |                  |                 |           |                  |                |                  | 17 |
| 2  | <b>157.0971</b> | 79.0522         |           |                  |                 |                  | V    | 1786.0149        | 893.5111        | 1768.9884 | 884.9978         | 1768.0043      | 884.5058         | 16 |
| 3  | <b>304.1656</b> | 152.5864        |           |                  |                 |                  | F    | 1686.9465        | 843.9769        | 1669.9199 | 835.4636         | 1668.9359      | 834.9716         | 15 |
| 4  | <b>403.2340</b> | 202.1206        |           |                  |                 |                  | V    | 1539.8781        | 770.4427        | 1522.8515 | 761.9294         | 1521.8675      | 761.4374         | 14 |
| 5  | <b>490.2660</b> | 245.6366        |           |                  | 472.2554        | 236.6314         | S    | <b>1440.8097</b> | 720.9085        | 1423.7831 | 712.3952         | 1422.7991      | 711.9032         | 13 |
| 6  | <b>561.3031</b> | 281.1552        |           |                  | 543.2925        | 272.1499         | A    | <b>1353.7776</b> | 677.3925        | 1336.7511 | 668.8792         | 1335.7671      | 668.3872         | 12 |
| 7  | <b>708.3715</b> | 354.6894        |           |                  | <b>690.3610</b> | 345.6841         | F    | <b>1282.7405</b> | 641.8739        | 1265.7140 | 633.3606         | 1264.7300      | 632.8686         | 11 |
| 8  | <b>855.4399</b> | 428.2236        |           |                  | <b>837.4294</b> | 419.2183         | F    | <b>1135.6721</b> | 568.3397        | 1118.6456 | 559.8264         | 1117.6616      | 559.3344         | 10 |
| 9  | 942.4720        | <b>471.7396</b> |           |                  | <b>924.4614</b> | <b>462.7343</b>  | S    | <b>988.6037</b>  | 494.8055        | 971.5772  | 486.2922         | 970.5931       | 485.8002         | 9  |
| 10 | 1055.5560       | 528.2816        |           |                  | 1037.5455       | 519.2764         | L    | <b>901.5717</b>  | 451.2895        | 884.5451  | 442.7762         | 883.5611       | 442.2842         | 8  |
| 11 | 1168.6401       | 584.8237        |           |                  | 1150.6295       | 575.8184         | L    | <b>788.4876</b>  | 394.7474        | 771.4611  | 386.2342         | 770.4771       | 385.7422         | 7  |
| 12 | 1296.6987       | 648.8530        | 1279.6721 | 640.3397         | 1278.6881       | 639.8477         | Q    | <b>675.4036</b>  | 338.2054        | 658.3770  | 329.6921         | 657.3930       | 329.2001         | 6  |
| 13 | 1397.7463       | 699.3768        | 1380.7198 | <b>690.8635</b>  | 1379.7358       | <b>690.3715</b>  | T    | <b>547.3450</b>  | 274.1761        | 530.3184  | <b>265.6629</b>  | 529.3344       | <b>265.1708</b>  | 5  |
| 14 | 1510.8304       | 755.9188        | 1493.8038 | 747.4056         | 1492.8198       | 746.9136         | L    | <b>446.2973</b>  | 223.6523        | 429.2708  | 215.1390         | 428.2867       | 214.6470         | 4  |
| 15 | 1597.8624       | 799.4349        | 1580.8359 | <b>790.9216</b>  | 1579.8519       | <b>790.4296</b>  | S    | <b>333.2132</b>  | 167.1103        | 316.1867  | 158.5970         | 315.2027       | 158.1050         | 3  |
| 16 | 1696.9308       | 848.9691        | 1679.9043 | 840.4558         | 1678.9203       | 839.9638         | V    | 246.1812         | 123.5942        | 229.1547  | 115.0810         |                |                  | 2  |
| 17 |                 |                 |           |                  |                 |                  | K    | <b>147.1128</b>  | 74.0600         | 130.0863  | 65.5468          |                |                  | 1  |

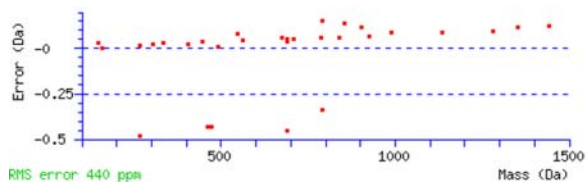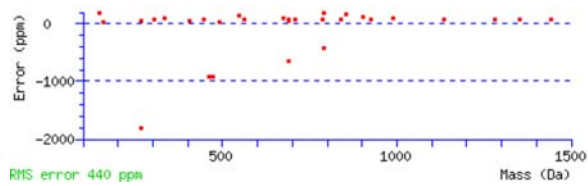

## Peptide View

MS/MS Fragmentation of **HALIYDDLK**

Found in [gi|6680748|ref|NP\\_031531.1](#), ATP synthase, H<sup>+</sup> transporting, mitochondrial F1 complex, alpha subunit, isoform 1 [Mus musculus]

Match to Query 316: 1286.680248 from(644,347400,2+)

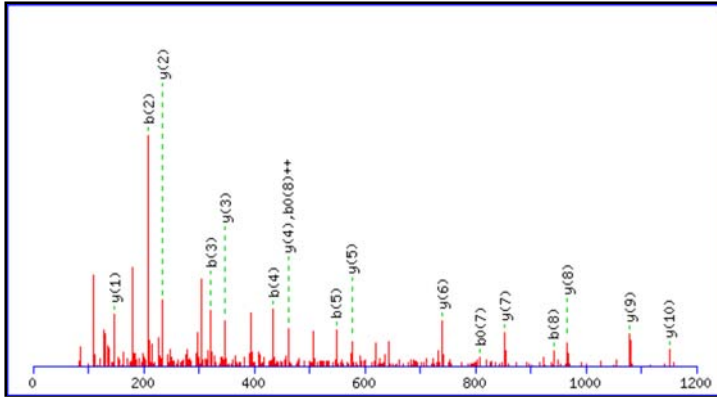

Monoisotopic mass of neutral peptide Mr(calc): 1286.6870

Ions Score: 70 Expect: 0.00013

Matches (**Bold Red**): 17/86 fragment ions using 33 most intense peaks

| #  | b               | b <sup>++</sup> | b <sup>0</sup>  | b <sup>0++</sup> | Seq. | y                | y <sup>++</sup> | y*        | y* <sup>++</sup> | y <sup>0</sup> | y <sup>0++</sup> | #  |
|----|-----------------|-----------------|-----------------|------------------|------|------------------|-----------------|-----------|------------------|----------------|------------------|----|
| 1  | 138.0662        | 69.5367         |                 |                  | H    |                  |                 |           |                  |                |                  | 11 |
| 2  | <b>209.1033</b> | 105.0553        |                 |                  | A    | <b>1150.6354</b> | 575.8213        | 1133.6088 | 567.3081         | 1132.6248      | 566.8161         | 10 |
| 3  | <b>322.1874</b> | 161.5973        |                 |                  | L    | <b>1079.5983</b> | 540.3028        | 1062.5717 | 531.7895         | 1061.5877      | 531.2975         | 9  |
| 4  | <b>435.2714</b> | 218.1393        |                 |                  | I    | <b>966.5142</b>  | 483.7607        | 949.4877  | 475.2475         | 948.5037       | 474.7555         | 8  |
| 5  | <b>548.3555</b> | 274.6814        |                 |                  | I    | <b>853.4302</b>  | 427.2187        | 836.4036  | 418.7054         | 835.4196       | 418.2134         | 7  |
| 6  | 711.4188        | 356.2130        |                 |                  | Y    | <b>740.3461</b>  | 370.6767        | 723.3196  | 362.1634         | 722.3355       | 361.6714         | 6  |
| 7  | 826.4457        | 413.7265        | <b>808.4352</b> | 404.7212         | D    | <b>577.2828</b>  | 289.1450        | 560.2562  | 280.6317         | 559.2722       | 280.1397         | 5  |
| 8  | <b>941.4727</b> | 471.2400        | 923.4621        | <b>462.2347</b>  | D    | <b>462.2558</b>  | 231.6316        | 445.2293  | 223.1183         | 444.2453       | 222.6263         | 4  |
| 9  | 1054.5567       | 527.7820        | 1036.5462       | 518.7767         | L    | <b>347.2289</b>  | 174.1181        | 330.2023  | 165.6048         | 329.2183       | 165.1128         | 3  |
| 10 | 1141.5888       | 571.2980        | 1123.5782       | 562.2927         | S    | <b>234.1448</b>  | 117.5761        | 217.1183  | 109.0628         | 216.1343       | 108.5708         | 2  |
| 11 |                 |                 |                 |                  | K    | <b>147.1128</b>  | 74.0600         | 130.0863  | 65.5468          |                |                  | 1  |

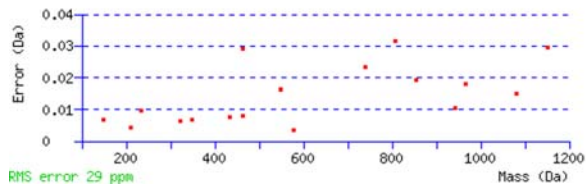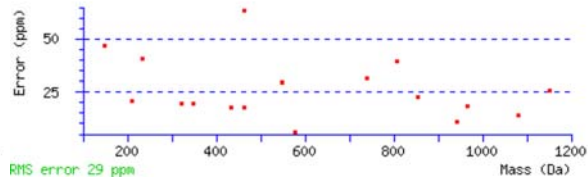



## Peptide View

MS/MS Fragmentation of **HLIPAANTGESK**

Found in [gi|31981925|ref|NP\\_033562.2](#), tyrosine 3-monoxygenase/tryptophan 5-monoxygenase activation protein, epsilon polypeptide [Mus mu

Match to Query 264: 1236.699248 from(619.356900,2+)

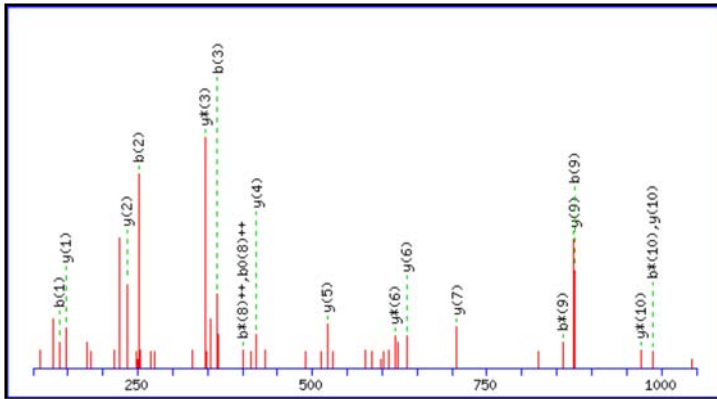

Monoisotopic mass of neutral peptide  $M_r(\text{calc})$ : 1236.6462

Ions Score: 62 Expect: 0.00089

Matches (**Bold Red**): 19/104 fragment ions using 27 most intense peaks

| #  | b               | b <sup>++</sup> | b*              | b* <sup>++</sup> | b <sup>0</sup> | b <sup>0++</sup> | Seq. | y               | y <sup>++</sup> | y*              | y* <sup>++</sup> | y <sup>0</sup> | y <sup>0++</sup> | #  |
|----|-----------------|-----------------|-----------------|------------------|----------------|------------------|------|-----------------|-----------------|-----------------|------------------|----------------|------------------|----|
| 1  | <b>138.0662</b> | 69.5367         |                 |                  |                |                  | H    |                 |                 |                 |                  |                |                  | 12 |
| 2  | <b>251.1502</b> | 126.0788        |                 |                  |                |                  | L    | 1100.5946       | 550.8009        | 1083.5680       | 542.2877         | 1082.5840      | 541.7957         | 11 |
| 3  | <b>364.2343</b> | 182.6208        |                 |                  |                |                  | I    | <b>987.5105</b> | 494.2589        | <b>970.4840</b> | 485.7456         | 969.5000       | 485.2536         | 10 |
| 4  | 461.2871        | 231.1472        |                 |                  |                |                  | P    | <b>874.4265</b> | 437.7169        | 857.3999        | 429.2036         | 856.4159       | 428.7116         | 9  |
| 5  | 532.3242        | 266.6657        |                 |                  |                |                  | A    | 777.3737        | 389.1905        | 760.3472        | 380.6772         | 759.3631       | 380.1852         | 8  |
| 6  | 603.3613        | 302.1843        |                 |                  |                |                  | A    | <b>706.3366</b> | 353.6719        | 689.3101        | 345.1587         | 688.3260       | 344.6667         | 7  |
| 7  | 717.4042        | 359.2057        | 700.3777        | 350.6925         |                |                  | N    | <b>635.2995</b> | 318.1534        | <b>618.2729</b> | 309.6401         | 617.2889       | 309.1481         | 6  |
| 8  | 818.4519        | 409.7296        | 801.4253        | <b>401.2163</b>  | 800.4413       | <b>400.7243</b>  | T    | <b>521.2566</b> | 261.1319        | 504.2300        | 252.6186         | 503.2460       | 252.1266         | 5  |
| 9  | <b>875.4734</b> | 438.2403        | <b>858.4468</b> | 429.7270         | 857.4628       | 429.2350         | G    | <b>420.2089</b> | 210.6081        | 403.1823        | 202.0948         | 402.1983       | 201.6028         | 4  |
| 10 | 1004.5159       | 502.7616        | <b>987.4894</b> | 494.2483         | 986.5054       | 493.7563         | E    | 363.1874        | 182.0973        | <b>346.1609</b> | 173.5841         | 345.1769       | 173.0921         | 3  |
| 11 | 1091.5480       | 546.2776        | 1074.5214       | 537.7644         | 1073.5374      | 537.2723         | S    | <b>234.1448</b> | 117.5761        | 217.1183        | 109.0628         | 216.1343       | 108.5708         | 2  |
| 12 |                 |                 |                 |                  |                |                  | K    | <b>147.1128</b> | 74.0600         | 130.0863        | 65.5468          |                |                  | 1  |

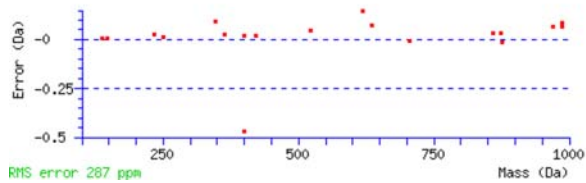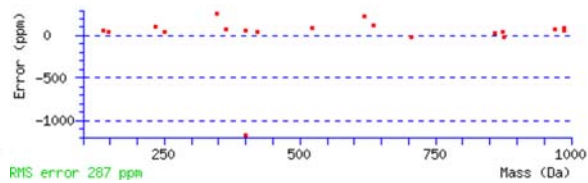

## Peptide View

MS/MS Fragmentation of **HPTQLANSGLK**

Found in [gi|6753856|ref|NP\\_034336.1](#), fibroblast growth factor receptor 1 [Mus musculus]

Match to Query 220: 1164.638848 from(583.326700,2+)

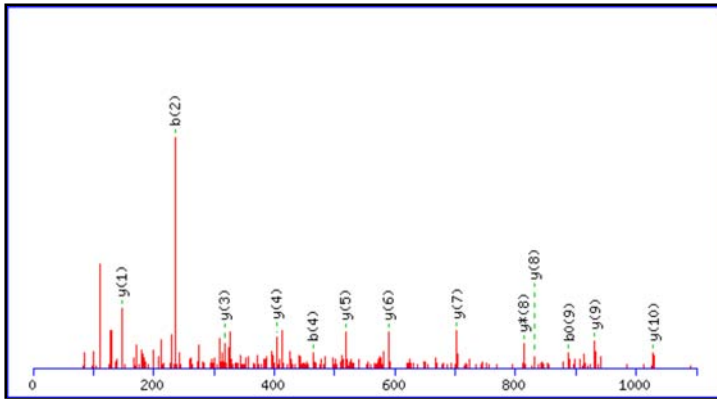

Monoisotopic mass of neutral peptide  $M_r(\text{calc})$ : 1164.6251

Ions Score: 48 Expect: 0.021

Matches (**Bold Red**): 13/104 fragment ions using 32 most intense peaks

| #  | b               | b <sup>++</sup> | b*        | b* <sup>++</sup> | b <sup>0</sup>  | b <sup>0++</sup> | Seq. | y                | y <sup>++</sup> | y*              | y* <sup>++</sup> | y <sup>0</sup> | y <sup>0++</sup> | #  |
|----|-----------------|-----------------|-----------|------------------|-----------------|------------------|------|------------------|-----------------|-----------------|------------------|----------------|------------------|----|
| 1  | 138.0662        | 69.5367         |           |                  |                 |                  | H    |                  |                 |                 |                  |                |                  | 11 |
| 2  | <b>235.1189</b> | 118.0631        |           |                  |                 |                  | P    | <b>1028.5735</b> | 514.7904        | 1011.5469       | 506.2771         | 1010.5629      | 505.7851         | 10 |
| 3  | 336.1666        | 168.5870        |           |                  | 318.1561        | 159.5817         | T    | <b>931.5207</b>  | 466.2640        | 914.4942        | 457.7507         | 913.5101       | 457.2587         | 9  |
| 4  | <b>464.2252</b> | 232.6162        | 447.1987  | 224.1030         | 446.2146        | 223.6110         | Q    | <b>830.4730</b>  | 415.7402        | <b>813.4465</b> | 407.2269         | 812.4625       | 406.7349         | 8  |
| 5  | 577.3093        | 289.1583        | 560.2827  | 280.6450         | 559.2987        | 280.1530         | L    | <b>702.4145</b>  | 351.7109        | 685.3879        | 343.1976         | 684.4039       | 342.7056         | 7  |
| 6  | 648.3464        | 324.6768        | 631.3198  | 316.1636         | 630.3358        | 315.6715         | A    | <b>589.3304</b>  | 295.1688        | 572.3038        | 286.6556         | 571.3198       | 286.1636         | 6  |
| 7  | 762.3893        | 381.6983        | 745.3628  | 373.1850         | 744.3787        | 372.6930         | N    | <b>518.2933</b>  | 259.6503        | 501.2667        | 251.1370         | 500.2827       | 250.6450         | 5  |
| 8  | 849.4213        | 425.2143        | 832.3948  | 416.7010         | 831.4108        | 416.2090         | S    | <b>404.2504</b>  | 202.6288        | 387.2238        | 194.1155         | 386.2398       | 193.6235         | 4  |
| 9  | 906.4428        | 453.7250        | 889.4162  | 445.2118         | <b>888.4322</b> | 444.7198         | G    | <b>317.2183</b>  | 159.1128        | 300.1918        | 150.5995         |                |                  | 3  |
| 10 | 1019.5269       | 510.2671        | 1002.5003 | 501.7538         | 1001.5163       | 501.2618         | L    | 260.1969         | 130.6021        | 243.1703        | 122.0888         |                |                  | 2  |
| 11 |                 |                 |           |                  |                 |                  | K    | <b>147.1128</b>  | 74.0600         | 130.0863        | 65.5468          |                |                  | 1  |

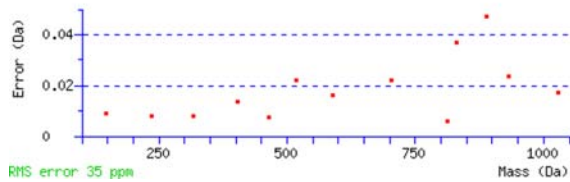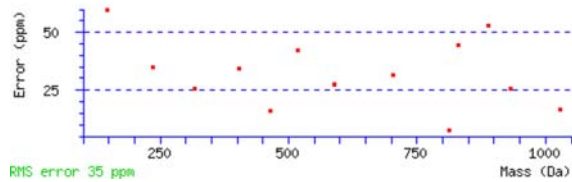

## Peptide View

MS/MS Fragmentation of **IKEEYVAEMGAPHGSASVR**

Found in [gi|21539593|ref|NP\\_079654.1](#), interferon induced transmembrane protein 3 [Mus musculus]

Match to Query 687: 2169.104472 from(724,042100,3+)

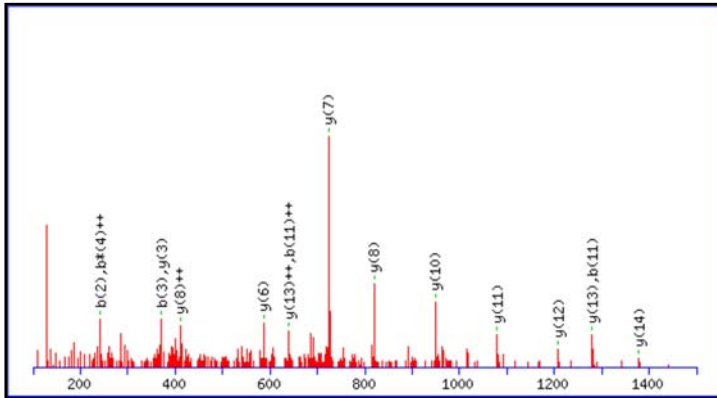

Monoisotopic mass of neutral peptide  $M_r(\text{calc})$ : 2169.0652

Variable modifications:

R20 : Arginine-13C615N4 (R-full)

Ions Score: 75 Expect: 0.00019

Matches (**Bold Red**): 16/218 fragment ions using 17 most intense peaks

| #  | b                | b <sup>++</sup> | b*        | b* <sup>++</sup> | b <sup>0</sup> | b <sup>0++</sup> | Seq. | y                | y <sup>++</sup> | y*        | y* <sup>++</sup> | y <sup>0</sup> | y <sup>0++</sup> | #  |
|----|------------------|-----------------|-----------|------------------|----------------|------------------|------|------------------|-----------------|-----------|------------------|----------------|------------------|----|
| 1  | 114.0913         | 57.5493         |           |                  |                |                  | I    |                  |                 |           |                  |                |                  | 20 |
| 2  | <b>242.1863</b>  | 121.5968        | 225.1597  | 113.0835         |                |                  | K    | 2056.9884        | 1028.9979       | 2039.9619 | 1020.4846        | 2038.9779      | 1019.9926        | 19 |
| 3  | <b>371.2289</b>  | 186.1181        | 354.2023  | 177.6048         | 353.2183       | 177.1128         | E    | 1928.8935        | 964.9504        | 1911.8669 | 956.4371         | 1910.8829      | 955.9451         | 18 |
| 4  | 500.2715         | 250.6394        | 483.2449  | <b>242.1261</b>  | 482.2609       | 241.6341         | E    | 1799.8509        | 900.4291        | 1782.8243 | 891.9158         | 1781.8403      | 891.4238         | 17 |
| 5  | 663.3348         | 332.1710        | 646.3083  | 323.6578         | 645.3242       | 323.1658         | Y    | 1670.8083        | 835.9078        | 1653.7817 | 827.3945         | 1652.7977      | 826.9025         | 16 |
| 6  | 792.3774         | 396.6923        | 775.3508  | 388.1791         | 774.3668       | 387.6871         | E    | 1507.7450        | 754.3761        | 1490.7184 | 745.8628         | 1489.7344      | 745.3708         | 15 |
| 7  | 891.4458         | 446.2265        | 874.4193  | 437.7133         | 873.4352       | 437.2213         | V    | <b>1378.7024</b> | 689.8548        | 1361.6758 | 681.3416         | 1360.6918      | 680.8495         | 14 |
| 8  | 962.4829         | 481.7451        | 945.4564  | 473.2318         | 944.4724       | 472.7398         | A    | <b>1279.6340</b> | <b>640.3206</b> | 1262.6074 | 631.8073         | 1261.6234      | 631.3153         | 13 |
| 9  | 1091.5255        | 546.2664        | 1074.4990 | 537.7531         | 1073.5149      | 537.2611         | E    | <b>1208.5969</b> | 604.8021        | 1191.5703 | 596.2888         | 1190.5863      | 595.7968         | 12 |
| 10 | 1222.5660        | 611.7866        | 1205.5394 | 603.2734         | 1204.5554      | 602.7813         | M    | <b>1079.5543</b> | 540.2808        | 1062.5277 | 531.7675         | 1061.5437      | 531.2755         | 11 |
| 11 | <b>1279.5874</b> | <b>640.2974</b> | 1262.5609 | 631.7841         | 1261.5769      | 631.2921         | G    | <b>948.5138</b>  | 474.7605        | 931.4872  | 466.2473         | 930.5032       | 465.7552         | 10 |
| 12 | 1350.6246        | 675.8159        | 1333.5980 | 667.3026         | 1332.6140      | 666.8106         | A    | 891.4923         | 446.2498        | 874.4658  | 437.7365         | 873.4818       | 437.2445         | 9  |
| 13 | 1447.6773        | 724.3423        | 1430.6508 | 715.8290         | 1429.6668      | 715.3370         | P    | <b>820.4552</b>  | <b>410.7312</b> | 803.4287  | 402.2180         | 802.4447       | 401.7260         | 8  |
| 14 | 1584.7362        | 792.8718        | 1567.7097 | 784.3585         | 1566.7257      | 783.8665         | H    | <b>723.4025</b>  | 362.2049        | 706.3759  | 353.6916         | 705.3919       | 353.1996         | 7  |
| 15 | 1641.7577        | 821.3825        | 1624.7311 | 812.8692         | 1623.7471      | 812.3772         | G    | <b>586.3435</b>  | 293.6754        | 569.3170  | 285.1621         | 568.3330       | 284.6701         | 6  |
| 16 | 1728.7897        | 864.8985        | 1711.7632 | 856.3852         | 1710.7792      | 855.8932         | S    | 529.3221         | 265.1647        | 512.2955  | 256.6514         | 511.3115       | 256.1594         | 5  |
| 17 | 1799.8268        | 900.4171        | 1782.8003 | 891.9038         | 1781.8163      | 891.4118         | A    | 442.2901         | 221.6487        | 425.2635  | 213.1354         | 424.2795       | 212.6434         | 4  |
| 18 | 1886.8589        | 943.9331        | 1869.8323 | 935.4198         | 1868.8483      | 934.9278         | S    | <b>371.2529</b>  | 186.1301        | 354.2264  | 177.6168         | 353.2424       | 177.1248         | 3  |
| 19 | 1985.9273        | 993.4673        | 1968.9007 | 984.9540         | 1967.9167      | 984.4620         | V    | 284.2209         | 142.6141        | 267.1944  | 134.1008         |                |                  | 2  |
| 20 |                  |                 |           |                  |                |                  | R    | 185.1525         | 93.0799         | 168.1260  | 84.5666          |                |                  | 1  |

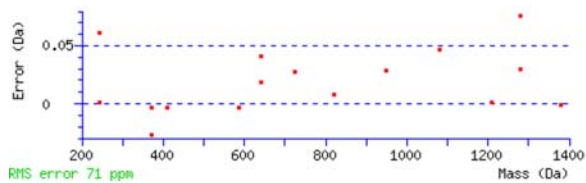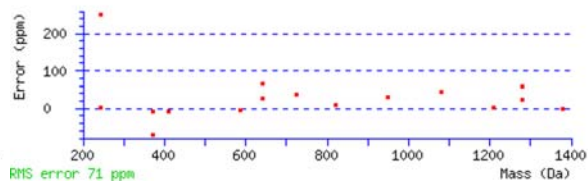

## Peptide View

MS/MS Fragmentation of **ILADLEDYLNELWEDKEGK**

Found in [gi|22203755|ref|NP\\_666312.1](#), eukaryotic translation initiation factor 3, subunit 8 [Mus musculus]

Match to Query 1195: 2292.253272 from(765.091700,3+)

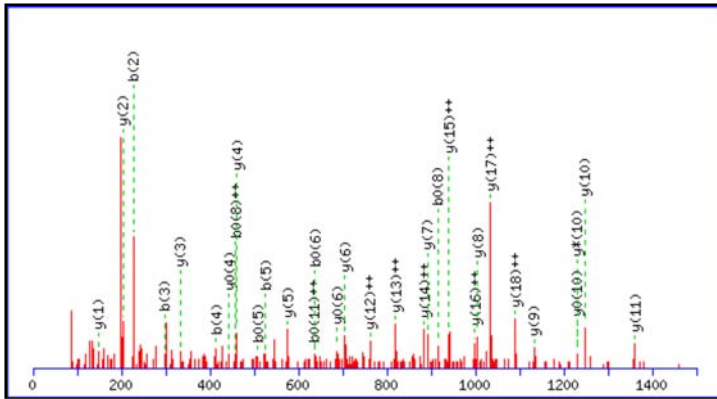

Monoisotopic mass of neutral peptide  $M_r(\text{calc})$ : 2292.1161

Ions Score: 51 Expect: 0.049

Matches (**Bold Red**): 31/188 fragment ions using 94 most intense peaks

| #  | b               | b <sup>++</sup> | b*        | b* <sup>++</sup> | b <sup>0</sup>  | b <sup>0++</sup> | Seq. | y                | y <sup>++</sup>  | y*               | y* <sup>++</sup> | y <sup>0</sup>   | y <sup>0++</sup> | #  |
|----|-----------------|-----------------|-----------|------------------|-----------------|------------------|------|------------------|------------------|------------------|------------------|------------------|------------------|----|
| 1  | 114.0913        | 57.5493         |           |                  |                 |                  | I    |                  |                  |                  |                  |                  |                  | 19 |
| 2  | <b>227.1754</b> | 114.0913        |           |                  |                 |                  | L    | 2180.0393        | <b>1090.5233</b> | 2163.0128        | 1082.0100        | 2162.0288        | 1081.5180        | 18 |
| 3  | <b>298.2125</b> | 149.6099        |           |                  |                 |                  | A    | 2066.9553        | <b>1033.9813</b> | 2049.9287        | 1025.4680        | 2048.9447        | 1024.9760        | 17 |
| 4  | <b>413.2394</b> | 207.1234        |           |                  | 395.2289        | 198.1181         | D    | 1995.9182        | <b>998.4627</b>  | 1978.8916        | 989.9494         | 1977.9076        | 989.4574         | 16 |
| 5  | <b>526.3235</b> | 263.6654        |           |                  | <b>508.3129</b> | 254.6601         | L    | 1880.8912        | <b>940.9492</b>  | 1863.8647        | 932.4360         | 1862.8806        | 931.9440         | 15 |
| 6  | 655.3661        | 328.1867        |           |                  | <b>637.3555</b> | 319.1814         | E    | 1767.8072        | <b>884.4072</b>  | 1750.7806        | 875.8939         | 1749.7966        | 875.4019         | 14 |
| 7  | 770.3930        | 385.7002        |           |                  | 752.3825        | 376.6949         | D    | 1638.7646        | <b>819.8859</b>  | 1621.7380        | 811.3726         | 1620.7540        | 810.8806         | 13 |
| 8  | 933.4564        | 467.2318        |           |                  | <b>915.4458</b> | <b>458.2265</b>  | Y    | 1523.7376        | <b>762.3724</b>  | 1506.7111        | 753.8592         | 1505.7271        | 753.3672         | 12 |
| 9  | 1046.5404       | 523.7739        |           |                  | 1028.5299       | 514.7686         | L    | <b>1360.6743</b> | 680.8408         | 1343.6477        | 672.3275         | 1342.6637        | 671.8355         | 11 |
| 10 | 1160.5834       | 580.7953        | 1143.5568 | 572.2820         | 1142.5728       | 571.7900         | N    | <b>1247.5902</b> | 624.2988         | <b>1230.5637</b> | 615.7855         | <b>1229.5797</b> | 615.2935         | 10 |
| 11 | 1289.6259       | 645.3166        | 1272.5994 | 636.8033         | 1271.6154       | <b>636.3113</b>  | E    | <b>1133.5473</b> | 567.2773         | 1116.5208        | 558.7640         | 1115.5367        | 558.2720         | 9  |
| 12 | 1402.7100       | 701.8586        | 1385.6835 | 693.3454         | 1384.6994       | 692.8534         | L    | <b>1004.5047</b> | 502.7560         | 987.4782         | 494.2427         | 986.4941         | 493.7507         | 8  |
| 13 | 1588.7893       | 794.8983        | 1571.7628 | 786.3850         | 1570.7788       | 785.8930         | W    | <b>891.4207</b>  | 446.2140         | 874.3941         | 437.7007         | 873.4101         | 437.2087         | 7  |
| 14 | 1717.8319       | 859.4196        | 1700.8054 | 850.9063         | 1699.8213       | 850.4143         | E    | <b>705.3413</b>  | 353.1743         | 688.3148         | 344.6610         | <b>687.3308</b>  | 344.1690         | 6  |
| 15 | 1832.8588       | 916.9331        | 1815.8323 | 908.4198         | 1814.8483       | 907.9278         | D    | <b>576.2988</b>  | 288.6530         | 559.2722         | 280.1397         | 558.2882         | 279.6477         | 5  |
| 16 | 1960.9538       | 980.9805        | 1943.9273 | 972.4673         | 1942.9432       | 971.9753         | K    | <b>461.2718</b>  | 231.1395         | 444.2453         | 222.6263         | <b>443.2612</b>  | 222.1343         | 4  |
| 17 | 2089.9964       | 1045.5018       | 2072.9698 | 1036.9886        | 2071.9858       | 1036.4966        | E    | <b>333.1769</b>  | 167.0921         | 316.1503         | 158.5788         | 315.1663         | 158.0868         | 3  |
| 18 | 2147.0179       | 1074.0126       | 2129.9913 | 1065.4993        | 2129.0073       | 1065.0073        | G    | <b>204.1343</b>  | 102.5708         | 187.1077         | 94.0575          |                  |                  | 2  |
| 19 |                 |                 |           |                  |                 |                  | K    | <b>147.1128</b>  | 74.0600          | 130.0863         | 65.5468          |                  |                  | 1  |

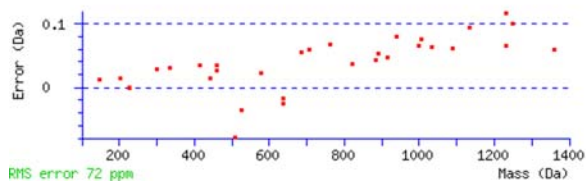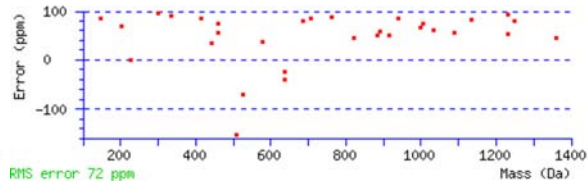

## Peptide View

MS/MS Fragmentation of **ILTFDQLALESPK**

Found in [gi|83699424|ref|NP\\_033103.2](#), ribosomal protein L18 [Mus musculus]

Match to Query 308: 1473.879648 from(737.947100,2+)

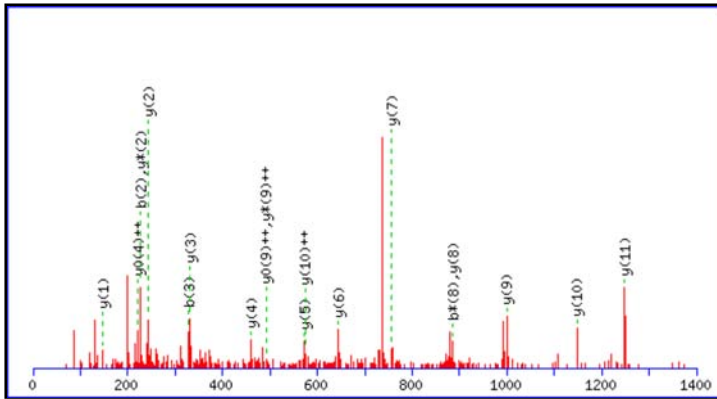

Monoisotopic mass of neutral peptide  $M_r(\text{calc})$ : 1473.8079

Ions Score: 46 Expect: 0.048

Matches (Bold Red): 19/126 fragment ions using 63 most intense peaks

| #  | b               | b <sup>++</sup> | b*              | b* <sup>++</sup> | b <sup>0</sup> | b <sup>0++</sup> | Seq. | y                | y <sup>++</sup> | y*              | y* <sup>++</sup> | y <sup>0</sup> | y <sup>0++</sup> | #  |
|----|-----------------|-----------------|-----------------|------------------|----------------|------------------|------|------------------|-----------------|-----------------|------------------|----------------|------------------|----|
| 1  | 114.0913        | 57.5493         |                 |                  |                |                  | I    |                  |                 |                 |                  |                |                  | 13 |
| 2  | <b>227.1754</b> | 114.0913        |                 |                  |                |                  | L    | 1361.7311        | 681.3692        | 1344.7045       | 672.8559         | 1343.7205      | 672.3639         | 12 |
| 3  | <b>328.2231</b> | 164.6152        |                 |                  | 310.2125       | 155.6099         | T    | <b>1248.6470</b> | 624.8271        | 1231.6205       | 616.3139         | 1230.6365      | 615.8219         | 11 |
| 4  | 475.2915        | 238.1494        |                 |                  | 457.2809       | 229.1441         | F    | <b>1147.5993</b> | <b>574.3033</b> | 1130.5728       | 565.7900         | 1129.5888      | 565.2980         | 10 |
| 5  | 590.3184        | 295.6629        |                 |                  | 572.3079       | 286.6576         | D    | <b>1000.5309</b> | 500.7691        | 983.5044        | <b>492.2558</b>  | 982.5204       | <b>491.7638</b>  | 9  |
| 6  | 718.3770        | 359.6921        | 701.3505        | 351.1789         | 700.3664       | 350.6869         | Q    | <b>885.5040</b>  | 443.2556        | 868.4774        | 434.7424         | 867.4934       | 434.2504         | 8  |
| 7  | 831.4611        | 416.2342        | 814.4345        | 407.7209         | 813.4505       | 407.2289         | L    | <b>757.4454</b>  | 379.2263        | 740.4189        | 370.7131         | 739.4348       | 370.2211         | 7  |
| 8  | 902.4982        | 451.7527        | <b>885.4716</b> | 443.2395         | 884.4876       | 442.7474         | A    | <b>644.3614</b>  | 322.6843        | 627.3348        | 314.1710         | 626.3508       | 313.6790         | 6  |
| 9  | 1015.5822       | 508.2948        | 998.5557        | 499.7815         | 997.5717       | 499.2895         | L    | <b>573.3242</b>  | 287.1658        | 556.2977        | 278.6525         | 555.3137       | 278.1605         | 5  |
| 10 | 1144.6248       | 572.8161        | 1127.5983       | 564.3028         | 1126.6143      | 563.8108         | E    | <b>460.2402</b>  | 230.6237        | 443.2136        | 222.1105         | 442.2296       | <b>221.6184</b>  | 4  |
| 11 | 1231.6569       | 616.3321        | 1214.6303       | 607.8188         | 1213.6463      | 607.3268         | S    | <b>331.1976</b>  | 166.1024        | 314.1710        | 157.5892         | 313.1870       | 157.0972         | 3  |
| 12 | 1328.7096       | 664.8584        | 1311.6831       | 656.3452         | 1310.6991      | 655.8532         | P    | <b>244.1656</b>  | 122.5864        | <b>227.1390</b> | 114.0731         |                |                  | 2  |
| 13 |                 |                 |                 |                  |                |                  | K    | <b>147.1128</b>  | 74.0600         | 130.0863        | 65.5468          |                |                  | 1  |

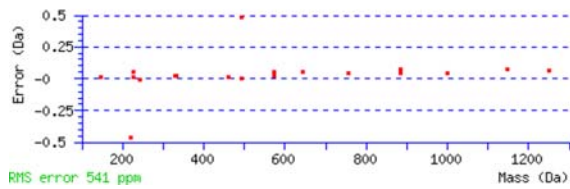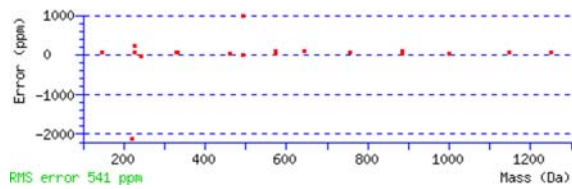

## Peptide View

MS/MS Fragmentation of **IQDALSTVLQYAEDVLSGK**

Found in **gi|21313620|ref|NP\_079620.1**, eukaryotic translation initiation factor 3, subunit 5 (epsilon) [Mus musculus]

Match to Query 1120: 2049.219648 from(1025.617100,2+)

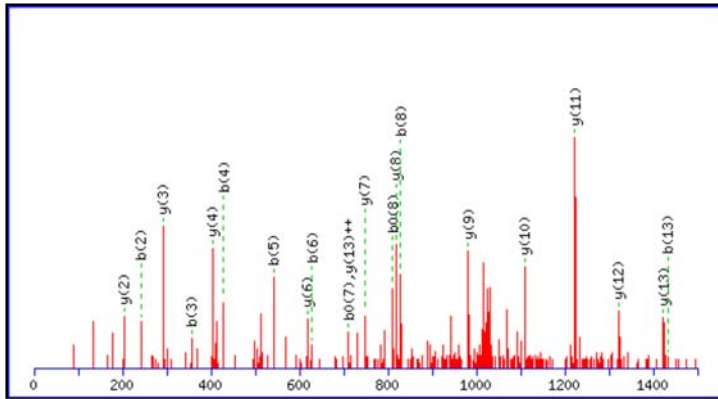

Monoisotopic mass of neutral peptide  $M_r(\text{calc})$ : 2049.0629

Ions Score: 81 Expect:  $4e-005$

Matches (**Bold Red**): 21/206 fragment ions using 41 most intense peaks

| #  | b                | b <sup>++</sup> | b*        | b* <sup>++</sup> | b <sup>0</sup>  | b <sup>0++</sup> | Seq. | y                | y <sup>++</sup> | y*        | y* <sup>++</sup> | y <sup>0</sup> | y <sup>0++</sup> | #  |
|----|------------------|-----------------|-----------|------------------|-----------------|------------------|------|------------------|-----------------|-----------|------------------|----------------|------------------|----|
| 1  | 114.0913         | 57.5493         |           |                  |                 |                  | I    |                  |                 |           |                  |                |                  | 19 |
| 2  | <b>242.1499</b>  | 121.5786        | 225.1234  | 113.0653         |                 |                  | Q    | 1936.9862        | 968.9967        | 1919.9596 | 960.4835         | 1918.9756      | 959.9914         | 18 |
| 3  | <b>357.1769</b>  | 179.0921        | 340.1503  | 170.5788         | 339.1663        | 170.0868         | D    | 1808.9276        | 904.9674        | 1791.9011 | 896.4542         | 1790.9170      | 895.9622         | 17 |
| 4  | <b>428.2140</b>  | 214.6106        | 411.1874  | 206.0973         | 410.2034        | 205.6053         | A    | 1693.9007        | 847.4540        | 1676.8741 | 838.9407         | 1675.8901      | 838.4487         | 16 |
| 5  | <b>541.2980</b>  | 271.1527        | 524.2715  | 262.6394         | 523.2875        | 262.1474         | L    | 1622.8636        | 811.9354        | 1605.8370 | 803.4221         | 1604.8530      | 802.9301         | 15 |
| 6  | <b>628.3301</b>  | 314.6687        | 611.3035  | 306.1554         | 610.3195        | 305.6634         | S    | 1509.7795        | 755.3934        | 1492.7529 | 746.8801         | 1491.7689      | 746.3881         | 14 |
| 7  | 729.3777         | 365.1925        | 712.3512  | 356.6792         | <b>711.3672</b> | 356.1872         | T    | <b>1422.7475</b> | <b>711.8774</b> | 1405.7209 | 703.3641         | 1404.7369      | 702.8721         | 13 |
| 8  | <b>828.4461</b>  | 414.7267        | 811.4196  | 406.2134         | <b>810.4356</b> | 405.7214         | V    | <b>1321.6998</b> | 661.3535        | 1304.6732 | 652.8403         | 1303.6892      | 652.3482         | 12 |
| 9  | 941.5302         | 471.2687        | 924.5037  | 462.7555         | 923.5196        | 462.2635         | L    | <b>1222.6314</b> | 611.8193        | 1205.6048 | 603.3060         | 1204.6208      | 602.8140         | 11 |
| 10 | 1069.5888        | 535.2980        | 1052.5622 | 526.7848         | 1051.5782       | 526.2927         | Q    | <b>1109.5473</b> | 555.2773        | 1092.5208 | 546.7640         | 1091.5367      | 546.2720         | 10 |
| 11 | 1232.6521        | 616.8297        | 1215.6256 | 608.3164         | 1214.6416       | 607.8244         | Y    | <b>981.4887</b>  | 491.2480        | 964.4622  | 482.7347         | 963.4782       | 482.2427         | 9  |
| 12 | 1303.6892        | 652.3483        | 1286.6627 | 643.8350         | 1285.6787       | 643.3430         | A    | <b>818.4254</b>  | 409.7163        | 801.3989  | 401.2031         | 800.4148       | 400.7111         | 8  |
| 13 | <b>1432.7318</b> | 716.8695        | 1415.7053 | 708.3563         | 1414.7213       | 707.8643         | E    | <b>747.3883</b>  | 374.1978        | 730.3617  | 365.6845         | 729.3777       | 365.1925         | 7  |
| 14 | 1547.7588        | 774.3830        | 1530.7322 | 765.8697         | 1529.7482       | 765.3777         | D    | <b>618.3457</b>  | 309.6765        | 601.3192  | 301.1632         | 600.3351       | 300.6712         | 6  |
| 15 | 1646.8272        | 823.9172        | 1629.8006 | 815.4039         | 1628.8166       | 814.9119         | V    | 503.3188         | 252.1630        | 486.2922  | 243.6497         | 485.3082       | 243.1577         | 5  |
| 16 | 1759.9112        | 880.4593        | 1742.8847 | 871.9460         | 1741.9007       | 871.4540         | L    | <b>404.2504</b>  | 202.6288        | 387.2238  | 194.1155         | 386.2398       | 193.6235         | 4  |
| 17 | 1846.9433        | 923.9753        | 1829.9167 | 915.4620         | 1828.9327       | 914.9700         | S    | <b>291.1663</b>  | 146.0868        | 274.1397  | 137.5735         | 273.1557       | 137.0815         | 3  |
| 18 | 1903.9647        | 952.4860        | 1886.9382 | 943.9727         | 1885.9542       | 943.4807         | G    | <b>204.1343</b>  | 102.5708        | 187.1077  | 94.0575          |                |                  | 2  |
| 19 |                  |                 |           |                  |                 |                  | K    | 147.1128         | 74.0600         | 130.0863  | 65.5468          |                |                  | 1  |

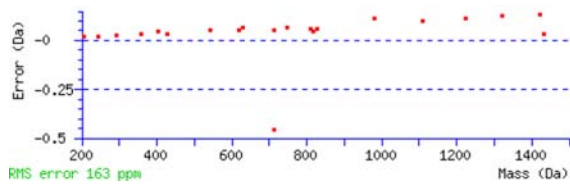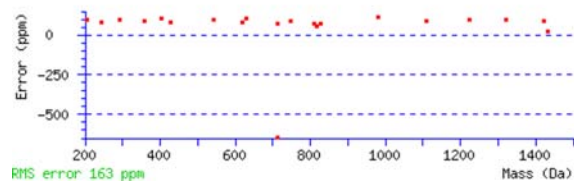



## Peptide View

MS/MS Fragmentation of **IQSLVGLSWIDWLK**

Found in [gi|29789235|ref|NP\\_083370.1](#), phosphatidylinositol 3-kinase, catalytic, beta polypeptide [Mus musculus]

Match to Query 553: 1656.942448 from(829.478500,2+)

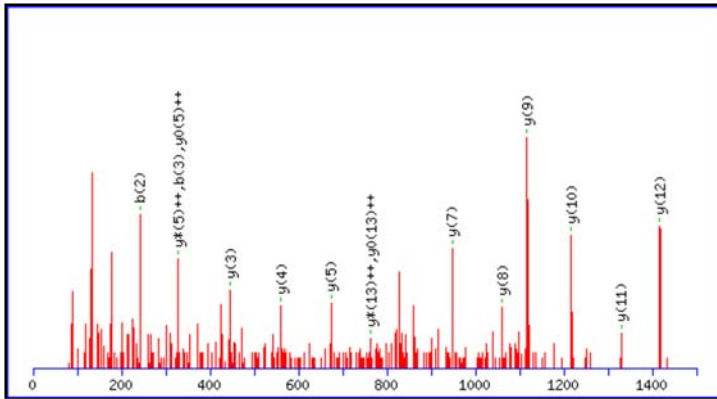

Monoisotopic mass of neutral peptide  $M_r(\text{calc})$ : 1656.9239

Ions Score: 81 Expect: 1.9e-005

Matches (**Bold Red**): 15/144 fragment ions using 21 most intense peaks

| #  | b               | b <sup>++</sup> | b*        | b* <sup>++</sup> | b <sup>0</sup> | b <sup>0++</sup> | Seq. | y                | y <sup>++</sup> | y*        | y* <sup>++</sup> | y <sup>0</sup> | y <sup>0++</sup> | #  |
|----|-----------------|-----------------|-----------|------------------|----------------|------------------|------|------------------|-----------------|-----------|------------------|----------------|------------------|----|
| 1  | 114.0913        | 57.5493         |           |                  |                |                  | I    |                  |                 |           |                  |                |                  | 14 |
| 2  | <b>242.1499</b> | 121.5786        | 225.1234  | 113.0653         |                |                  | Q    | 1544.8471        | 772.9272        | 1527.8206 | <b>764.4139</b>  | 1526.8365      | <b>763.9219</b>  | 13 |
| 3  | <b>329.1819</b> | 165.0946        | 312.1554  | 156.5813         | 311.1714       | 156.0893         | S    | <b>1416.7885</b> | 708.8979        | 1399.7620 | 700.3846         | 1398.7780      | 699.8926         | 12 |
| 4  | 442.2660        | 221.6366        | 425.2395  | 213.1234         | 424.2554       | 212.6314         | L    | <b>1329.7565</b> | 665.3819        | 1312.7300 | 656.8686         | 1311.7459      | 656.3766         | 11 |
| 5  | 541.3344        | 271.1708        | 524.3079  | 262.6576         | 523.3239       | 262.1656         | V    | <b>1216.6724</b> | 608.8399        | 1199.6459 | 600.3266         | 1198.6619      | 599.8346         | 10 |
| 6  | 598.3559        | 299.6816        | 581.3293  | 291.1683         | 580.3453       | 290.6763         | G    | <b>1117.6040</b> | 559.3057        | 1100.5775 | 550.7924         | 1099.5935      | 550.3004         | 9  |
| 7  | 711.4399        | 356.2236        | 694.4134  | 347.7103         | 693.4294       | 347.2183         | L    | <b>1060.5826</b> | 530.7949        | 1043.5560 | 522.2816         | 1042.5720      | 521.7896         | 8  |
| 8  | 798.4720        | 399.7396        | 781.4454  | 391.2263         | 780.4614       | 390.7343         | S    | <b>947.4985</b>  | 474.2529        | 930.4720  | 465.7396         | 929.4879       | 465.2476         | 7  |
| 9  | 984.5513        | 492.7793        | 967.5247  | 484.2660         | 966.5407       | 483.7740         | W    | 860.4665         | 430.7369        | 843.4399  | 422.2236         | 842.4559       | 421.7316         | 6  |
| 10 | 1097.6353       | 549.3213        | 1080.6088 | 540.8080         | 1079.6248      | 540.3160         | I    | <b>674.3872</b>  | 337.6972        | 657.3606  | <b>329.1839</b>  | 656.3766       | <b>328.6919</b>  | 5  |
| 11 | 1212.6623       | 606.8348        | 1195.6357 | 598.3215         | 1194.6517      | 597.8295         | D    | <b>561.3031</b>  | 281.1552        | 544.2766  | 272.6419         | 543.2925       | 272.1499         | 4  |
| 12 | 1398.7416       | 699.8744        | 1381.7150 | 691.3612         | 1380.7310      | 690.8691         | W    | <b>446.2762</b>  | 223.6417        | 429.2496  | 215.1284         |                |                  | 3  |
| 13 | 1511.8256       | 756.4165        | 1494.7991 | 747.9032         | 1493.8151      | 747.4112         | L    | 260.1969         | 130.6021        | 243.1703  | 122.0888         |                |                  | 2  |
| 14 |                 |                 |           |                  |                |                  | K    | 147.1128         | 74.0600         | 130.0863  | 65.5468          |                |                  | 1  |

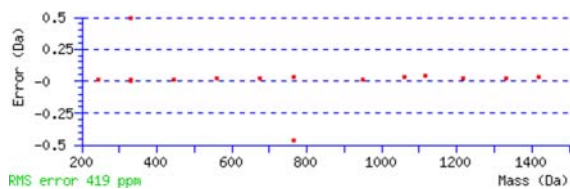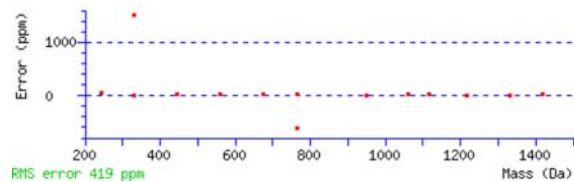

## Peptide View

MS/MS Fragmentation of **ISNNNNGLTEVLK**

Found in [gi|27370424|ref|NP\\_766512.1](#), hypothetical protein LOC244895 [Mus musculus]

Match to Query 270: 1414.802048 from(708.408300,2+)

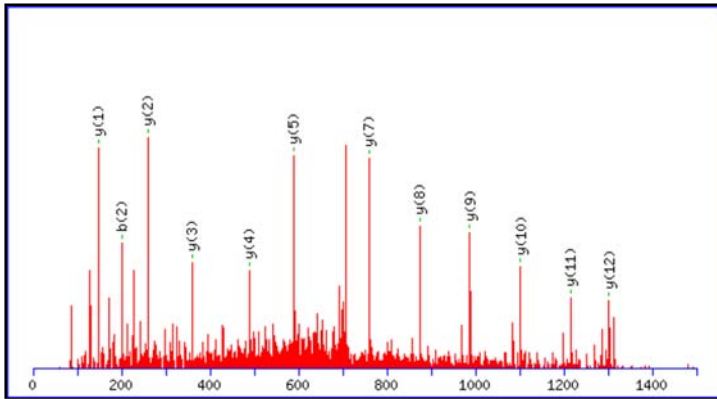

Monoisotopic mass of neutral peptide  $M_r(\text{calc})$ : 1414.7415

Ions Score: 110 Expect: 1.8e-008

Matches (**Bold Red**): 12/132 fragment ions using 24 most intense peaks

| #  | b               | b <sup>++</sup> | b*        | b <sup>*++</sup> | b <sup>0</sup> | b <sup>0++</sup> | Seq. | y                | y <sup>++</sup> | y*        | y <sup>*++</sup> | y <sup>0</sup> | y <sup>0++</sup> | #  |
|----|-----------------|-----------------|-----------|------------------|----------------|------------------|------|------------------|-----------------|-----------|------------------|----------------|------------------|----|
| 1  | 114.0913        | 57.5493         |           |                  |                |                  | I    |                  |                 |           |                  |                |                  | 13 |
| 2  | <b>201.1234</b> | 101.0653        |           |                  | 183.1128       | 92.0600          | S    | <b>1302.6648</b> | 651.8360        | 1285.6383 | 643.3228         | 1284.6542      | 642.8308         | 12 |
| 3  | 315.1663        | 158.0868        | 298.1397  | 149.5735         | 297.1557       | 149.0815         | N    | <b>1215.6328</b> | 608.3200        | 1198.6062 | 599.8068         | 1197.6222      | 599.3147         | 11 |
| 4  | 429.2092        | 215.1083        | 412.1827  | 206.5950         | 411.1987       | 206.1030         | N    | <b>1101.5899</b> | 551.2986        | 1084.5633 | 542.7853         | 1083.5793      | 542.2933         | 10 |
| 5  | 543.2522        | 272.1297        | 526.2256  | 263.6164         | 525.2416       | 263.1244         | N    | <b>987.5469</b>  | 494.2771        | 970.5204  | 485.7638         | 969.5364       | 485.2718         | 9  |
| 6  | 657.2951        | 329.1512        | 640.2685  | 320.6379         | 639.2845       | 320.1459         | N    | <b>873.5040</b>  | 437.2556        | 856.4774  | 428.7424         | 855.4934       | 428.2504         | 8  |
| 7  | 714.3165        | 357.6619        | 697.2900  | 349.1486         | 696.3060       | 348.6566         | G    | <b>759.4611</b>  | 380.2342        | 742.4345  | 371.7209         | 741.4505       | 371.2289         | 7  |
| 8  | 827.4006        | 414.2039        | 810.3741  | 405.6907         | 809.3900       | 405.1987         | L    | 702.4396         | 351.7234        | 685.4131  | 343.2102         | 684.4290       | 342.7182         | 6  |
| 9  | 928.4483        | 464.7278        | 911.4217  | 456.2145         | 910.4377       | 455.7225         | T    | <b>589.3555</b>  | 295.1814        | 572.3290  | 286.6681         | 571.3450       | 286.1761         | 5  |
| 10 | 1057.4909       | 529.2491        | 1040.4643 | 520.7358         | 1039.4803      | 520.2438         | E    | <b>488.3079</b>  | 244.6576        | 471.2813  | 236.1443         | 470.2973       | 235.6523         | 4  |
| 11 | 1156.5593       | 578.7833        | 1139.5327 | 570.2700         | 1138.5487      | 569.7780         | V    | <b>359.2653</b>  | 180.1363        | 342.2387  | 171.6230         |                |                  | 3  |
| 12 | 1269.6433       | 635.3253        | 1252.6168 | 626.8120         | 1251.6328      | 626.3200         | L    | <b>260.1969</b>  | 130.6021        | 243.1703  | 122.0888         |                |                  | 2  |
| 13 |                 |                 |           |                  |                |                  | K    | <b>147.1128</b>  | 74.0600         | 130.0863  | 65.5468          |                |                  | 1  |

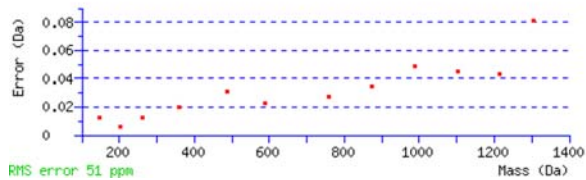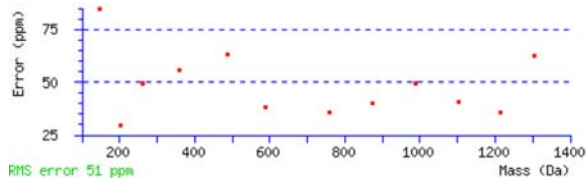

## Peptide View

MS/MS Fragmentation of **KLEAAATALATK**

Found in [gi|30794450|ref|NP\\_077174.1](#), ribosomal protein L4 [Mus musculus]

Match to Query 213: 1186.750848 from(594.382700,2+)

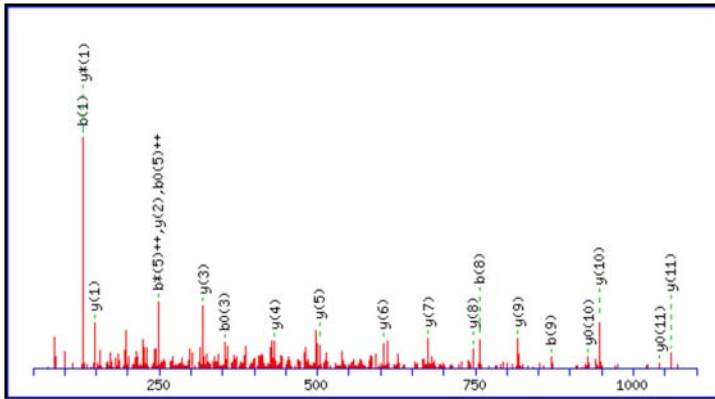

Monoisotopic mass of neutral peptide  $M_r(\text{calc})$ : 1186.6921

Ions Score: 92 Expect: 8.8e-007

Matches (Bold Red): 21/126 fragment ions using 34 most intense peaks

| #  | b                | b <sup>++</sup> | b*        | b* <sup>++</sup> | b <sup>0</sup>  | b <sup>0++</sup> | Seq. | y                | y <sup>++</sup> | y*              | y* <sup>++</sup> | y <sup>0</sup>   | y <sup>0++</sup> | #  |
|----|------------------|-----------------|-----------|------------------|-----------------|------------------|------|------------------|-----------------|-----------------|------------------|------------------|------------------|----|
| 1  | <b>129.1022</b>  | 65.0548         | 112.0757  | 56.5415          |                 |                  | K    |                  |                 |                 |                  |                  |                  | 12 |
| 2  | 242.1863         | 121.5968        | 225.1597  | 113.0835         |                 |                  | L    | <b>1059.6044</b> | 530.3058        | 1042.5779       | 521.7926         | <b>1041.5939</b> | 521.3006         | 11 |
| 3  | 371.2289         | 186.1181        | 354.2023  | 177.6048         | <b>353.2183</b> | 177.1128         | E    | <b>946.5204</b>  | 473.7638        | 929.4938        | 465.2505         | <b>928.5098</b>  | 464.7585         | 10 |
| 4  | 442.2660         | 221.6366        | 425.2394  | 213.1234         | 424.2554        | 212.6314         | A    | <b>817.4778</b>  | 409.2425        | 800.4512        | 400.7292         | 799.4672         | 400.2372         | 9  |
| 5  | 513.3031         | 257.1552        | 496.2766  | <b>248.6419</b>  | 495.2925        | <b>248.1499</b>  | A    | <b>746.4407</b>  | 373.7240        | 729.4141        | 365.2107         | 728.4301         | 364.7187         | 8  |
| 6  | 584.3402         | 292.6737        | 567.3137  | 284.1605         | 566.3297        | 283.6685         | A    | <b>675.4036</b>  | 338.2054        | 658.3770        | 329.6921         | 657.3930         | 329.2001         | 7  |
| 7  | 685.3879         | 343.1976        | 668.3613  | 334.6843         | 667.3773        | 334.1923         | T    | <b>604.3664</b>  | 302.6869        | 587.3399        | 294.1736         | 586.3559         | 293.6816         | 6  |
| 8  | <b>756.4250</b>  | 378.7161        | 739.3985  | 370.2029         | 738.4144        | 369.7109         | A    | <b>503.3188</b>  | 252.1630        | 486.2922        | 243.6497         | 485.3082         | 243.1577         | 5  |
| 9  | <b>869.5091</b>  | 435.2582        | 852.4825  | 426.7449         | 851.4985        | 426.2529         | L    | <b>432.2817</b>  | 216.6445        | 415.2551        | 208.1312         | 414.2711         | 207.6392         | 4  |
| 10 | 940.5462         | 470.7767        | 923.5196  | 462.2635         | 922.5356        | 461.7714         | A    | <b>319.1976</b>  | 160.1024        | 302.1710        | 151.5892         | 301.1870         | 151.0972         | 3  |
| 11 | <b>1041.5939</b> | 521.3006        | 1024.5673 | 512.7873         | 1023.5833       | 512.2953         | T    | <b>248.1605</b>  | 124.5839        | 231.1339        | 116.0706         | 230.1499         | 115.5786         | 2  |
| 12 |                  |                 |           |                  |                 |                  | K    | <b>147.1128</b>  | 74.0600         | <b>130.0863</b> | 65.5468          |                  |                  | 1  |

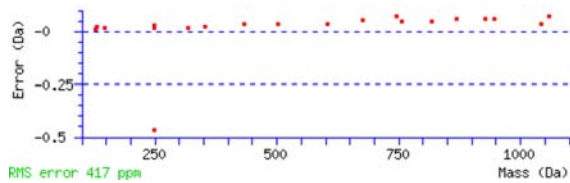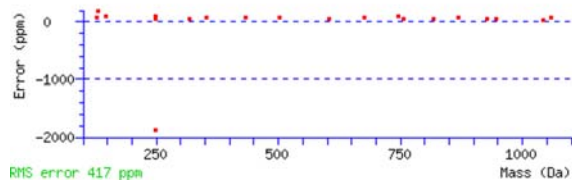

## Peptide View

MS/MS Fragmentation of **KLQEEELLATHVDMR**

Found in [gi|71043975|ref|NP\\_080478.2](#), Ymer protein isoform 1 [Mus musculus]

Match to Query 595: 1810.970772 from(604.664200,3+)

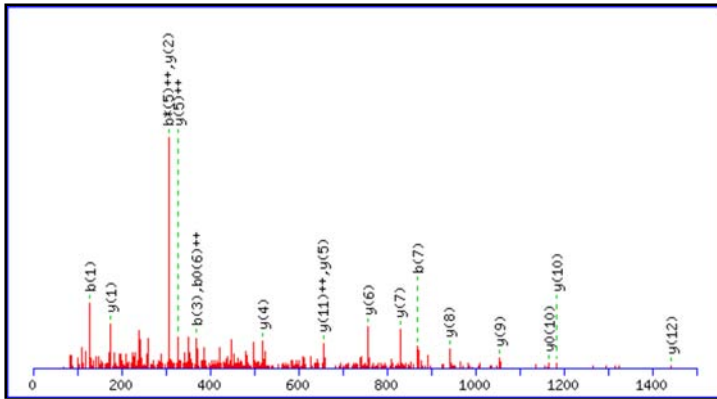

Monoisotopic mass of neutral peptide Mr(calc): 1810.9247

Ions Score: 84 Expect: 1.1e-005

Matches (Bold Red): 18/158 fragment ions using 22 most intense peaks

| #  | b               | b <sup>++</sup> | b*        | b* <sup>++</sup> | b <sup>0</sup> | b <sup>0++</sup> | Seq. | y                | y <sup>++</sup> | y*        | y* <sup>++</sup> | y <sup>0</sup>   | y <sup>0++</sup> | #  |
|----|-----------------|-----------------|-----------|------------------|----------------|------------------|------|------------------|-----------------|-----------|------------------|------------------|------------------|----|
| 1  | <b>129.1022</b> | 65.0548         | 112.0757  | 56.5415          |                |                  | K    |                  |                 |           |                  |                  |                  | 15 |
| 2  | 242.1863        | 121.5968        | 225.1597  | 113.0835         |                |                  | L    | 1683.8370        | 842.4221        | 1666.8105 | 833.9089         | 1665.8264        | 833.4169         | 14 |
| 3  | <b>370.2449</b> | 185.6261        | 353.2183  | 177.1128         |                |                  | Q    | 1570.7530        | 785.8801        | 1553.7264 | 777.3668         | 1552.7424        | 776.8748         | 13 |
| 4  | 499.2875        | 250.1474        | 482.2609  | 241.6341         | 481.2769       | 241.1421         | E    | <b>1442.6944</b> | 721.8508        | 1425.6678 | 713.3375         | 1424.6838        | 712.8455         | 12 |
| 5  | 628.3301        | 314.6687        | 611.3035  | <b>306.1554</b>  | 610.3195       | 305.6634         | E    | 1313.6518        | <b>657.3295</b> | 1296.6252 | 648.8163         | 1295.6412        | 648.3242         | 11 |
| 6  | 757.3726        | 379.1900        | 740.3461  | 370.6767         | 739.3621       | <b>370.1847</b>  | E    | <b>1184.6092</b> | 592.8082        | 1167.5826 | 584.2950         | <b>1166.5986</b> | 583.8030         | 10 |
| 7  | <b>870.4567</b> | 435.7320        | 853.4302  | 427.2187         | 852.4461       | 426.7267         | L    | <b>1055.5666</b> | 528.2869        | 1038.5401 | 519.7737         | 1037.5560        | 519.2817         | 9  |
| 8  | 983.5408        | 492.2740        | 966.5142  | 483.7607         | 965.5302       | 483.2687         | L    | <b>942.4825</b>  | 471.7449        | 925.4560  | 463.2316         | 924.4720         | 462.7396         | 8  |
| 9  | 1054.5779       | 527.7926        | 1037.5513 | 519.2793         | 1036.5673      | 518.7873         | A    | <b>829.3985</b>  | 415.2029        | 812.3719  | 406.6896         | 811.3879         | 406.1976         | 7  |
| 10 | 1155.6256       | 578.3164        | 1138.5990 | 569.8031         | 1137.6150      | 569.3111         | T    | <b>758.3614</b>  | 379.6843        | 741.3348  | 371.1710         | 740.3508         | 370.6790         | 6  |
| 11 | 1292.6845       | 646.8459        | 1275.6579 | 638.3326         | 1274.6739      | 637.8406         | H    | <b>657.3137</b>  | <b>329.1605</b> | 640.2871  | 320.6472         | 639.3031         | 320.1552         | 5  |
| 12 | 1391.7529       | 696.3801        | 1374.7263 | 687.8668         | 1373.7423      | 687.3748         | V    | <b>520.2548</b>  | 260.6310        | 503.2282  | 252.1178         | 502.2442         | 251.6257         | 4  |
| 13 | 1506.7798       | 753.8935        | 1489.7533 | 745.3803         | 1488.7693      | 744.8883         | D    | 421.1864         | 211.0968        | 404.1598  | 202.5835         | 403.1758         | 202.0915         | 3  |
| 14 | 1637.8203       | 819.4138        | 1620.7937 | 810.9005         | 1619.8097      | 810.4085         | M    | <b>306.1594</b>  | 153.5834        | 289.1329  | 145.0701         |                  |                  | 2  |
| 15 |                 |                 |           |                  |                |                  | R    | <b>175.1190</b>  | 88.0631         | 158.0924  | 79.5498          |                  |                  | 1  |

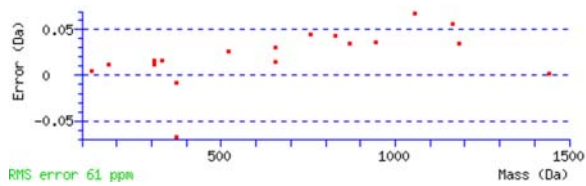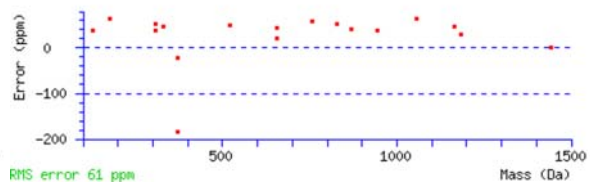

## Peptide View

MS/MS Fragmentation of **KLWMSLGDSWK**

Found in [gi|75677397|ref|NP\\_031971.2](#), epidermal growth factor receptor pathway substrate 8 [Mus musculus]

Match to Query 445: 1448.758248 from(725.386400,2+)

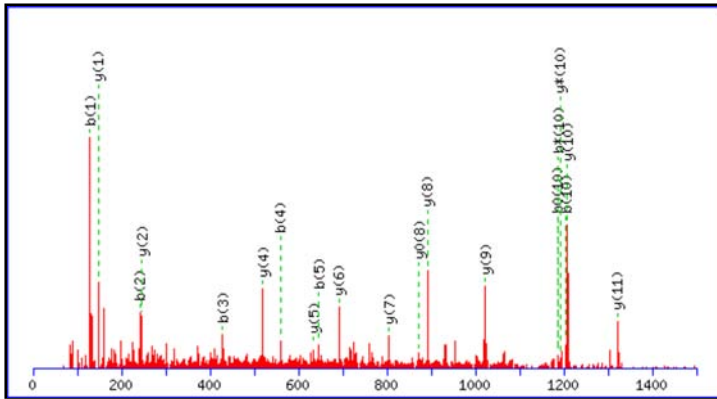

Monoisotopic mass of neutral peptide  $M_r(\text{calc})$ : 1448.7486

Ions Score: 66 Expect: 0.00042

Matches (Bold Red): 20/118 fragment ions using 52 most intense peaks

| #  | b                | b <sup>++</sup> | b*               | b* <sup>++</sup> | b <sup>0</sup>   | b <sup>0++</sup> | Seq. | y                | y <sup>++</sup> | y*               | y* <sup>++</sup> | y <sup>0</sup>  | y <sup>0++</sup> | #  |
|----|------------------|-----------------|------------------|------------------|------------------|------------------|------|------------------|-----------------|------------------|------------------|-----------------|------------------|----|
| 1  | <b>129.1022</b>  | 65.0548         | 112.0757         | 56.5415          |                  |                  | K    |                  |                 |                  |                  |                 |                  | 12 |
| 2  | <b>242.1863</b>  | 121.5968        | 225.1597         | 113.0835         |                  |                  | L    | <b>1321.6609</b> | 661.3341        | 1304.6343        | 652.8208         | 1303.6503       | 652.3288         | 11 |
| 3  | <b>428.2656</b>  | 214.6364        | 411.2391         | 206.1232         |                  |                  | W    | <b>1208.5768</b> | 604.7921        | <b>1191.5503</b> | 596.2788         | 1190.5663       | 595.7868         | 10 |
| 4  | <b>559.3061</b>  | 280.1567        | 542.2795         | 271.6434         |                  |                  | M    | <b>1022.4975</b> | 511.7524        | 1005.4710        | 503.2391         | 1004.4870       | 502.7471         | 9  |
| 5  | <b>646.3381</b>  | 323.6727        | 629.3116         | 315.1594         | 628.3276         | 314.6674         | S    | <b>891.4570</b>  | 446.2322        | 874.4305         | 437.7189         | <b>873.4465</b> | 437.2269         | 8  |
| 6  | 759.4222         | 380.2147        | 742.3956         | 371.7015         | 741.4116         | 371.2094         | L    | <b>804.4250</b>  | 402.7161        | 787.3985         | 394.2029         | 786.4144        | 393.7109         | 7  |
| 7  | 816.4436         | 408.7255        | 799.4171         | 400.2122         | 798.4331         | 399.7202         | G    | <b>691.3410</b>  | 346.1741        | 674.3144         | 337.6608         | 673.3304        | 337.1688         | 6  |
| 8  | 931.4706         | 466.2389        | 914.4440         | 457.7257         | 913.4600         | 457.2336         | D    | <b>634.3195</b>  | 317.6634        | 617.2929         | 309.1501         | 616.3089        | 308.6581         | 5  |
| 9  | 1018.5026        | 509.7549        | 1001.4761        | 501.2417         | 1000.4920        | 500.7497         | S    | <b>519.2926</b>  | 260.1499        | 502.2660         | 251.6366         | 501.2820        | 251.1446         | 4  |
| 10 | <b>1204.5819</b> | 602.7946        | <b>1187.5554</b> | 594.2813         | <b>1186.5714</b> | 593.7893         | W    | 432.2605         | 216.6339        | 415.2340         | 208.1206         |                 |                  | 3  |
| 11 | 1303.6503        | 652.3288        | 1286.6238        | 643.8155         | 1285.6398        | 643.3235         | V    | <b>246.1812</b>  | 123.5942        | 229.1547         | 115.0810         |                 |                  | 2  |
| 12 |                  |                 |                  |                  |                  |                  | K    | <b>147.1128</b>  | 74.0600         | 130.0863         | 65.5468          |                 |                  | 1  |

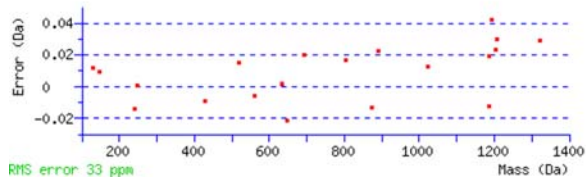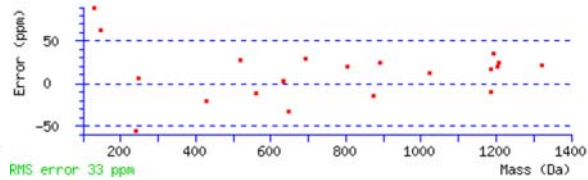

## Peptide View

MS/MS Fragmentation of **KPLFGEIGHTIMNLLVDLR**

Found in [gi|27734996|ref|NP\\_775568.1](#), zinc finger, FYVE domain containing 16 [Mus musculus]

Match to Query 534: 2171.328072 from(724.783300,3+)

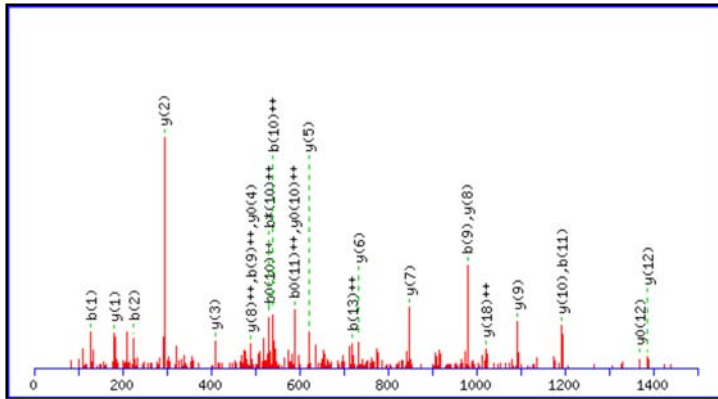

Monoisotopic mass of neutral peptide  $M_r(\text{calc})$ : 2171.2231

Variable modifications:

R19 : Arginine-13C6 (R-13C6)

Ions Score: 64 Expect: 0.0021

Matches (**Bold Red**): 25/202 fragment ions using 37 most intense peaks

| #  | b                | b <sup>++</sup> | b*        | b* <sup>++</sup> | b <sup>0</sup> | b <sup>0++</sup> | Seq. | y                | y <sup>++</sup>  | y*        | y* <sup>++</sup> | y <sup>0</sup>   | y <sup>0++</sup> | #  |
|----|------------------|-----------------|-----------|------------------|----------------|------------------|------|------------------|------------------|-----------|------------------|------------------|------------------|----|
| 1  | <b>129.1022</b>  | 65.0548         | 112.0757  | 56.5415          |                |                  | K    |                  |                  |           |                  |                  |                  | 19 |
| 2  | <b>226.1550</b>  | 113.5811        | 209.1284  | 105.0679         |                |                  | P    | 2044.1355        | <b>1022.5714</b> | 2027.1089 | 1014.0581        | 2026.1249        | 1013.5661        | 18 |
| 3  | 339.2391         | 170.1232        | 322.2125  | 161.6099         |                |                  | L    | 1947.0827        | 974.0450         | 1930.0562 | 965.5317         | 1929.0721        | 965.0397         | 17 |
| 4  | 486.3075         | 243.6574        | 469.2809  | 235.1441         |                |                  | F    | 1833.9986        | 917.5030         | 1816.9721 | 908.9897         | 1815.9881        | 908.4977         | 16 |
| 5  | 543.3289         | 272.1681        | 526.3024  | 263.6548         |                |                  | G    | 1686.9302        | 843.9688         | 1669.9037 | 835.4555         | 1668.9197        | 834.9635         | 15 |
| 6  | 672.3715         | 336.6894        | 655.3450  | 328.1761         | 654.3610       | 327.6841         | E    | 1629.9088        | 815.4580         | 1612.8822 | 806.9448         | 1611.8982        | 806.4527         | 14 |
| 7  | 785.4556         | 393.2314        | 768.4290  | 384.7182         | 767.4450       | 384.2261         | I    | 1500.8662        | 750.9367         | 1483.8396 | 742.4235         | 1482.8556        | 741.9314         | 13 |
| 8  | 842.4770         | 421.7422        | 825.4505  | 413.2289         | 824.4665       | 412.7369         | G    | <b>1387.7821</b> | 694.3947         | 1370.7556 | 685.8814         | <b>1369.7716</b> | 685.3894         | 12 |
| 9  | <b>979.5359</b>  | <b>490.2716</b> | 962.5094  | 481.7583         | 961.5254       | 481.2663         | H    | 1330.7607        | 665.8840         | 1313.7341 | 657.3707         | 1312.7501        | 656.8787         | 11 |
| 10 | 1080.5836        | <b>540.7955</b> | 1063.5571 | <b>532.2822</b>  | 1062.5731      | <b>531.7902</b>  | T    | <b>1193.7018</b> | 597.3545         | 1176.6752 | 588.8412         | 1175.6912        | <b>588.3492</b>  | 10 |
| 11 | <b>1193.6677</b> | 597.3375        | 1176.6411 | 588.8242         | 1175.6571      | <b>588.3322</b>  | I    | <b>1092.6541</b> | 546.8307         | 1075.6275 | 538.3174         | 1074.6435        | 537.8254         | 9  |
| 12 | 1324.7082        | 662.8577        | 1307.6816 | 654.3444         | 1306.6976      | 653.8524         | M    | <b>979.5700</b>  | <b>490.2886</b>  | 962.5435  | 481.7754         | 961.5595         | 481.2834         | 8  |
| 13 | 1438.7511        | <b>719.8792</b> | 1421.7245 | 711.3659         | 1420.7405      | 710.8739         | N    | <b>848.5295</b>  | 424.7684         | 831.5030  | 416.2551         | 830.5190         | 415.7631         | 7  |
| 14 | 1551.8352        | 776.4212        | 1534.8086 | 767.9079         | 1533.8246      | 767.4159         | L    | <b>734.4866</b>  | 367.7469         | 717.4601  | 359.2337         | 716.4760         | 358.7417         | 6  |
| 15 | 1664.9192        | 832.9632        | 1647.8927 | 824.4500         | 1646.9087      | 823.9580         | L    | <b>621.4025</b>  | 311.2049         | 604.3760  | 302.6916         | 603.3920         | 302.1996         | 5  |
| 16 | 1763.9876        | 882.4975        | 1746.9611 | 873.9842         | 1745.9771      | 873.4922         | V    | 508.3185         | 254.6629         | 491.2919  | 246.1496         | <b>490.3079</b>  | 245.6576         | 4  |
| 17 | 1879.0146        | 940.0109        | 1861.9880 | 931.4976         | 1861.0040      | 931.0056         | D    | <b>409.2501</b>  | 205.1287         | 392.2235  | 196.6154         | 391.2395         | 196.1234         | 3  |
| 18 | 1992.0986        | 996.5530        | 1975.0721 | 988.0397         | 1974.0881      | 987.5477         | L    | <b>294.2231</b>  | 147.6152         | 277.1966  | 139.1019         |                  |                  | 2  |
| 19 |                  |                 |           |                  |                |                  | R    | <b>181.1391</b>  | 91.0732          | 164.1125  | 82.5599          |                  |                  | 1  |

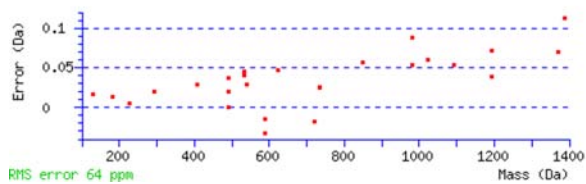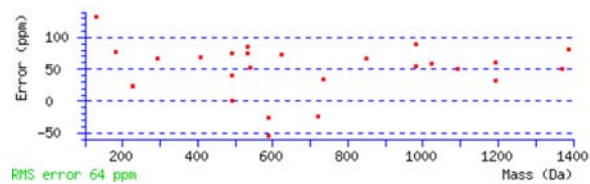



MS/MS Fragmentation of **KSEIEYYAMLAK**

Found in [gi|6677783|ref|NP\\_033109.1](#), ribosomal protein L30 [Mus musculus]

Match to Query 470: 1444.820648 from(723.417600,2+)

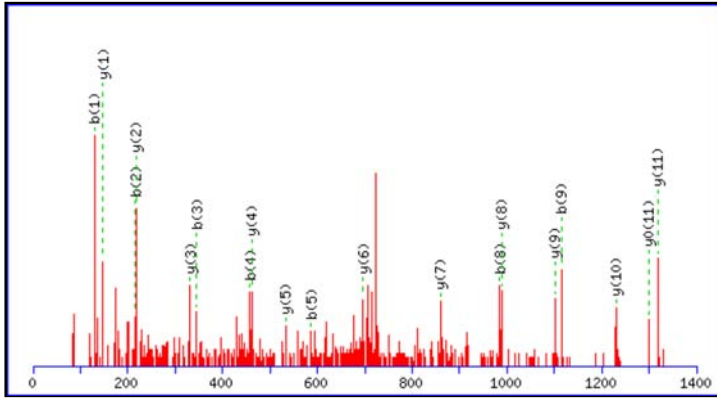

Monoisotopic mass of neutral peptide  $M_r(\text{calc})$ : 1444.7271

Ions Score: 74 Expect: 6.4e-005

Matches (**Bold Red**): 20/116 fragment ions using 32 most intense peaks

| #  | b                | b <sup>++</sup> | b*        | b <sup>*++</sup> | b <sup>0</sup> | b <sup>0++</sup> | Seq. | y                | y <sup>++</sup> | y*        | y <sup>*++</sup> | y <sup>0</sup>   | y <sup>0++</sup> | #  |
|----|------------------|-----------------|-----------|------------------|----------------|------------------|------|------------------|-----------------|-----------|------------------|------------------|------------------|----|
| 1  | <b>129.1022</b>  | 65.0548         | 112.0757  | 56.5415          |                |                  | K    |                  |                 |           |                  |                  |                  | 12 |
| 2  | <b>216.1343</b>  | 108.5708        | 199.1077  | 100.0575         | 198.1237       | 99.5655          | S    | <b>1317.6395</b> | 659.3234        | 1300.6129 | 650.8101         | <b>1299.6289</b> | 650.3181         | 11 |
| 3  | <b>345.1769</b>  | 173.0921        | 328.1503  | 164.5788         | 327.1663       | 164.0868         | E    | <b>1230.6075</b> | 615.8074        | 1213.5809 | 607.2941         | 1212.5969        | 606.8021         | 10 |
| 4  | <b>458.2609</b>  | 229.6341        | 441.2344  | 221.1208         | 440.2504       | 220.6288         | I    | <b>1101.5649</b> | 551.2861        | 1084.5383 | 542.7728         | 1083.5543        | 542.2808         | 9  |
| 5  | <b>587.3035</b>  | 294.1554        | 570.2770  | 285.6421         | 569.2929       | 285.1501         | E    | <b>988.4808</b>  | 494.7440        | 971.4543  | 486.2308         | 970.4702         | 485.7388         | 8  |
| 6  | 750.3668         | 375.6871        | 733.3403  | 367.1738         | 732.3563       | 366.6818         | Y    | <b>859.4382</b>  | 430.2227        | 842.4117  | 421.7095         |                  |                  | 7  |
| 7  | 913.4302         | 457.2187        | 896.4036  | 448.7054         | 895.4196       | 448.2134         | Y    | <b>696.3749</b>  | 348.6911        | 679.3483  | 340.1778         |                  |                  | 6  |
| 8  | <b>984.4673</b>  | 492.7373        | 967.4407  | 484.2240         | 966.4567       | 483.7320         | A    | <b>533.3116</b>  | 267.1594        | 516.2850  | 258.6461         |                  |                  | 5  |
| 9  | <b>1115.5078</b> | 558.2575        | 1098.4812 | 549.7442         | 1097.4972      | 549.2522         | M    | <b>462.2745</b>  | 231.6409        | 445.2479  | 223.1276         |                  |                  | 4  |
| 10 | 1228.5918        | 614.7995        | 1211.5653 | 606.2863         | 1210.5813      | 605.7943         | L    | <b>331.2340</b>  | 166.1206        | 314.2074  | 157.6073         |                  |                  | 3  |
| 11 | <b>1299.6289</b> | 650.3181        | 1282.6024 | 641.8048         | 1281.6184      | 641.3128         | A    | <b>218.1499</b>  | 109.5786        | 201.1234  | 101.0653         |                  |                  | 2  |
| 12 |                  |                 |           |                  |                |                  | K    | <b>147.1128</b>  | 74.0600         | 130.0863  | 65.5468          |                  |                  | 1  |

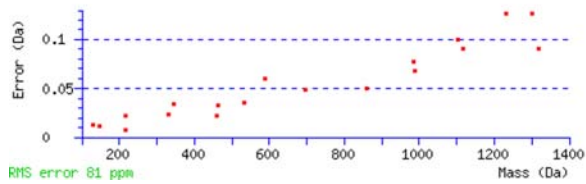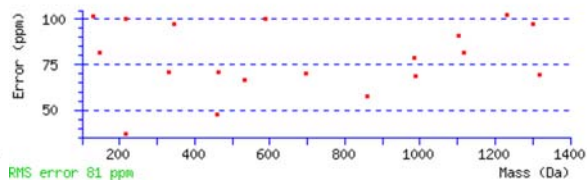

## Peptide View

MS/MS Fragmentation of **LGANSLLDLVVFGFR**

Found in [gi|54607098|ref|NP\\_075770.1](#), succinate dehydrogenase Fp subunit [Mus musculus]

Match to Query 459: 1482.862048 from(742.438300,2+)

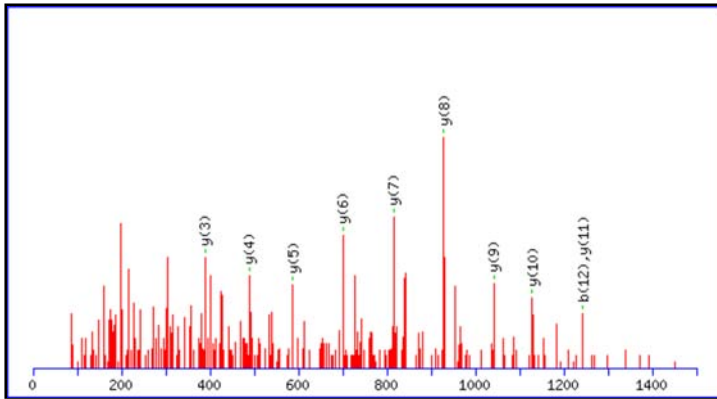

Monoisotopic mass of neutral peptide  $M_r(\text{calc})$ : 1482.8686

Variable modifications:

R14 : Arginine-13C615N4 (R-full)

Ions Score: 69 Expect: 0.00024

Matches (**Bold Red**): 10/130 fragment ions using 18 most intense peaks

| #  | b                | b <sup>++</sup> | b*        | b* <sup>++</sup> | b <sup>0</sup> | b <sup>0++</sup> | Seq. | y                | y <sup>++</sup> | y*        | y* <sup>++</sup> | y <sup>0</sup> | y <sup>0++</sup> | #  |
|----|------------------|-----------------|-----------|------------------|----------------|------------------|------|------------------|-----------------|-----------|------------------|----------------|------------------|----|
| 1  | 114.0913         | 57.5493         |           |                  |                |                  | L    |                  |                 |           |                  |                |                  | 14 |
| 2  | 171.1128         | 86.0600         |           |                  |                |                  | G    | 1370.7918        | 685.8996        | 1353.7653 | 677.3863         | 1352.7813      | 676.8943         | 13 |
| 3  | 242.1499         | 121.5786        |           |                  |                |                  | A    | 1313.7704        | 657.3888        | 1296.7438 | 648.8756         | 1295.7598      | 648.3835         | 12 |
| 4  | 356.1928         | 178.6001        | 339.1663  | 170.0868         |                |                  | N    | <b>1242.7333</b> | 621.8703        | 1225.7067 | 613.3570         | 1224.7227      | 612.8650         | 11 |
| 5  | 443.2249         | 222.1161        | 426.1983  | 213.6028         | 425.2143       | 213.1108         | S    | <b>1128.6903</b> | 564.8488        | 1111.6638 | 556.3355         | 1110.6798      | 555.8435         | 10 |
| 6  | 556.3089         | 278.6581        | 539.2824  | 270.1448         | 538.2984       | 269.6528         | L    | <b>1041.6583</b> | 521.3328        | 1024.6318 | 512.8195         | 1023.6478      | 512.3275         | 9  |
| 7  | 669.3930         | 335.2001        | 652.3664  | 326.6869         | 651.3824       | 326.1948         | L    | <b>928.5743</b>  | 464.7908        | 911.5477  | 456.2775         | 910.5637       | 455.7855         | 8  |
| 8  | 784.4199         | 392.7136        | 767.3934  | 384.2003         | 766.4094       | 383.7083         | D    | <b>815.4902</b>  | 408.2487        | 798.4636  | 399.7355         | 797.4796       | 399.2435         | 7  |
| 9  | 897.5040         | 449.2556        | 880.4774  | 440.7424         | 879.4934       | 440.2503         | L    | <b>700.4633</b>  | 350.7353        | 683.4367  | 342.2220         |                |                  | 6  |
| 10 | 996.5724         | 498.7898        | 979.5458  | 490.2766         | 978.5618       | 489.7846         | V    | <b>587.3792</b>  | 294.1932        | 570.3526  | 285.6800         |                |                  | 5  |
| 11 | 1095.6408        | 548.3240        | 1078.6143 | 539.8108         | 1077.6302      | 539.3188         | V    | <b>488.3108</b>  | 244.6590        | 471.2842  | 236.1458         |                |                  | 4  |
| 12 | <b>1242.7092</b> | 621.8582        | 1225.6827 | 613.3450         | 1224.6987      | 612.8530         | F    | <b>389.2424</b>  | 195.1248        | 372.2158  | 186.6116         |                |                  | 3  |
| 13 | 1299.7307        | 650.3690        | 1282.7041 | 641.8557         | 1281.7201      | 641.3637         | G    | 242.1740         | 121.5906        | 225.1474  | 113.0773         |                |                  | 2  |
| 14 |                  |                 |           |                  |                |                  | R    | 185.1525         | 93.0799         | 168.1260  | 84.5666          |                |                  | 1  |

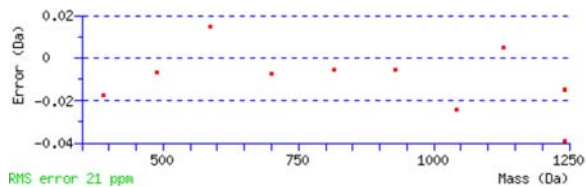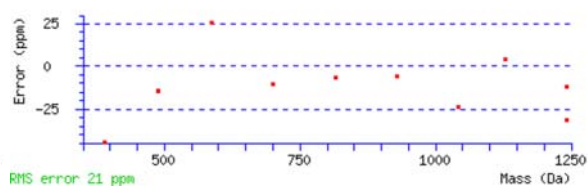

## Peptide View

MS/MS Fragmentation of **LIEVHAVVTVR**

Found in [gi|38348472|ref|NP\\_941015.1](#), adaptor-related protein complex 2, sigma 1 subunit [Mus musculus]

Match to Query 362: 1363.826848 from(682.920700,2+)

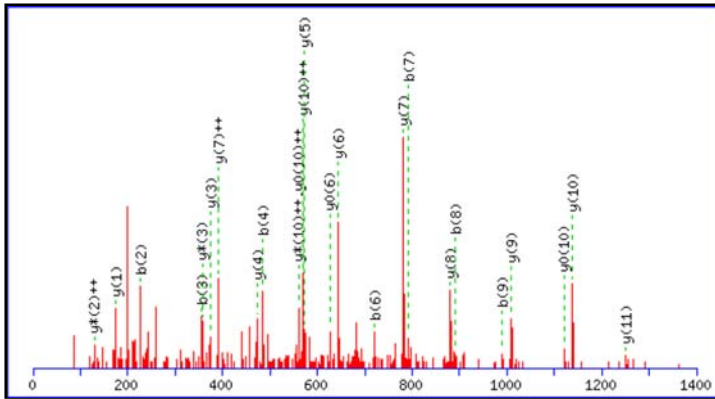

Monoisotopic mass of neutral peptide  $M_r(\text{calc})$ : 1363.7823

Ions Score: 61 Expect: 0.0014

Matches (**Bold Red**): 25/102 fragment ions using 39 most intense peaks

| #  | b               | b <sup>++</sup> | b <sup>0</sup> | b <sup>0++</sup> | Seq. | y                | y <sup>++</sup> | y*              | y* <sup>++</sup> | y <sup>0</sup>   | y <sup>0++</sup> | #  |
|----|-----------------|-----------------|----------------|------------------|------|------------------|-----------------|-----------------|------------------|------------------|------------------|----|
| 1  | 114.0913        | 57.5493         |                |                  | L    |                  |                 |                 |                  |                  |                  | 12 |
| 2  | <b>227.1754</b> | 114.0913        |                |                  | I    | <b>1251.7055</b> | 626.3564        | 1234.6790       | 617.8431         | 1233.6950        | 617.3511         | 11 |
| 3  | <b>356.2180</b> | 178.6126        | 338.2074       | 169.6073         | E    | <b>1138.6215</b> | <b>569.8144</b> | 1121.5949       | <b>561.3011</b>  | <b>1120.6109</b> | <b>560.8091</b>  | 10 |
| 4  | <b>485.2606</b> | 243.1339        | 467.2500       | 234.1286         | E    | <b>1009.5789</b> | 505.2931        | 992.5523        | 496.7798         | 991.5683         | 496.2878         | 9  |
| 5  | 584.3290        | 292.6681        | 566.3184       | 283.6628         | V    | <b>880.5363</b>  | 440.7718        | 863.5097        | 432.2585         | 862.5257         | 431.7665         | 8  |
| 6  | <b>721.3879</b> | 361.1976        | 703.3773       | 352.1923         | H    | <b>781.4679</b>  | <b>391.2376</b> | 764.4413        | 382.7243         | 763.4573         | 382.2323         | 7  |
| 7  | <b>792.4250</b> | 396.7161        | 774.4144       | 387.7109         | A    | <b>644.4090</b>  | 322.7081        | 627.3824        | 314.1948         | <b>626.3984</b>  | 313.7028         | 6  |
| 8  | <b>891.4934</b> | 446.2503        | 873.4829       | 437.2451         | V    | <b>573.3719</b>  | 287.1896        | 556.3453        | 278.6763         | 555.3613         | 278.1843         | 5  |
| 9  | <b>990.5618</b> | 495.7846        | 972.5513       | 486.7793         | V    | <b>474.3035</b>  | 237.6554        | 457.2769        | 229.1421         | 456.2929         | 228.6501         | 4  |
| 10 | 1091.6095       | 546.3084        | 1073.5989      | 537.3031         | T    | <b>375.2350</b>  | 188.1212        | <b>358.2085</b> | 179.6079         | 357.2245         | 179.1159         | 3  |
| 11 | 1190.6779       | 595.8426        | 1172.6674      | 586.8373         | V    | 274.1874         | 137.5973        | 257.1608        | <b>129.0840</b>  |                  |                  | 2  |
| 12 |                 |                 |                |                  | R    | <b>175.1190</b>  | 88.0631         | 158.0924        | 79.5498          |                  |                  | 1  |

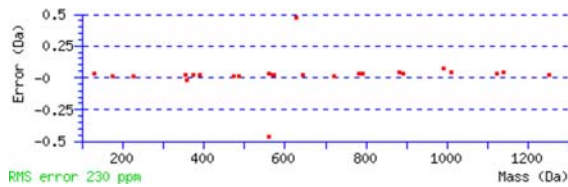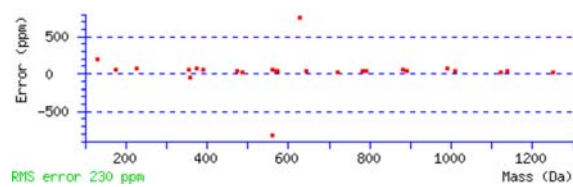

## Peptide View

MS/MS Fragmentation of **LIGQIVSSITASLR**

Found in [gi|6755901|ref|NP\\_035783.1](#), tubulin, alpha 1 [Mus musculus]

Match to Query 297: 1456.936648 from(729.475600,2+)

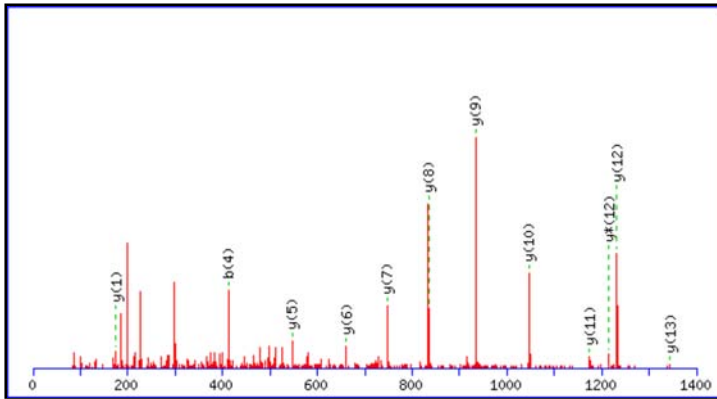

Monoisotopic mass of neutral peptide  $M_r(\text{calc})$ : 1456.8613

Ions Score: 93 Expect: 1.1e-006

Matches (**Bold Red**): 12/134 fragment ions using 20 most intense peaks

| #  | b               | b <sup>++</sup> | b*        | b* <sup>++</sup> | b <sup>0</sup> | b <sup>0++</sup> | Seq. | y                | y <sup>++</sup> | y*               | y* <sup>++</sup> | y <sup>0</sup> | y <sup>0++</sup> | #  |
|----|-----------------|-----------------|-----------|------------------|----------------|------------------|------|------------------|-----------------|------------------|------------------|----------------|------------------|----|
| 1  | 114.0913        | 57.5493         |           |                  |                |                  | L    |                  |                 |                  |                  |                |                  | 14 |
| 2  | 227.1754        | 114.0913        |           |                  |                |                  | I    | <b>1344.7845</b> | 672.8959        | 1327.7580        | 664.3826         | 1326.7740      | 663.8906         | 13 |
| 3  | 284.1969        | 142.6021        |           |                  |                |                  | G    | <b>1231.7005</b> | 616.3539        | <b>1214.6739</b> | 607.8406         | 1213.6899      | 607.3486         | 12 |
| 4  | <b>412.2554</b> | 206.6314        | 395.2289  | 198.1181         |                |                  | Q    | <b>1174.6790</b> | 587.8431        | 1157.6525        | 579.3299         | 1156.6684      | 578.8379         | 11 |
| 5  | 525.3395        | 263.1734        | 508.3129  | 254.6601         |                |                  | I    | <b>1046.6204</b> | 523.8138        | 1029.5939        | 515.3006         | 1028.6099      | 514.8086         | 10 |
| 6  | 624.4079        | 312.7076        | 607.3814  | 304.1943         |                |                  | V    | <b>933.5364</b>  | 467.2718        | 916.5098         | 458.7585         | 915.5258       | 458.2665         | 9  |
| 7  | 711.4399        | 356.2236        | 694.4134  | 347.7103         | 693.4294       | 347.2183         | S    | <b>834.4680</b>  | 417.7376        | 817.4414         | 409.2243         | 816.4574       | 408.7323         | 8  |
| 8  | 798.4720        | 399.7396        | 781.4454  | 391.2263         | 780.4614       | 390.7343         | S    | <b>747.4359</b>  | 374.2216        | 730.4094         | 365.7083         | 729.4254       | 365.2163         | 7  |
| 9  | 911.5560        | 456.2817        | 894.5295  | 447.7684         | 893.5455       | 447.2764         | I    | <b>660.4039</b>  | 330.7056        | 643.3773         | 322.1923         | 642.3933       | 321.7003         | 6  |
| 10 | 1012.6037       | 506.8055        | 995.5772  | 498.2922         | 994.5931       | 497.8002         | T    | <b>547.3198</b>  | 274.1636        | 530.2933         | 265.6503         | 529.3093       | 265.1583         | 5  |
| 11 | 1083.6408       | 542.3240        | 1066.6143 | 533.8108         | 1065.6303      | 533.3188         | A    | 446.2722         | 223.6397        | 429.2456         | 215.1264         | 428.2616       | 214.6344         | 4  |
| 12 | 1170.6728       | 585.8401        | 1153.6463 | 577.3268         | 1152.6623      | 576.8348         | S    | 375.2350         | 188.1212        | 358.2085         | 179.6079         | 357.2245       | 179.1159         | 3  |
| 13 | 1283.7569       | 642.3821        | 1266.7304 | 633.8688         | 1265.7463      | 633.3768         | L    | 288.2030         | 144.6051        | 271.1765         | 136.0919         |                |                  | 2  |
| 14 |                 |                 |           |                  |                |                  | R    | <b>175.1190</b>  | 88.0631         | 158.0924         | 79.5498          |                |                  | 1  |

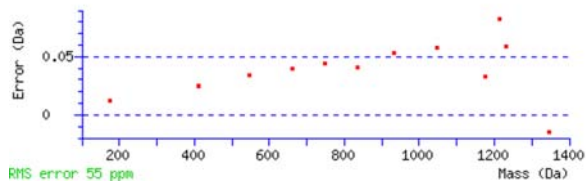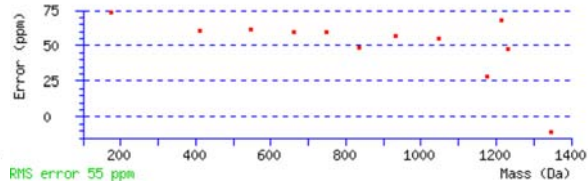

## Peptide View

MS/MS Fragmentation of **LLQDSVDFSLADAINTEFK**

Found in [gi|31982755|ref|NP\\_035831.2](#), vimentin [Mus musculus]

Match to Query 760: 2125.234248 from(1063.624400,2+)

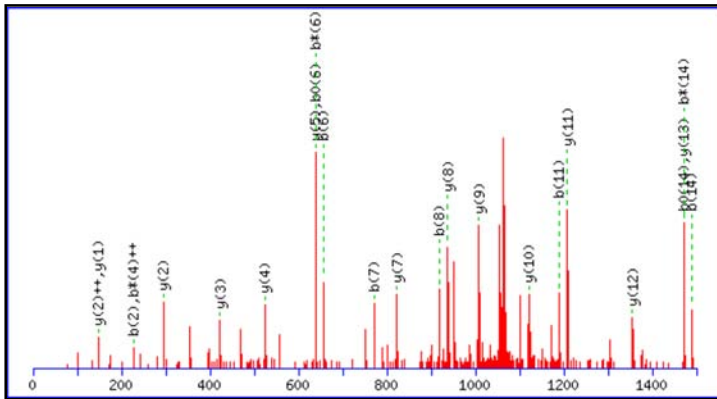

Monoisotopic mass of neutral peptide  $M_r(\text{calc})$ : 2125.0579

Ions Score: 105 Expect:  $1.5e-007$

Matches (**Bold Red**): 24/202 fragment ions using 27 most intense peaks

| #  | b                | b <sup>++</sup> | b*               | b* <sup>++</sup> | b <sup>0</sup>   | b <sup>0++</sup> | Seq. | y                | y <sup>++</sup> | y*        | y* <sup>++</sup> | y <sup>0</sup> | y <sup>0++</sup> | #  |
|----|------------------|-----------------|------------------|------------------|------------------|------------------|------|------------------|-----------------|-----------|------------------|----------------|------------------|----|
| 1  | 114.0913         | 57.5493         |                  |                  |                  |                  | L    |                  |                 |           |                  |                |                  | 19 |
| 2  | <b>227.1754</b>  | 114.0913        |                  |                  |                  |                  | L    | 2012.9811        | 1006.9942       | 1995.9545 | 998.4809         | 1994.9705      | 997.9889         | 18 |
| 3  | 355.2340         | 178.1206        | 338.2074         | 169.6074         |                  |                  | Q    | 1899.8970        | 950.4522        | 1882.8705 | 941.9389         | 1881.8865      | 941.4469         | 17 |
| 4  | 470.2609         | 235.6341        | 453.2344         | <b>227.1208</b>  | 452.2504         | 226.6288         | D    | 1771.8385        | 886.4229        | 1754.8119 | 877.9096         | 1753.8279      | 877.4176         | 16 |
| 5  | 557.2929         | 279.1501        | 540.2664         | 270.6368         | 539.2824         | 270.1448         | S    | 1656.8115        | 828.9094        | 1639.7850 | 820.3961         | 1638.8009      | 819.9041         | 15 |
| 6  | <b>656.3614</b>  | 328.6843        | <b>639.3348</b>  | 320.1710         | <b>638.3508</b>  | 319.6790         | V    | 1569.7795        | 785.3934        | 1552.7529 | 776.8801         | 1551.7689      | 776.3881         | 14 |
| 7  | <b>771.3883</b>  | 386.1978        | 754.3617         | 377.6845         | 753.3777         | 377.1925         | D    | <b>1470.7111</b> | 735.8592        | 1453.6845 | 727.3459         | 1452.7005      | 726.8539         | 13 |
| 8  | <b>918.4567</b>  | 459.7320        | 901.4302         | 451.2187         | 900.4461         | 450.7267         | F    | <b>1355.6841</b> | 678.3457        | 1338.6576 | 669.8324         | 1337.6736      | 669.3404         | 12 |
| 9  | 1005.4887        | 503.2480        | 988.4622         | 494.7347         | 987.4782         | 494.2427         | S    | <b>1208.6157</b> | 604.8115        | 1191.5892 | 596.2982         | 1190.6052      | 595.8062         | 11 |
| 10 | 1118.5728        | 559.7900        | 1101.5462        | 551.2768         | 1100.5622        | 550.7848         | L    | <b>1121.5837</b> | 561.2955        | 1104.5571 | 552.7822         | 1103.5731      | 552.2902         | 10 |
| 11 | <b>1189.6099</b> | 595.3086        | 1172.5834        | 586.7953         | 1171.5993        | 586.3033         | A    | <b>1008.4996</b> | 504.7535        | 991.4731  | 496.2402         | 990.4891       | 495.7482         | 9  |
| 12 | 1304.6368        | 652.8221        | 1287.6103        | 644.3088         | 1286.6263        | 643.8168         | D    | <b>937.4625</b>  | 469.2349        | 920.4360  | 460.7216         | 919.4520       | 460.2296         | 8  |
| 13 | 1375.6740        | 688.3406        | 1358.6474        | 679.8273         | 1357.6634        | 679.3353         | A    | <b>822.4356</b>  | 411.7214        | 805.4090  | 403.2082         | 804.4250       | 402.7161         | 7  |
| 14 | <b>1488.7580</b> | 744.8826        | <b>1471.7315</b> | 736.3694         | <b>1470.7475</b> | 735.8774         | I    | 751.3985         | 376.2029        | 734.3719  | 367.6896         | 733.3879       | 367.1976         | 6  |
| 15 | 1602.8009        | 801.9041        | 1585.7744        | 793.3908         | 1584.7904        | 792.8988         | N    | <b>638.3144</b>  | 319.6608        | 621.2879  | 311.1476         | 620.3038       | 310.6556         | 5  |
| 16 | 1703.8486        | 852.4280        | 1686.8221        | 843.9147         | 1685.8381        | 843.4227         | T    | <b>524.2715</b>  | 262.6394        | 507.2449  | 254.1261         | 506.2609       | 253.6341         | 4  |
| 17 | 1832.8912        | 916.9492        | 1815.8647        | 908.4360         | 1814.8807        | 907.9440         | E    | <b>423.2238</b>  | 212.1155        | 406.1973  | 203.6023         | 405.2132       | 203.1103         | 3  |
| 18 | 1979.9596        | 990.4835        | 1962.9331        | 981.9702         | 1961.9491        | 981.4782         | F    | <b>294.1812</b>  | <b>147.5942</b> | 277.1547  | 139.0810         |                |                  | 2  |
| 19 |                  |                 |                  |                  |                  |                  | K    | <b>147.1128</b>  | 74.0600         | 130.0863  | 65.5468          |                |                  | 1  |

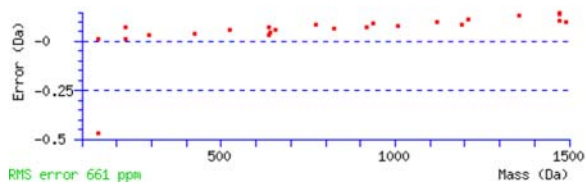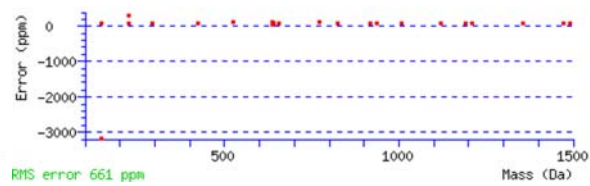

## Peptide View

MS/MS Fragmentation of **LMLLEVISGER**

Found in [gi|11230802|ref|NP\\_068695.1](#), actinin alpha 4 [Mus musculus]

Match to Query 368: 1371.844448 from(686.929500,2+)

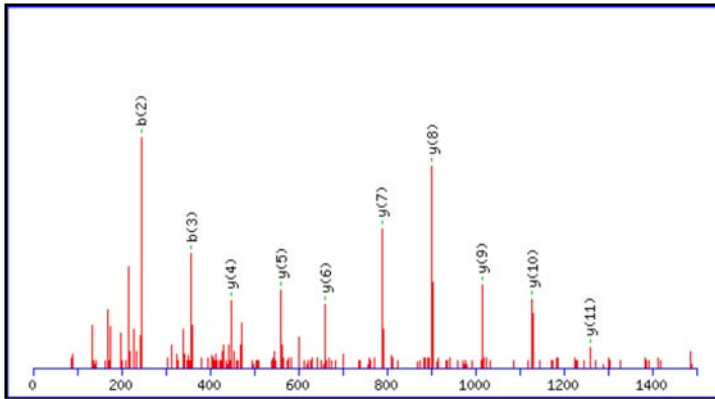

Monoisotopic mass of neutral peptide  $M_r(\text{calc})$ : 1371.7795

Ions Score: 69 Expect: 0.0002

Matches (**Bold Red**): 10/98 fragment ions using 20 most intense peaks

| #  | b               | b <sup>++</sup> | b <sup>0</sup> | b <sup>0++</sup> | Seq.     | y                | y <sup>++</sup> | y*        | y <sup>*++</sup> | y <sup>0</sup> | y <sup>0++</sup> | #  |
|----|-----------------|-----------------|----------------|------------------|----------|------------------|-----------------|-----------|------------------|----------------|------------------|----|
| 1  | 114.0913        | 57.5493         |                |                  | L        |                  |                 |           |                  |                |                  | 12 |
| 2  | <b>245.1318</b> | 123.0695        |                |                  | <b>M</b> | <b>1259.7028</b> | 630.3550        | 1242.6762 | 621.8417         | 1241.6922      | 621.3497         | 11 |
| 3  | <b>358.2159</b> | 179.6116        |                |                  | L        | <b>1128.6623</b> | 564.8348        | 1111.6357 | 556.3215         | 1110.6517      | 555.8295         | 10 |
| 4  | 471.2999        | 236.1536        |                |                  | L        | <b>1015.5782</b> | 508.2927        | 998.5517  | 499.7795         | 997.5676       | 499.2875         | 9  |
| 5  | 584.3840        | 292.6956        |                |                  | L        | <b>902.4942</b>  | 451.7507        | 885.4676  | 443.2374         | 884.4836       | 442.7454         | 8  |
| 6  | 713.4266        | 357.2169        | 695.4160       | 348.2116         | E        | <b>789.4101</b>  | 395.2087        | 772.3835  | 386.6954         | 771.3995       | 386.2034         | 7  |
| 7  | 812.4950        | 406.7511        | 794.4844       | 397.7459         | V        | <b>660.3675</b>  | 330.6874        | 643.3410  | 322.1741         | 642.3569       | 321.6821         | 6  |
| 8  | 925.5791        | 463.2932        | 907.5685       | 454.2879         | I        | <b>561.2991</b>  | 281.1532        | 544.2725  | 272.6399         | 543.2885       | 272.1479         | 5  |
| 9  | 1012.6111       | 506.8092        | 994.6005       | 497.8039         | S        | <b>448.2150</b>  | 224.6112        | 431.1885  | 216.0979         | 430.2045       | 215.6059         | 4  |
| 10 | 1069.6325       | 535.3199        | 1051.6220      | 526.3146         | G        | 361.1830         | 181.0951        | 344.1565  | 172.5819         | 343.1724       | 172.0899         | 3  |
| 11 | 1198.6751       | 599.8412        | 1180.6646      | 590.8359         | E        | 304.1615         | 152.5844        | 287.1350  | 144.0711         | 286.1510       | 143.5791         | 2  |
| 12 |                 |                 |                |                  | R        | 175.1190         | 88.0631         | 158.0924  | 79.5498          |                |                  | 1  |

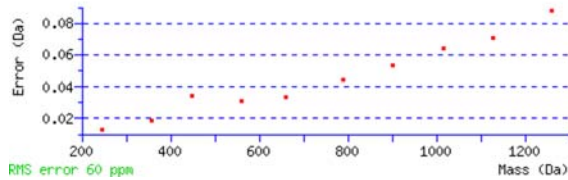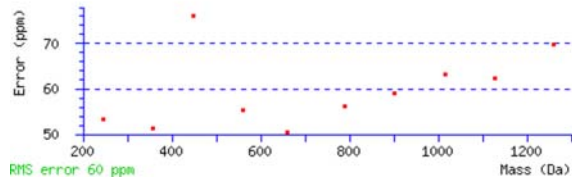



## Peptide View

MS/MS Fragmentation of **LNYAQWYPIVVFLNPDSK**

Found in [gi|6678355|ref|NP\\_033412.1](#), tight junction protein 1 [Mus musculus]

Match to Query 532: 2166.216248 from(1084.115400,2+)

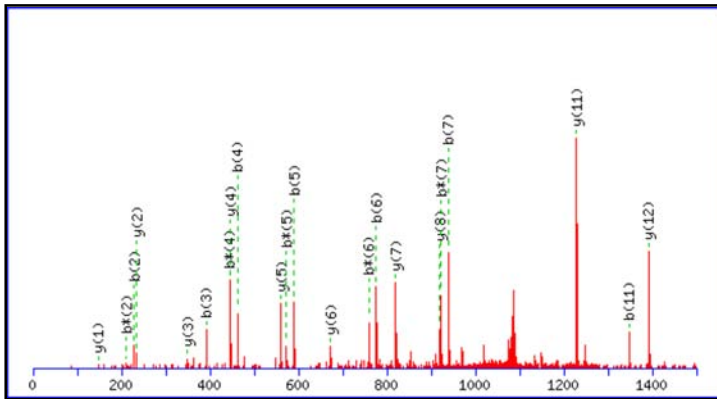

Monoisotopic mass of neutral peptide  $M_r(\text{calc})$ : 2166.1149

Ions Score: 54 Expect: 0.018

Matches (**Bold Red**): 22/170 fragment ions using 42 most intense peaks

| #  | b                | b <sup>++</sup> | b*              | b* <sup>++</sup> | b <sup>0</sup> | b <sup>0++</sup> | Seq. | y                | y <sup>++</sup> | y*        | y* <sup>++</sup> | y <sup>0</sup> | y <sup>0++</sup> | #  |
|----|------------------|-----------------|-----------------|------------------|----------------|------------------|------|------------------|-----------------|-----------|------------------|----------------|------------------|----|
| 1  | 114.0913         | 57.5493         |                 |                  |                |                  | L    |                  |                 |           |                  |                |                  | 18 |
| 2  | <b>228.1343</b>  | 114.5708        | <b>211.1077</b> | 106.0575         |                |                  | N    | 2054.0382        | 1027.5227       | 2037.0116 | 1019.0094        | 2036.0276      | 1018.5174        | 17 |
| 3  | <b>391.1976</b>  | 196.1024        | 374.1710        | 187.5892         |                |                  | Y    | 1939.9952        | 970.5013        | 1922.9687 | 961.9880         | 1921.9847      | 961.4960         | 16 |
| 4  | <b>462.2347</b>  | 231.6210        | <b>445.2082</b> | 223.1077         |                |                  | A    | 1776.9319        | 888.9696        | 1759.9054 | 880.4563         | 1758.9213      | 879.9643         | 15 |
| 5  | <b>590.2933</b>  | 295.6503        | <b>573.2667</b> | 287.1370         |                |                  | Q    | 1705.8948        | 853.4510        | 1688.8682 | 844.9378         | 1687.8842      | 844.4458         | 14 |
| 6  | <b>776.3726</b>  | 388.6899        | <b>759.3460</b> | 380.1767         |                |                  | W    | 1577.8362        | 789.4217        | 1560.8097 | 780.9085         | 1559.8256      | 780.4165         | 13 |
| 7  | <b>939.4359</b>  | 470.2216        | <b>922.4094</b> | 461.7083         |                |                  | Y    | <b>1391.7569</b> | 696.3821        | 1374.7304 | 687.8688         | 1373.7463      | 687.3768         | 12 |
| 8  | 1036.4887        | 518.7480        | 1019.4621       | 510.2347         |                |                  | P    | <b>1228.6936</b> | 614.8504        | 1211.6670 | 606.3371         | 1210.6830      | 605.8451         | 11 |
| 9  | 1149.5727        | 575.2900        | 1132.5462       | 566.7767         |                |                  | I    | 1131.6408        | 566.3240        | 1114.6143 | 557.8108         | 1113.6302      | 557.3188         | 10 |
| 10 | 1248.6412        | 624.8242        | 1231.6146       | 616.3109         |                |                  | V    | 1018.5568        | 509.7820        | 1001.5302 | 501.2687         | 1000.5462      | 500.7767         | 9  |
| 11 | <b>1347.7096</b> | 674.3584        | 1330.6830       | 665.8451         |                |                  | V    | <b>919.4883</b>  | 460.2478        | 902.4618  | 451.7345         | 901.4778       | 451.2425         | 8  |
| 12 | 1494.7780        | 747.8926        | 1477.7514       | 739.3794         |                |                  | F    | <b>820.4199</b>  | 410.7136        | 803.3934  | 402.2003         | 802.4094       | 401.7083         | 7  |
| 13 | 1607.8620        | 804.4347        | 1590.8355       | 795.9214         |                |                  | L    | <b>673.3515</b>  | 337.1794        | 656.3250  | 328.6661         | 655.3410       | 328.1741         | 6  |
| 14 | 1721.9050        | 861.4561        | 1704.8784       | 852.9428         |                |                  | N    | <b>560.2675</b>  | 280.6374        | 543.2409  | 272.1241         | 542.2569       | 271.6321         | 5  |
| 15 | 1818.9577        | 909.9825        | 1801.9312       | 901.4692         |                |                  | P    | <b>446.2245</b>  | 223.6159        | 429.1980  | 215.1026         | 428.2140       | 214.6106         | 4  |
| 16 | 1933.9847        | 967.4960        | 1916.9581       | 958.9827         | 1915.9741      | 958.4907         | D    | <b>349.1718</b>  | 175.0895        | 332.1452  | 166.5762         | 331.1612       | 166.0842         | 3  |
| 17 | 2021.0167        | 1011.0120       | 2003.9901       | 1002.4987        | 2003.0061      | 1002.0067        | S    | <b>234.1448</b>  | 117.5761        | 217.1183  | 109.0628         | 216.1343       | 108.5708         | 2  |
| 18 |                  |                 |                 |                  |                |                  | K    | <b>147.1128</b>  | 74.0600         | 130.0863  | 65.5468          |                |                  | 1  |

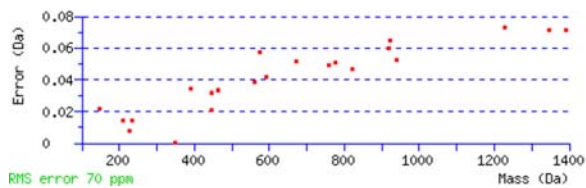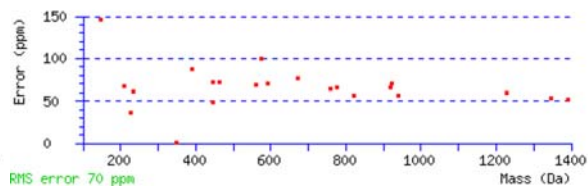

## Peptide View

MS/MS Fragmentation of **LPAAGVGDMVMATVK**

Found in [gi|12584986|ref|NP\\_075029.1](#), ribosomal protein L23 [Mus musculus]

Match to Query 298: 1458.823048 from(730.418800,2+)

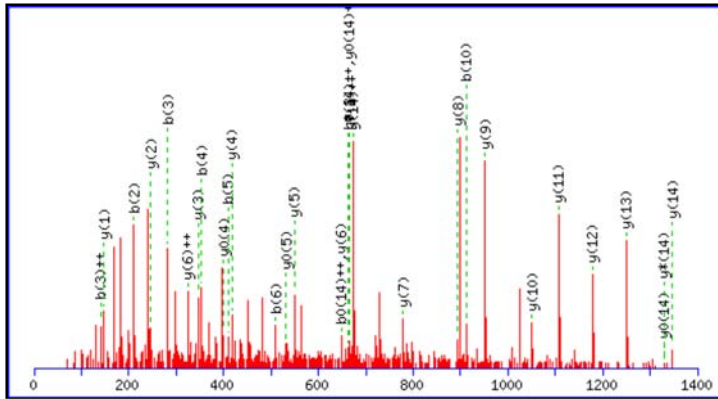

**Monoisotopic mass of neutral peptide Mr(calc): 1458.7574**

**Ions Score: 70 Expect: 0.00019**

**Matches (Bold Red): 31/122 fragment ions using 93 most intense peaks**

| #  | b               | b <sup>++</sup> | b <sup>0</sup>  | b <sup>0++</sup> | Seq. | y                | y <sup>++</sup> | y*               | y <sup>*++</sup> | y <sup>0</sup>   | y <sup>0++</sup> | #  |
|----|-----------------|-----------------|-----------------|------------------|------|------------------|-----------------|------------------|------------------|------------------|------------------|----|
| 1  | 114.0913        | 57.5493         |                 |                  | L    |                  |                 |                  |                  |                  |                  | 15 |
| 2  | <b>211.1441</b> | 106.0757        |                 |                  | P    | <b>1346.6806</b> | <b>673.8439</b> | <b>1329.6541</b> | <b>665.3307</b>  | <b>1328.6701</b> | <b>664.8387</b>  | 14 |
| 3  | <b>282.1812</b> | <b>141.5942</b> |                 |                  | A    | <b>1249.6279</b> | 625.3176        | 1232.6013        | 616.8043         | 1231.6173        | 616.3123         | 13 |
| 4  | <b>353.2183</b> | 177.1128        |                 |                  | A    | <b>1178.5908</b> | 589.7990        | 1161.5642        | 581.2857         | 1160.5802        | 580.7937         | 12 |
| 5  | <b>410.2398</b> | 205.6235        |                 |                  | G    | <b>1107.5536</b> | 554.2805        | 1090.5271        | 545.7672         | 1089.5431        | 545.2752         | 11 |
| 6  | <b>509.3082</b> | 255.1577        |                 |                  | V    | <b>1050.5322</b> | 525.7697        | 1033.5056        | 517.2565         | 1032.5216        | 516.7644         | 10 |
| 7  | 566.3296        | 283.6685        |                 |                  | G    | <b>951.4638</b>  | 476.2355        | 934.4372         | 467.7222         | 933.4532         | 467.2302         | 9  |
| 8  | 681.3566        | 341.1819        | <b>663.3460</b> | 332.1766         | D    | <b>894.4423</b>  | 447.7248        | 877.4158         | 439.2115         | 876.4317         | 438.7195         | 8  |
| 9  | 812.3971        | 406.7022        | 794.3865        | 397.6969         | M    | <b>779.4154</b>  | 390.2113        | 762.3888         | 381.6980         | 761.4048         | 381.2060         | 7  |
| 10 | <b>911.4655</b> | 456.2364        | 893.4549        | 447.2311         | V    | <b>648.3749</b>  | <b>324.6911</b> | 631.3483         | 316.1778         | 630.3643         | 315.6858         | 6  |
| 11 | 1042.5060       | 521.7566        | 1024.4954       | 512.7513         | M    | <b>549.3065</b>  | 275.1569        | 532.2799         | 266.6436         | <b>531.2959</b>  | 266.1516         | 5  |
| 12 | 1113.5431       | 557.2752        | 1095.5325       | 548.2699         | A    | <b>418.2660</b>  | 209.6366        | 401.2395         | 201.1234         | <b>400.2554</b>  | 200.6314         | 4  |
| 13 | 1214.5907       | 607.7990        | 1196.5802       | 598.7937         | T    | <b>347.2289</b>  | 174.1181        | 330.2023         | 165.6048         | 329.2183         | 165.1128         | 3  |
| 14 | 1313.6592       | 657.3332        | 1295.6486       | <b>648.3279</b>  | V    | <b>246.1812</b>  | 123.5942        | 229.1547         | 115.0810         |                  |                  | 2  |
| 15 |                 |                 |                 |                  | K    | <b>147.1128</b>  | 74.0600         | 130.0863         | 65.5468          |                  |                  | 1  |

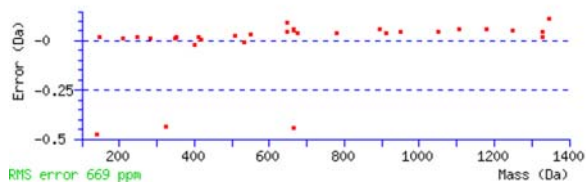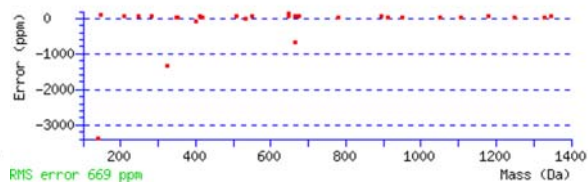

## Peptide View

MS/MS Fragmentation of **LSLQLALTELETLAEK**

Found in [gi|40254212|ref|NP\\_766003.2](#), Rho guanine nucleotide exchange factor (GEF) 10-like [Mus musculus]

Match to Query 594: 1771.020048 from(886.517300,2+)

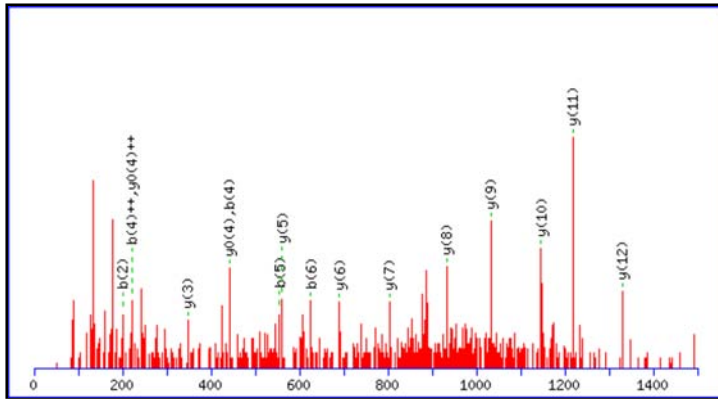

Monoisotopic mass of neutral peptide Mr(calc): 1770.9978

Ions Score: 66 Expect: 0.00081

Matches (Bold Red): 16/170 fragment ions using 27 most intense peaks

| #  | b               | b <sup>++</sup> | b*        | b <sup>*++</sup> | b <sup>0</sup> | b <sup>0++</sup> | Seq. | y                | y <sup>++</sup> | y*        | y <sup>*++</sup> | y <sup>0</sup>  | y <sup>0++</sup> | #  |
|----|-----------------|-----------------|-----------|------------------|----------------|------------------|------|------------------|-----------------|-----------|------------------|-----------------|------------------|----|
| 1  | 114.0913        | 57.5493         |           |                  |                |                  | L    |                  |                 |           |                  |                 |                  | 16 |
| 2  | <b>201.1234</b> | 101.0653        |           |                  | 183.1128       | 92.0600          | S    | 1658.9211        | 829.9642        | 1641.8945 | 821.4509         | 1640.9105       | 820.9589         | 15 |
| 3  | 314.2074        | 157.6074        |           |                  | 296.1969       | 148.6021         | L    | 1571.8890        | 786.4482        | 1554.8625 | 777.9349         | 1553.8785       | 777.4429         | 14 |
| 4  | <b>442.2660</b> | <b>221.6366</b> | 425.2395  | 213.1234         | 424.2554       | 212.6314         | Q    | 1458.8050        | 729.9061        | 1441.7784 | 721.3928         | 1440.7944       | 720.9008         | 13 |
| 5  | <b>555.3501</b> | 278.1787        | 538.3235  | 269.6654         | 537.3395       | 269.1734         | L    | <b>1330.7464</b> | 665.8768        | 1313.7198 | 657.3636         | 1312.7358       | 656.8716         | 12 |
| 6  | <b>626.3872</b> | 313.6972        | 609.3606  | 305.1840         | 608.3766       | 304.6919         | A    | <b>1217.6623</b> | 609.3348        | 1200.6358 | 600.8215         | 1199.6518       | 600.3295         | 11 |
| 7  | 739.4712        | 370.2393        | 722.4447  | 361.7260         | 721.4607       | 361.2340         | L    | <b>1146.6252</b> | 573.8162        | 1129.5987 | 565.3030         | 1128.6147       | 564.8110         | 10 |
| 8  | 840.5189        | 420.7631        | 823.4924  | 412.2498         | 822.5084       | 411.7578         | T    | <b>1033.5412</b> | 517.2742        | 1016.5146 | 508.7609         | 1015.5306       | 508.2689         | 9  |
| 9  | 969.5615        | 485.2844        | 952.5350  | 476.7711         | 951.5509       | 476.2791         | E    | <b>932.4935</b>  | 466.7504        | 915.4669  | 458.2371         | 914.4829        | 457.7451         | 8  |
| 10 | 1082.6456       | 541.8264        | 1065.6190 | 533.3131         | 1064.6350      | 532.8211         | L    | <b>803.4509</b>  | 402.2291        | 786.4243  | 393.7158         | 785.4403        | 393.2238         | 7  |
| 11 | 1211.6882       | 606.3477        | 1194.6616 | 597.8344         | 1193.6776      | 597.3424         | E    | <b>690.3668</b>  | 345.6871        | 673.3403  | 337.1738         | 672.3563        | 336.6818         | 6  |
| 12 | 1312.7358       | 656.8716        | 1295.7093 | 648.3583         | 1294.7253      | 647.8663         | T    | <b>561.3242</b>  | 281.1658        | 544.2977  | 272.6525         | 543.3137        | 272.1605         | 5  |
| 13 | 1425.8199       | 713.4136        | 1408.7933 | 704.9003         | 1407.8093      | 704.4083         | L    | 460.2766         | 230.6419        | 443.2500  | 222.1286         | <b>442.2660</b> | <b>221.6366</b>  | 4  |
| 14 | 1496.8570       | 748.9321        | 1479.8305 | 740.4189         | 1478.8464      | 739.9269         | A    | <b>347.1925</b>  | 174.0999        | 330.1660  | 165.5866         | 329.1819        | 165.0946         | 3  |
| 15 | 1625.8996       | 813.4534        | 1608.8730 | 804.9402         | 1607.8890      | 804.4482         | E    | 276.1554         | 138.5813        | 259.1288  | 130.0681         | 258.1448        | 129.5761         | 2  |
| 16 |                 |                 |           |                  |                |                  | K    | 147.1128         | 74.0600         | 130.0863  | 65.5468          |                 |                  | 1  |

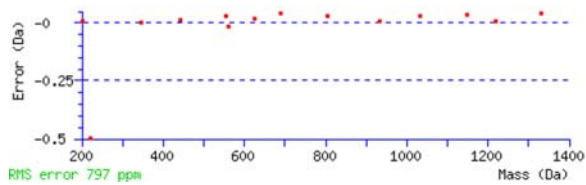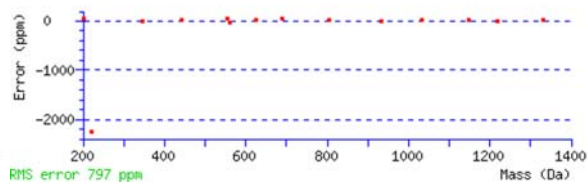

## Peptide View

MS/MS Fragmentation of **LVLSPADMAAVFINLEDLIK**

Found in [gi|6678555|ref|NP\\_033526.1](#), Vav2 oncogene [Mus musculus]

Match to Query 702: 2171.237448 from(1086.626000,2+)

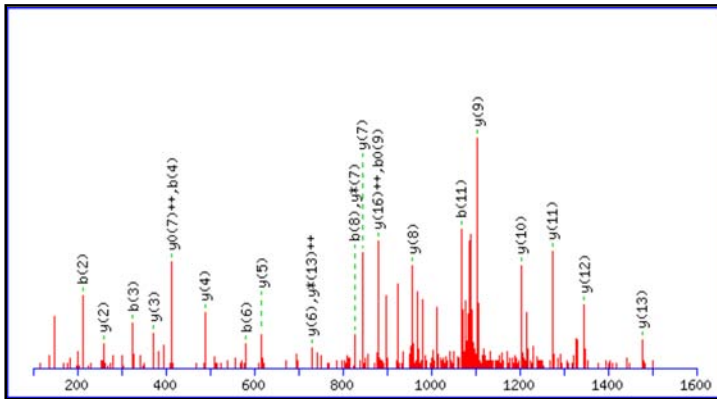

Monoisotopic mass of neutral peptide  $M_r(\text{calc})$ : 2171.1911

Ions Score: 98 Expect: 7.6e-007

Matches (**Bold Red**): 23/190 fragment ions using 25 most intense peaks

| #  | b                | b <sup>++</sup> | b*        | b* <sup>++</sup> | b <sup>0</sup>  | b <sup>0++</sup> | Seq. | y                | y <sup>++</sup> | y*              | y* <sup>++</sup> | y <sup>0</sup> | y <sup>0++</sup> | #  |
|----|------------------|-----------------|-----------|------------------|-----------------|------------------|------|------------------|-----------------|-----------------|------------------|----------------|------------------|----|
| 1  | 114.0913         | 57.5493         |           |                  |                 |                  | L    |                  |                 |                 |                  |                |                  | 20 |
| 2  | <b>213.1597</b>  | 107.0835        |           |                  |                 |                  | V    | 2059.1143        | 1030.0608       | 2042.0878       | 1021.5475        | 2041.1038      | 1021.0555        | 19 |
| 3  | <b>326.2438</b>  | 163.6255        |           |                  |                 |                  | L    | 1960.0459        | 980.5266        | 1943.0194       | 972.0133         | 1942.0354      | 971.5213         | 18 |
| 4  | <b>413.2758</b>  | 207.1416        |           |                  | 395.2653        | 198.1363         | S    | 1846.9619        | 923.9846        | 1829.9353       | 915.4713         | 1828.9513      | 914.9793         | 17 |
| 5  | 510.3286         | 255.6679        |           |                  | 492.3180        | 246.6627         | P    | 1759.9298        | <b>880.4686</b> | 1742.9033       | 871.9553         | 1741.9193      | 871.4633         | 16 |
| 6  | <b>581.3657</b>  | 291.1865        |           |                  | 563.3551        | 282.1812         | A    | 1662.8771        | 831.9422        | 1645.8505       | 823.4289         | 1644.8665      | 822.9369         | 15 |
| 7  | 696.3926         | 348.7000        |           |                  | 678.3821        | 339.6947         | D    | 1591.8400        | 796.4236        | 1574.8134       | 787.9103         | 1573.8294      | 787.4183         | 14 |
| 8  | <b>827.4331</b>  | 414.2202        |           |                  | 809.4226        | 405.2149         | M    | <b>1476.8130</b> | 738.9101        | 1459.7865       | <b>730.3969</b>  | 1458.8025      | 729.9049         | 13 |
| 9  | 898.4702         | 449.7388        |           |                  | <b>880.4597</b> | 440.7335         | A    | <b>1345.7725</b> | 673.3899        | 1328.7460       | 664.8766         | 1327.7620      | 664.3846         | 12 |
| 10 | 969.5073         | 485.2573        |           |                  | 951.4968        | 476.2520         | A    | <b>1274.7354</b> | 637.8714        | 1257.7089       | 629.3581         | 1256.7249      | 628.8661         | 11 |
| 11 | <b>1068.5758</b> | 534.7915        |           |                  | 1050.5652       | 525.7862         | V    | <b>1203.6983</b> | 602.3528        | 1186.6718       | 593.8395         | 1185.6878      | 593.3475         | 10 |
| 12 | 1215.6442        | 608.3257        |           |                  | 1197.6336       | 599.3204         | F    | <b>1104.6299</b> | 552.8186        | 1087.6034       | 544.3053         | 1086.6193      | 543.8133         | 9  |
| 13 | 1328.7282        | 664.8678        |           |                  | 1310.7177       | 655.8625         | I    | <b>957.5615</b>  | 479.2844        | 940.5350        | 470.7711         | 939.5509       | 470.2791         | 8  |
| 14 | 1442.7712        | 721.8892        | 1425.7446 | 713.3759         | 1424.7606       | 712.8839         | N    | <b>844.4774</b>  | 422.7424        | <b>827.4509</b> | 414.2291         | 826.4669       | <b>413.7371</b>  | 7  |
| 15 | 1555.8552        | 778.4312        | 1538.8287 | 769.9180         | 1537.8447       | 769.4260         | L    | <b>730.4345</b>  | 365.7209        | 713.4080        | 357.2076         | 712.4239       | 356.7156         | 6  |
| 16 | 1684.8978        | 842.9525        | 1667.8713 | 834.4393         | 1666.8872       | 833.9473         | E    | <b>617.3505</b>  | 309.1789        | 600.3239        | 300.6656         | 599.3399       | 300.1736         | 5  |
| 17 | 1799.9247        | 900.4660        | 1782.8982 | 891.9527         | 1781.9142       | 891.4607         | D    | <b>488.3079</b>  | 244.6576        | 471.2813        | 236.1443         | 470.2973       | 235.6523         | 4  |
| 18 | 1913.0088        | 957.0080        | 1895.9823 | 948.4948         | 1894.9982       | 948.0028         | L    | <b>373.2809</b>  | 187.1441        | 356.2544        | 178.6308         |                |                  | 3  |
| 19 | 2026.0929        | 1013.5501       | 2009.0663 | 1005.0368        | 2008.0823       | 1004.5448        | I    | <b>260.1969</b>  | 130.6021        | 243.1703        | 122.0888         |                |                  | 2  |
| 20 |                  |                 |           |                  |                 |                  | K    | 147.1128         | 74.0600         | 130.0863        | 65.5468          |                |                  | 1  |

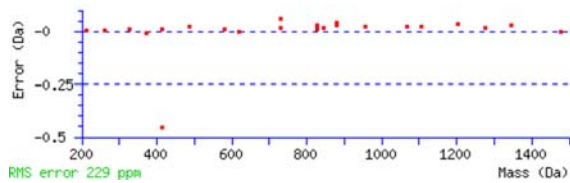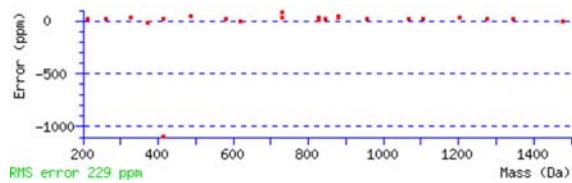

## Peptide View

MS/MS Fragmentation of **LYTLVTVYVPVTTFK**

Found in [gi|94398865|ref|XP\\_996947.1|](#), PREDICTED: similar to ribosomal protein L31 [Mus musculus]

Match to Query 941: 1643.990048 from(823.002300,2+)

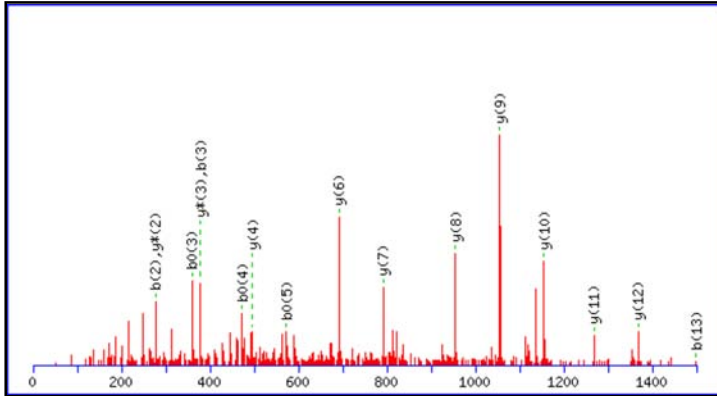

Monoisotopic mass of neutral peptide  $M_r(\text{calc})$ : 1643.9174

Ions Score: 54 Expect: 0.011

Matches (**Bold Red**): 16/122 fragment ions using 36 most intense peaks

| #  | b                | b <sup>++</sup> | b <sup>0</sup>  | b <sup>0++</sup> | Seq. | y                | y <sup>++</sup> | y*              | y* <sup>++</sup> | y <sup>0</sup> | y <sup>0++</sup> | #  |
|----|------------------|-----------------|-----------------|------------------|------|------------------|-----------------|-----------------|------------------|----------------|------------------|----|
| 1  | 114.0913         | 57.5493         |                 |                  | L    |                  |                 |                 |                  |                |                  | 14 |
| 2  | <b>277.1547</b>  | 139.0810        |                 |                  | Y    | 1531.8406        | 766.4240        | 1514.8141       | 757.9107         | 1513.8301      | 757.4187         | 13 |
| 3  | <b>378.2023</b>  | 189.6048        | <b>360.1918</b> | 180.5995         | T    | <b>1368.7773</b> | 684.8923        | 1351.7508       | 676.3790         | 1350.7667      | 675.8870         | 12 |
| 4  | 491.2864         | 246.1468        | <b>473.2758</b> | 237.1416         | L    | <b>1267.7296</b> | 634.3685        | 1250.7031       | 625.8552         | 1249.7191      | 625.3632         | 11 |
| 5  | 590.3548         | 295.6810        | <b>572.3443</b> | 286.6758         | V    | <b>1154.6456</b> | 577.8264        | 1137.6190       | 569.3131         | 1136.6350      | 568.8211         | 10 |
| 6  | 691.4025         | 346.2049        | 673.3919        | 337.1996         | T    | <b>1055.5772</b> | 528.2922        | 1038.5506       | 519.7789         | 1037.5666      | 519.2869         | 9  |
| 7  | 854.4658         | 427.7366        | 836.4553        | 418.7313         | Y    | <b>954.5295</b>  | 477.7684        | 937.5029        | 469.2551         | 936.5189       | 468.7631         | 8  |
| 8  | 953.5342         | 477.2708        | 935.5237        | 468.2655         | V    | <b>791.4662</b>  | 396.2367        | 774.4396        | 387.7234         | 773.4556       | 387.2314         | 7  |
| 9  | 1050.5870        | 525.7971        | 1032.5764       | 516.7919         | P    | <b>692.3977</b>  | 346.7025        | 675.3712        | 338.1892         | 674.3872       | 337.6972         | 6  |
| 10 | 1149.6554        | 575.3313        | 1131.6448       | 566.3261         | V    | 595.3450         | 298.1761        | 578.3184        | 289.6629         | 577.3344       | 289.1708         | 5  |
| 11 | 1250.7031        | 625.8552        | 1232.6925       | 616.8499         | T    | <b>496.2766</b>  | 248.6419        | 479.2500        | 240.1286         | 478.2660       | 239.6366         | 4  |
| 12 | 1351.7508        | 676.3790        | 1333.7402       | 667.3737         | T    | 395.2289         | 198.1181        | <b>378.2023</b> | 189.6048         | 377.2183       | 189.1128         | 3  |
| 13 | <b>1498.8192</b> | 749.9132        | 1480.8086       | 740.9079         | F    | 294.1812         | 147.5942        | <b>277.1547</b> | 139.0810         |                |                  | 2  |
| 14 |                  |                 |                 |                  | K    | 147.1128         | 74.0600         | 130.0863        | 65.5468          |                |                  | 1  |

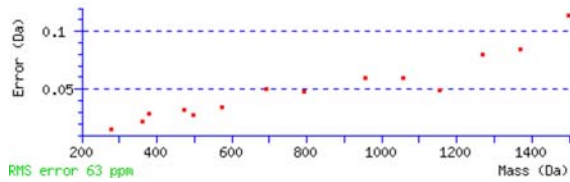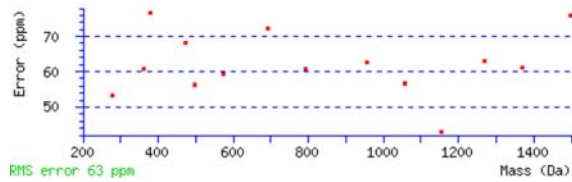

## Peptide View

MS/MS Fragmentation of **MLGSPVDSVLFYAITTLHNLHLLHQEGAK**

Found in [gi|6671684|ref|NP\\_031640.1](#), catenin (cadherin associated protein), beta 1, 88kDa [Mus musculus]

Match to Query 865: 3066.676096 from(767.676300,4+)

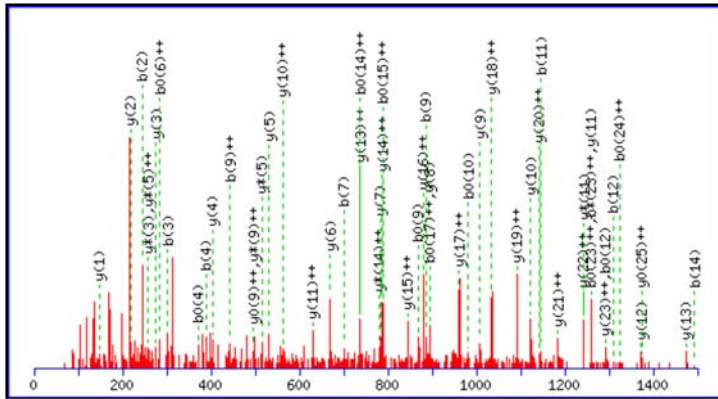

Monoisotopic mass of neutral peptide  $M_r(\text{calc})$ : 3066.6211

Ions Score: 68 Expect: 0.0016

Matches (Bold Red): 54/276 fragment ions using 134 most intense peaks

| #  | b                | b <sup>++</sup> | b*        | b* <sup>++</sup> | b <sup>0</sup>   | b <sup>0++</sup> | Seq. | y                | y <sup>++</sup>  | y*               | y* <sup>++</sup> | y <sup>0</sup> | y <sup>0++</sup> | #  |
|----|------------------|-----------------|-----------|------------------|------------------|------------------|------|------------------|------------------|------------------|------------------|----------------|------------------|----|
| 1  | 132.0478         | 66.5275         |           |                  |                  |                  | M    |                  |                  |                  |                  |                |                  | 28 |
| 2  | <b>245.1318</b>  | 123.0695        |           |                  |                  |                  | L    | 2936.5880        | 1468.7976        | 2919.5614        | 1460.2843        | 2918.5774      | 1459.7923        | 27 |
| 3  | <b>302.1533</b>  | 151.5803        |           |                  |                  |                  | G    | 2823.5039        | 1412.2556        | 2806.4774        | 1403.7423        | 2805.4933      | 1403.2503        | 26 |
| 4  | <b>389.1853</b>  | 195.0963        |           |                  | <b>371.1747</b>  | 186.0910         | S    | 2766.4824        | 1383.7449        | 2749.4559        | 1375.2316        | 2748.4719      | <b>1374.7396</b> | 25 |
| 5  | 486.2381         | 243.6227        |           |                  | 468.2275         | 234.6174         | P    | 2679.4504        | 1340.2288        | 2662.4239        | 1331.7156        | 2661.4398      | 1331.2236        | 24 |
| 6  | 585.3065         | 293.1569        |           |                  | 567.2959         | <b>284.1516</b>  | V    | 2582.3977        | <b>1291.7025</b> | 2565.3711        | 1283.1892        | 2564.3871      | 1282.6972        | 23 |
| 7  | <b>700.3334</b>  | 350.6703        |           |                  | 682.3229         | 341.6651         | D    | 2483.3292        | <b>1242.1683</b> | 2466.3027        | 1233.6550        | 2465.3187      | 1233.1630        | 22 |
| 8  | 787.3654         | 394.1864        |           |                  | 769.3549         | 385.1811         | S    | 2368.3023        | <b>1184.6548</b> | 2351.2758        | 1176.1415        | 2350.2917      | 1175.6495        | 21 |
| 9  | <b>886.4339</b>  | <b>443.7206</b> |           |                  | <b>868.4233</b>  | 434.7153         | V    | 2281.2703        | <b>1141.1388</b> | 2264.2437        | 1132.6255        | 2263.2597      | 1132.1335        | 20 |
| 10 | 999.5179         | 500.2626        |           |                  | <b>981.5074</b>  | 491.2573         | L    | 2182.2019        | <b>1091.6046</b> | 2165.1753        | 1083.0913        | 2164.1913      | 1082.5993        | 19 |
| 11 | <b>1146.5863</b> | 573.7968        |           |                  | 1128.5758        | 564.7915         | F    | 2069.1178        | <b>1035.0625</b> | 2052.0913        | 1026.5493        | 2051.1072      | 1026.0573        | 18 |
| 12 | <b>1309.6497</b> | 655.3285        |           |                  | <b>1291.6391</b> | 646.3232         | Y    | 1922.0494        | <b>961.5283</b>  | 1905.0228        | 953.0151         | 1904.0388      | 952.5231         | 17 |
| 13 | 1380.6868        | 690.8470        |           |                  | 1362.6762        | 681.8417         | A    | 1758.9861        | <b>879.9967</b>  | 1741.9595        | 871.4834         | 1740.9755      | 870.9914         | 16 |
| 14 | <b>1493.7708</b> | 747.3891        |           |                  | 1475.7603        | <b>738.3838</b>  | I    | 1687.9490        | <b>844.4781</b>  | 1670.9224        | 835.9648         | 1669.9384      | 835.4728         | 15 |
| 15 | 1594.8185        | 797.9129        |           |                  | 1576.8079        | <b>788.9076</b>  | T    | 1574.8649        | <b>787.9361</b>  | 1557.8383        | <b>779.4228</b>  | 1556.8543      | 778.9308         | 14 |
| 16 | 1695.8662        | 848.4367        |           |                  | 1677.8556        | 839.4314         | T    | <b>1473.8172</b> | <b>737.4122</b>  | 1456.7907        | 728.8990         | 1455.8066      | 728.4070         | 13 |
| 17 | 1808.9502        | 904.9788        |           |                  | 1790.9397        | <b>895.9735</b>  | L    | <b>1372.7695</b> | 686.8884         | 1355.7430        | 678.3751         | 1354.7590      | 677.8831         | 12 |
| 18 | 1946.0092        | 973.5082        |           |                  | 1927.9986        | 964.5029         | H    | <b>1259.6855</b> | <b>630.3464</b>  | <b>1242.6589</b> | 621.8331         | 1241.6749      | 621.3411         | 11 |
| 19 | 2060.0521        | 1030.5297       | 2043.0255 | 1022.0164        | 2042.0415        | 1021.5244        | N    | <b>1122.6266</b> | <b>561.8169</b>  | 1105.6000        | 553.3036         | 1104.6160      | 552.8116         | 10 |
| 20 | 2173.1361        | 1087.0717       | 2156.1096 | 1078.5584        | 2155.1256        | 1078.0664        | L    | <b>1008.5836</b> | 504.7955         | 991.5571         | <b>496.2822</b>  | 990.5731       | <b>495.7902</b>  | 9  |
| 21 | 2286.2202        | 1143.6137       | 2269.1937 | 1135.1005        | 2268.2096        | 1134.6085        | L    | <b>895.4996</b>  | 448.2534         | 878.4730         | 439.7401         | 877.4890       | 439.2481         | 8  |
| 22 | 2399.3043        | 1200.1558       | 2382.2777 | 1191.6425        | 2381.2937        | 1191.1505        | L    | <b>782.4155</b>  | 391.7114         | 765.3890         | 383.1981         | 764.4049       | 382.7061         | 7  |
| 23 | 2536.3632        | 1268.6852       | 2519.3366 | <b>1260.1720</b> | 2518.3526        | <b>1259.6799</b> | H    | <b>669.3315</b>  | 335.1694         | 652.3049         | 326.6561         | 651.3209       | 326.1641         | 6  |
| 24 | 2664.4218        | 1332.7145       | 2647.3952 | 1324.2012        | 2646.4112        | <b>1323.7092</b> | Q    | <b>532.2725</b>  | 266.6399         | <b>515.2460</b>  | <b>258.1266</b>  | 514.2620       | 257.6346         | 5  |
| 25 | 2793.4643        | 1397.2358       | 2776.4378 | 1388.7225        | 2775.4538        | 1388.2305        | E    | <b>404.2140</b>  | 202.6106         | 387.1874         | 194.0973         | 386.2034       | 193.6053         | 4  |
| 26 | 2850.4858        | 1425.7465       | 2833.4593 | 1417.2333        | 2832.4752        | 1416.7413        | G    | <b>275.1714</b>  | 138.0893         | <b>258.1448</b>  | 129.5760         |                |                  | 3  |
| 27 | 2921.5229        | 1461.2651       | 2904.4964 | 1452.7518        | 2903.5124        | 1452.2598        | A    | <b>218.1499</b>  | 109.5786         | 201.1234         | 101.0653         |                |                  | 2  |
| 28 |                  |                 |           |                  |                  |                  | K    | <b>147.1128</b>  | 74.0600          | 130.0863         | 65.5468          |                |                  | 1  |

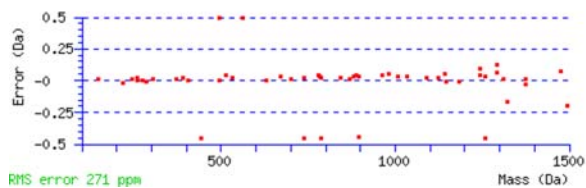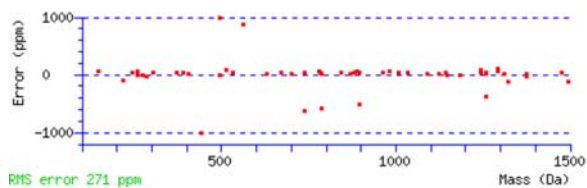



## Peptide View

MS/MS Fragmentation of **MNFANVFIGANPLAVDLLEK**

Found in **gi|10092590|ref|NP\_036081.1**, mitogen activated protein kinase 14 [Mus musculus]

Match to Query 1164: 2175.267848 from(1088.641200,2+)

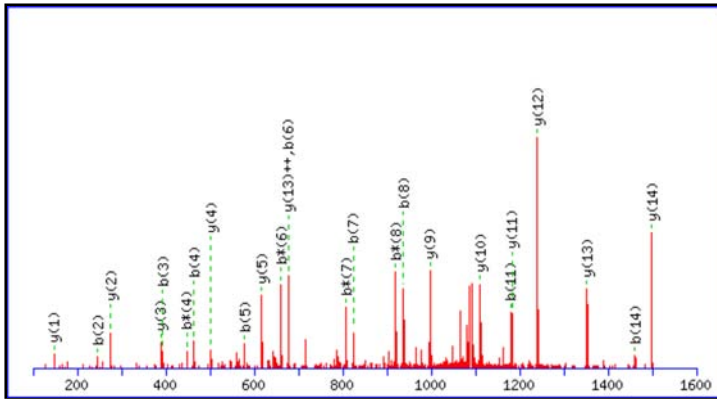

Monoisotopic mass of neutral peptide  $M_r(\text{calc})$ : 2175.1397

Ions Score: 100 Expect: 5.1e-007

Matches (**Bold Red**): 25/194 fragment ions using 31 most intense peaks

| #  | b                | b <sup>++</sup> | b*              | b* <sup>++</sup> | b <sup>0</sup> | b <sup>0++</sup> | Seq.     | y                | y <sup>++</sup> | y*        | y* <sup>++</sup> | y <sup>0</sup> | y <sup>0++</sup> | #         |
|----|------------------|-----------------|-----------------|------------------|----------------|------------------|----------|------------------|-----------------|-----------|------------------|----------------|------------------|-----------|
| 1  | 132.0478         | 66.5275         |                 |                  |                |                  | <b>M</b> |                  |                 |           |                  |                |                  | <b>20</b> |
| 2  | <b>246.0907</b>  | 123.5490        | 229.0641        | 115.0357         |                |                  | <b>N</b> | 2045.1066        | 1023.0569       | 2028.0800 | 1014.5436        | 2027.0960      | 1014.0516        | <b>19</b> |
| 3  | <b>393.1591</b>  | 197.0832        | 376.1325        | 188.5699         |                |                  | <b>F</b> | 1931.0636        | 966.0354        | 1914.0371 | 957.5222         | 1913.0531      | 957.0302         | <b>18</b> |
| 4  | <b>464.1962</b>  | 232.6017        | <b>447.1697</b> | 224.0885         |                |                  | <b>A</b> | 1783.9952        | 892.5012        | 1766.9687 | 883.9880         | 1765.9846      | 883.4960         | <b>17</b> |
| 5  | <b>578.2391</b>  | 289.6232        | 561.2126        | 281.1099         |                |                  | <b>N</b> | 1712.9581        | 856.9827        | 1695.9316 | 848.4694         | 1694.9475      | 847.9774         | <b>16</b> |
| 6  | <b>677.3075</b>  | 339.1574        | <b>660.2810</b> | 330.6441         |                |                  | <b>V</b> | 1598.9152        | 799.9612        | 1581.8886 | 791.4479         | 1580.9046      | 790.9559         | <b>15</b> |
| 7  | <b>824.3760</b>  | 412.6916        | <b>807.3494</b> | 404.1783         |                |                  | <b>F</b> | <b>1499.8468</b> | 750.4270        | 1482.8202 | 741.9137         | 1481.8362      | 741.4217         | <b>14</b> |
| 8  | <b>937.4600</b>  | 469.2336        | <b>920.4335</b> | 460.7204         |                |                  | <b>I</b> | <b>1352.7784</b> | <b>676.8928</b> | 1335.7518 | 668.3795         | 1334.7678      | 667.8875         | <b>13</b> |
| 9  | 994.4815         | 497.7444        | 977.4549        | 489.2311         |                |                  | <b>G</b> | <b>1239.6943</b> | 620.3508        | 1222.6677 | 611.8375         | 1221.6837      | 611.3455         | <b>12</b> |
| 10 | 1065.5186        | 533.2629        | 1048.4920       | 524.7497         |                |                  | <b>A</b> | <b>1182.6728</b> | 591.8401        | 1165.6463 | 583.3268         | 1164.6623      | 582.8348         | <b>11</b> |
| 11 | <b>1179.5615</b> | 590.2844        | 1162.5350       | 581.7711         |                |                  | <b>N</b> | <b>1111.6357</b> | 556.3215        | 1094.6092 | 547.8082         | 1093.6252      | 547.3162         | <b>10</b> |
| 12 | 1276.6143        | 638.8108        | 1259.5877       | 630.2975         |                |                  | <b>P</b> | <b>997.5928</b>  | 499.3000        | 980.5662  | 490.7868         | 979.5822       | 490.2948         | <b>9</b>  |
| 13 | 1389.6983        | 695.3528        | 1372.6718       | 686.8395         |                |                  | <b>L</b> | 900.5400         | 450.7737        | 883.5135  | 442.2604         | 882.5295       | 441.7684         | <b>8</b>  |
| 14 | <b>1460.7354</b> | 730.8714        | 1443.7089       | 722.3581         |                |                  | <b>A</b> | 787.4560         | 394.2316        | 770.4294  | 385.7183         | 769.4454       | 385.2263         | <b>7</b>  |
| 15 | 1559.8039        | 780.4056        | 1542.7773       | 771.8923         |                |                  | <b>V</b> | 716.4189         | 358.7131        | 699.3923  | 350.1998         | 698.4083       | 349.7078         | <b>6</b>  |
| 16 | 1674.8308        | 837.9190        | 1657.8042       | 829.4058         | 1656.8202      | 828.9138         | <b>D</b> | <b>617.3505</b>  | 309.1789        | 600.3239  | 300.6656         | 599.3399       | 300.1736         | <b>5</b>  |
| 17 | 1787.9149        | 894.4611        | 1770.8883       | 885.9478         | 1769.9043      | 885.4558         | <b>L</b> | <b>502.3235</b>  | 251.6654        | 485.2970  | 243.1521         | 484.3129       | 242.6601         | <b>4</b>  |
| 18 | 1900.9989        | 951.0031        | 1883.9724       | 942.4898         | 1882.9884      | 941.9978         | <b>L</b> | <b>389.2395</b>  | 195.1234        | 372.2129  | 186.6101         | 371.2289       | 186.1181         | <b>3</b>  |
| 19 | 2030.0415        | 1015.5244       | 2013.0150       | 1007.0111        | 2012.0309      | 1006.5191        | <b>E</b> | <b>276.1554</b>  | 138.5813        | 259.1288  | 130.0681         | 258.1448       | 129.5761         | <b>2</b>  |
| 20 |                  |                 |                 |                  |                |                  | <b>K</b> | <b>147.1128</b>  | 74.0600         | 130.0863  | 65.5468          |                |                  | <b>1</b>  |

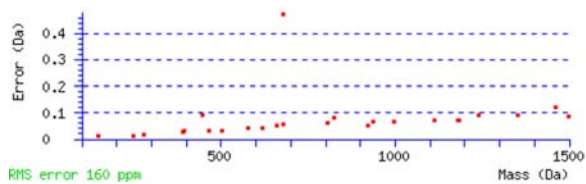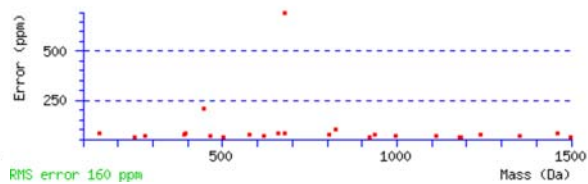

## Peptide View

MS/MS Fragmentation of **MQSLTLDVLTSELLAK**

Found in [gi|94419105|ref|XP\\_001005781.1|](#), PREDICTED: similar to Development and differentiation-enhancing factor 2 (Pyk2 C-terminus associate

Match to Query 466: 1931.148448 from(966.581500,2+)

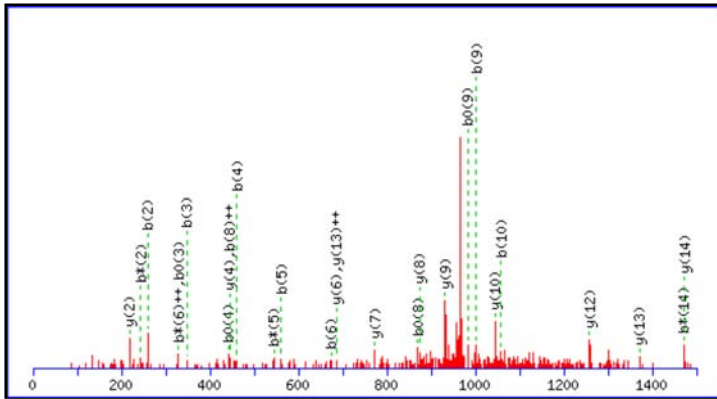

Monoisotopic mass of neutral peptide  $M_r(\text{calc})$ : 1931.0649

Ions Score: 50 Expect: 0.038

Matches (Bold Red): 27/188 fragment ions using 55 most intense peaks

| #  | b                | b <sup>++</sup> | b*               | b <sup>*++</sup> | b <sup>0</sup>  | b <sup>0++</sup> | Seq.     | y                | y <sup>++</sup> | y*        | y <sup>*++</sup> | y <sup>0</sup> | y <sup>0++</sup> | #  |
|----|------------------|-----------------|------------------|------------------|-----------------|------------------|----------|------------------|-----------------|-----------|------------------|----------------|------------------|----|
| 1  | 132.0478         | 66.5275         |                  |                  |                 |                  | <b>M</b> |                  |                 |           |                  |                |                  | 18 |
| 2  | <b>260.1063</b>  | 130.5568        | <b>243.0798</b>  | 122.0435         |                 |                  | <b>Q</b> | 1801.0317        | 901.0195        | 1784.0051 | 892.5062         | 1783.0211      | 892.0142         | 17 |
| 3  | <b>347.1384</b>  | 174.0728        | 330.1118         | 165.5595         | <b>329.1278</b> | 165.0675         | <b>S</b> | 1672.9731        | 836.9902        | 1655.9465 | 828.4769         | 1654.9625      | 827.9849         | 16 |
| 4  | <b>460.2224</b>  | 230.6149        | 443.1959         | 222.1016         | <b>442.2119</b> | 221.6096         | <b>L</b> | 1585.9411        | 793.4742        | 1568.9145 | 784.9609         | 1567.9305      | 784.4689         | 15 |
| 5  | <b>561.2701</b>  | 281.1387        | <b>544.2436</b>  | 272.6254         | 543.2595        | 272.1334         | <b>T</b> | <b>1472.8570</b> | 736.9321        | 1455.8305 | 728.4189         | 1454.8464      | 727.9269         | 14 |
| 6  | <b>674.3542</b>  | 337.6807        | 657.3276         | <b>329.1674</b>  | 656.3436        | 328.6754         | <b>L</b> | <b>1371.8093</b> | <b>686.4083</b> | 1354.7828 | 677.8950         | 1353.7988      | 677.4030         | 13 |
| 7  | 789.3811         | 395.1942        | 772.3546         | 386.6809         | 771.3705        | 386.1889         | <b>D</b> | <b>1258.7253</b> | 629.8663        | 1241.6987 | 621.3530         | 1240.7147      | 620.8610         | 12 |
| 8  | 888.4495         | <b>444.7284</b> | 871.4230         | 436.2151         | <b>870.4390</b> | 435.7231         | <b>V</b> | 1143.6983        | 572.3528        | 1126.6718 | 563.8395         | 1125.6878      | 563.3475         | 11 |
| 9  | <b>1001.5336</b> | 501.2704        | 984.5070         | 492.7572         | <b>983.5230</b> | 492.2651         | <b>L</b> | <b>1044.6299</b> | 522.8186        | 1027.6034 | 514.3053         | 1026.6193      | 513.8133         | 10 |
| 10 | <b>1058.5550</b> | 529.7812        | 1041.5285        | 521.2679         | 1040.5445       | 520.7759         | <b>G</b> | <b>931.5459</b>  | 466.2766        | 914.5193  | 457.7633         | 913.5353       | 457.2713         | 9  |
| 11 | 1159.6027        | 580.3050        | 1142.5762        | 571.7917         | 1141.5922       | 571.2997         | <b>T</b> | <b>874.5244</b>  | 437.7658        | 857.4978  | 429.2526         | 856.5138       | 428.7606         | 8  |
| 12 | 1246.6347        | 623.8210        | 1229.6082        | 615.3077         | 1228.6242       | 614.8157         | <b>S</b> | <b>773.4767</b>  | 387.2420        | 756.4502  | 378.7287         | 755.4661       | 378.2367         | 7  |
| 13 | 1375.6773        | 688.3423        | 1358.6508        | 679.8290         | 1357.6668       | 679.3370         | <b>E</b> | <b>686.4447</b>  | 343.7260        | 669.4181  | 335.2127         | 668.4341       | 334.7207         | 6  |
| 14 | 1488.7614        | 744.8843        | <b>1471.7348</b> | 736.3711         | 1470.7508       | 735.8791         | <b>L</b> | 557.4021         | 279.2047        | 540.3755  | 270.6914         |                |                  | 5  |
| 15 | 1601.8455        | 801.4264        | 1584.8189        | 792.9131         | 1583.8349       | 792.4211         | <b>L</b> | <b>444.3180</b>  | 222.6627        | 427.2915  | 214.1494         |                |                  | 4  |
| 16 | 1714.9295        | 857.9684        | 1697.9030        | 849.4551         | 1696.9190       | 848.9631         | <b>L</b> | 331.2340         | 166.1206        | 314.2074  | 157.6073         |                |                  | 3  |
| 17 | 1785.9666        | 893.4870        | 1768.9401        | 884.9737         | 1767.9561       | 884.4817         | <b>A</b> | <b>218.1499</b>  | 109.5786        | 201.1234  | 101.0653         |                |                  | 2  |
| 18 |                  |                 |                  |                  |                 |                  | <b>K</b> | 147.1128         | 74.0600         | 130.0863  | 65.5468          |                |                  | 1  |

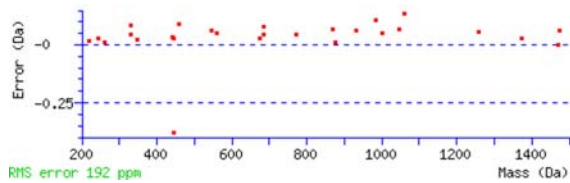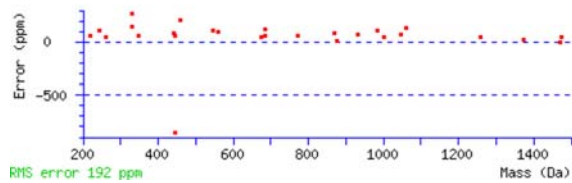

## Peptide View

MS/MS Fragmentation of **MSATFIGNSTAIQELFK**

Found in [gi|21746161|ref|NP\\_076205.1](#), tubulin, beta [Mus musculus]

Match to Query 625: 1856.952648 from(929.483600,2+)

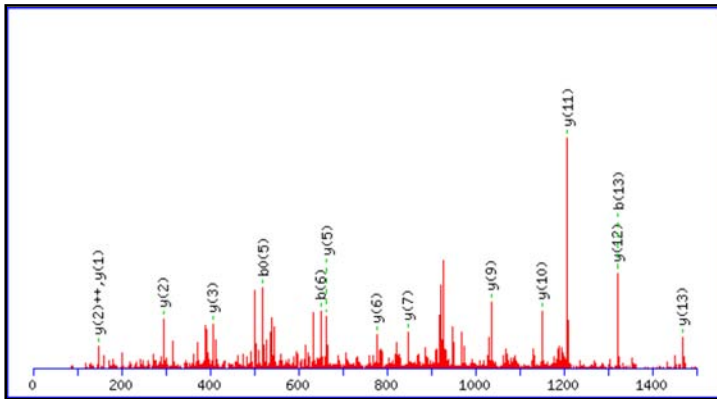

Monoisotopic mass of neutral peptide  $M_r(\text{calc})$ : 1856.9342

Ions Score: 77 Expect:  $6.2 \times 10^{-5}$

Matches (**Bold Red**): 15/170 fragment ions using 32 most intense peaks

| #  | b                | b <sup>++</sup> | b*        | b* <sup>++</sup> | b <sup>0</sup>  | b <sup>0++</sup> | Seq.     | y                | y <sup>++</sup> | y*        | y* <sup>++</sup> | y <sup>0</sup> | y <sup>0++</sup> | #         |
|----|------------------|-----------------|-----------|------------------|-----------------|------------------|----------|------------------|-----------------|-----------|------------------|----------------|------------------|-----------|
| 1  | 132.0478         | 66.5275         |           |                  |                 |                  | <b>M</b> |                  |                 |           |                  |                |                  | <b>17</b> |
| 2  | 219.0798         | 110.0435        |           |                  | 201.0692        | 101.0382         | <b>S</b> | 1726.9010        | 863.9541        | 1709.8745 | 855.4409         | 1708.8904      | 854.9489         | <b>16</b> |
| 3  | 290.1169         | 145.5621        |           |                  | 272.1063        | 136.5568         | <b>A</b> | 1639.8690        | 820.4381        | 1622.8424 | 811.9248         | 1621.8584      | 811.4328         | <b>15</b> |
| 4  | 391.1646         | 196.0859        |           |                  | 373.1540        | 187.0806         | <b>T</b> | 1568.8319        | 784.9196        | 1551.8053 | 776.4063         | 1550.8213      | 775.9143         | <b>14</b> |
| 5  | 538.2330         | 269.6201        |           |                  | <b>520.2224</b> | 260.6148         | <b>F</b> | <b>1467.7842</b> | 734.3957        | 1450.7576 | 725.8825         | 1449.7736      | 725.3904         | <b>13</b> |
| 6  | <b>651.3170</b>  | 326.1622        |           |                  | 633.3065        | 317.1569         | <b>I</b> | <b>1320.7158</b> | 660.8615        | 1303.6892 | 652.3482         | 1302.7052      | 651.8562         | <b>12</b> |
| 7  | 708.3385         | 354.6729        |           |                  | 690.3279        | 345.6676         | <b>G</b> | <b>1207.6317</b> | 604.3195        | 1190.6052 | 595.8062         | 1189.6211      | 595.3142         | <b>11</b> |
| 8  | 822.3814         | 411.6944        | 805.3549  | 403.1811         | 804.3709        | 402.6891         | <b>N</b> | <b>1150.6103</b> | 575.8088        | 1133.5837 | 567.2955         | 1132.5997      | 566.8035         | <b>10</b> |
| 9  | 909.4135         | 455.2104        | 892.3869  | 446.6971         | 891.4029        | 446.2051         | <b>S</b> | <b>1036.5673</b> | 518.7873        | 1019.5408 | 510.2740         | 1018.5568      | 509.7820         | <b>9</b>  |
| 10 | 1010.4611        | 505.7342        | 993.4346  | 497.2209         | 992.4506        | 496.7289         | <b>T</b> | 949.5353         | 475.2713        | 932.5087  | 466.7580         | 931.5247       | 466.2660         | <b>8</b>  |
| 11 | 1081.4983        | 541.2528        | 1064.4717 | 532.7395         | 1063.4877       | 532.2475         | <b>A</b> | <b>848.4876</b>  | 424.7474        | 831.4611  | 416.2342         | 830.4770       | 415.7422         | <b>7</b>  |
| 12 | 1194.5823        | 597.7948        | 1177.5558 | 589.2815         | 1176.5718       | 588.7895         | <b>I</b> | <b>777.4505</b>  | 389.2289        | 760.4240  | 380.7156         | 759.4399       | 380.2236         | <b>6</b>  |
| 13 | <b>1322.6409</b> | 661.8241        | 1305.6143 | 653.3108         | 1304.6303       | 652.8188         | <b>Q</b> | <b>664.3664</b>  | 332.6869        | 647.3399  | 324.1736         | 646.3559       | 323.6816         | <b>5</b>  |
| 14 | 1451.6835        | 726.3454        | 1434.6569 | 717.8321         | 1433.6729       | 717.3401         | <b>E</b> | 536.3079         | 268.6576        | 519.2813  | 260.1443         | 518.2973       | 259.6523         | <b>4</b>  |
| 15 | 1564.7675        | 782.8874        | 1547.7410 | 774.3741         | 1546.7570       | 773.8821         | <b>L</b> | <b>407.2653</b>  | 204.1363        | 390.2387  | 195.6230         |                |                  | <b>3</b>  |
| 16 | 1711.8360        | 856.4216        | 1694.8094 | 847.9083         | 1693.8254       | 847.4163         | <b>F</b> | <b>294.1812</b>  | <b>147.5942</b> | 277.1547  | 139.0810         |                |                  | <b>2</b>  |
| 17 |                  |                 |           |                  |                 |                  | <b>K</b> | <b>147.1128</b>  | 74.0600         | 130.0863  | 65.5468          |                |                  | <b>1</b>  |

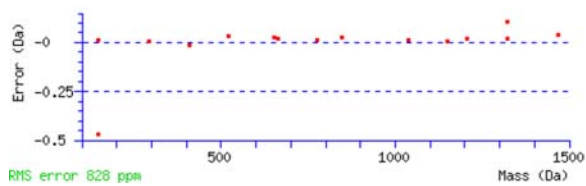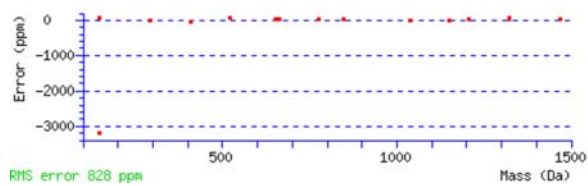

## Peptide View

MS/MS Fragmentation of **MTQIMFEAFNTPAMYVAIQAVLSLYASGR**

Found in [gi|30425250|ref|NP\\_780706.1](#), hypothetical protein LOC238880 [Mus musculus]

Match to Query 898: 3253.778472 from(1085.600100,3+)

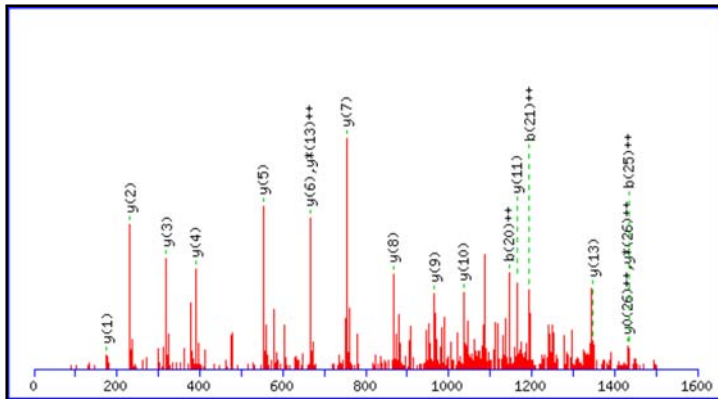

Monoisotopic mass of neutral peptide  $M_r(\text{calc})$ : 3254.5813

Variable modifications:

M1 : Oxidation (M)

M14 : Oxidation (M)

Ions Score: 62 Expect: 0.0065

Matches (**Bold Red**): 18/326 fragment ions using 27 most intense peaks

| #  | b         | b <sup>++</sup>  | b*        | b <sup>*++</sup> | b <sup>0</sup> | b <sup>0++</sup> | Seq.     | y                | y <sup>++</sup> | y*        | y <sup>*++</sup> | y <sup>0</sup> | y <sup>0++</sup> | #  |
|----|-----------|------------------|-----------|------------------|----------------|------------------|----------|------------------|-----------------|-----------|------------------|----------------|------------------|----|
| 1  | 148.0427  | 74.5250          |           |                  |                |                  | <b>M</b> |                  |                 |           |                  |                |                  | 29 |
| 2  | 249.0904  | 125.0488         |           |                  | 231.0798       | 116.0435         | T        | 3108.5532        | 1554.7803       | 3091.5267 | 1546.2670        | 3090.5427      | 1545.7750        | 28 |
| 3  | 377.1489  | 189.0781         | 360.1224  | 180.5648         | 359.1384       | 180.0728         | Q        | 3007.5056        | 1504.2564       | 2990.4790 | 1495.7431        | 2989.4950      | 1495.2511        | 27 |
| 4  | 490.2330  | 245.6201         | 473.2064  | 237.1069         | 472.2224       | 236.6149         | I        | 2879.4470        | 1440.2271       | 2862.4204 | <b>1431.7139</b> | 2861.4364      | <b>1431.2218</b> | 26 |
| 5  | 621.2735  | 311.1404         | 604.2469  | 302.6271         | 603.2629       | 302.1351         | M        | 2766.3629        | 1383.6851       | 2749.3364 | 1375.1718        | 2748.3524      | 1374.6798        | 25 |
| 6  | 768.3419  | 384.6746         | 751.3153  | 376.1613         | 750.3313       | 375.6693         | F        | 2635.3224        | 1318.1649       | 2618.2959 | 1309.6516        | 2617.3119      | 1309.1596        | 24 |
| 7  | 897.3845  | 449.1959         | 880.3579  | 440.6826         | 879.3739       | 440.1906         | E        | 2488.2540        | 1244.6307       | 2471.2275 | 1236.1174        | 2470.2435      | 1235.6254        | 23 |
| 8  | 968.4216  | 484.7144         | 951.3950  | 476.2012         | 950.4110       | 475.7091         | A        | 2359.2114        | 1180.1094       | 2342.1849 | 1171.5961        | 2341.2009      | 1171.1041        | 22 |
| 9  | 1115.4900 | 558.2486         | 1098.4634 | 549.7354         | 1097.4794      | 549.2434         | F        | 2288.1743        | 1144.5908       | 2271.1478 | 1136.0775        | 2270.1638      | 1135.5855        | 21 |
| 10 | 1229.5329 | 615.2701         | 1212.5064 | 606.7568         | 1211.5224      | 606.2648         | N        | 2141.1059        | 1071.0566       | 2124.0794 | 1062.5433        | 2123.0954      | 1062.0513        | 20 |
| 11 | 1330.5806 | 665.7939         | 1313.5541 | 657.2807         | 1312.5700      | 656.7887         | T        | 2027.0630        | 1014.0351       | 2010.0364 | 1005.5219        | 2009.0524      | 1005.0299        | 19 |
| 12 | 1427.6334 | 714.3203         | 1410.6068 | 705.8070         | 1409.6228      | 705.3150         | P        | 1926.0153        | 963.5113        | 1908.9888 | 954.9980         | 1908.0047      | 954.5060         | 18 |
| 13 | 1498.6705 | 749.8389         | 1481.6439 | 741.3256         | 1480.6599      | 740.8336         | A        | 1828.9626        | 914.9849        | 1811.9360 | 906.4716         | 1810.9520      | 905.9796         | 17 |
| 14 | 1645.7059 | 823.3566         | 1628.6793 | 814.8433         | 1627.6953      | 814.3513         | M        | 1757.9254        | 879.4664        | 1740.8989 | 870.9531         | 1739.9149      | 870.4611         | 16 |
| 15 | 1808.7692 | 904.8882         | 1791.7427 | 896.3750         | 1790.7586      | 895.8830         | Y        | 1610.8900        | 805.9487        | 1593.8635 | 797.4354         | 1592.8795      | 796.9434         | 15 |
| 16 | 1907.8376 | 954.4224         | 1890.8111 | 945.9092         | 1889.8270      | 945.4172         | V        | 1447.8267        | 724.4170        | 1430.8002 | 715.9037         | 1429.8161      | 715.4117         | 14 |
| 17 | 1978.8747 | 989.9410         | 1961.8482 | 981.4277         | 1960.8642      | 980.9357         | A        | <b>1348.7583</b> | 674.8828        | 1331.7318 | <b>666.3695</b>  | 1330.7477      | 665.8775         | 13 |
| 18 | 2091.9588 | 1046.4830        | 2074.9322 | 1037.9698        | 2073.9482      | 1037.4777        | I        | 1277.7212        | 639.3642        | 1260.6946 | 630.8510         | 1259.7106      | 630.3590         | 12 |
| 19 | 2220.0174 | 1110.5123        | 2202.9908 | 1101.9990        | 2202.0068      | 1101.5070        | Q        | <b>1164.6371</b> | 582.8222        | 1147.6106 | 574.3089         | 1146.6266      | 573.8169         | 11 |
| 20 | 2291.0545 | <b>1146.0309</b> | 2274.0279 | 1137.5176        | 2273.0439      | 1137.0256        | A        | <b>1036.5786</b> | 518.7929        | 1019.5520 | 510.2796         | 1018.5680      | 509.7876         | 10 |
| 21 | 2390.1229 | <b>1195.5651</b> | 2373.0963 | 1187.0518        | 2372.1123      | 1186.5598        | V        | <b>965.5414</b>  | 483.2744        | 948.5149  | 474.7611         | 947.5309       | 474.2691         | 9  |
| 22 | 2503.2069 | 1252.1071        | 2486.1804 | 1243.5938        | 2485.1964      | 1243.1018        | L        | <b>866.4730</b>  | 433.7402        | 849.4465  | 425.2269         | 848.4625       | 424.7349         | 8  |
| 23 | 2590.2390 | 1295.6231        | 2573.2124 | 1287.1099        | 2572.2284      | 1286.6178        | S        | <b>753.3890</b>  | 377.1981        | 736.3624  | 368.6848         | 735.3784       | 368.1928         | 7  |
| 24 | 2703.3230 | 1352.1652        | 2686.2965 | 1343.6519        | 2685.3125      | 1343.1599        | L        | <b>666.3569</b>  | 333.6821        | 649.3304  | 325.1688         | 648.3464       | 324.6768         | 6  |
| 25 | 2866.3864 | <b>1433.6968</b> | 2849.3598 | 1425.1835        | 2848.3758      | 1424.6915        | Y        | <b>553.2729</b>  | 277.1401        | 536.2463  | 268.6268         | 535.2623       | 268.1348         | 5  |
| 26 | 2937.4235 | 1469.2154        | 2920.3969 | 1460.7021        | 2919.4129      | 1460.2101        | A        | <b>390.2096</b>  | 195.6084        | 373.1830  | 187.0951         | 372.1990       | 186.6031         | 4  |
| 27 | 3024.4555 | 1512.7314        | 3007.4290 | 1504.2181        | 3006.4449      | 1503.7261        | S        | <b>319.1724</b>  | 160.0899        | 302.1459  | 151.5766         | 301.1619       | 151.0846         | 3  |
| 28 | 3081.4770 | 1541.2421        | 3064.4504 | 1532.7288        | 3063.4664      | 1532.2368        | G        | <b>232.1404</b>  | 116.5738        | 215.1139  | 108.0606         |                |                  | 2  |
| 29 |           |                  |           |                  |                |                  | R        | <b>175.1190</b>  | 88.0631         | 158.0924  | 79.5498          |                |                  | 1  |

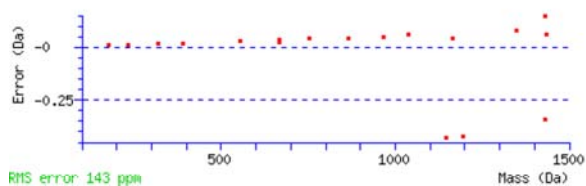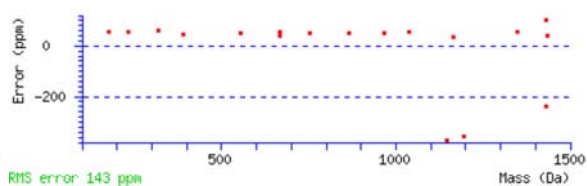

## Peptide View

MS/MS Fragmentation of **NIAGALAFWMANASELLNFIK**

Found in [gi|94402335|ref|XP\\_916103.2|](#), PREDICTED: similar to Afadin (Af-6 protein) isoform 4 [Mus musculus]

Match to Query 807: 2293.378048 from(1147.696300,2+)

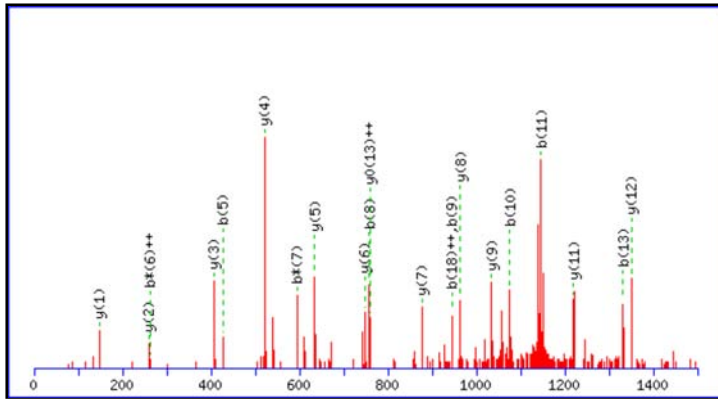

Monoisotopic mass of neutral peptide  $M_r(\text{calc})$ : 2293.1928

Ions Score: 76 Expect: 0.00013

Matches (**Bold Red**): 21/202 fragment ions using 36 most intense peaks

| #  | b                | b <sup>++</sup> | b*              | b* <sup>++</sup> | b <sup>0</sup> | b <sup>0++</sup> | Seq.     | y                | y <sup>++</sup> | y*        | y* <sup>++</sup> | y <sup>0</sup> | y <sup>0++</sup> | #         |
|----|------------------|-----------------|-----------------|------------------|----------------|------------------|----------|------------------|-----------------|-----------|------------------|----------------|------------------|-----------|
| 1  | 115.0502         | 58.0287         | 98.0237         | 49.5155          |                |                  | <b>N</b> |                  |                 |           |                  |                |                  | <b>21</b> |
| 2  | 228.1343         | 114.5708        | 211.1077        | 106.0575         |                |                  | <b>I</b> | 2180.1572        | 1090.5822       | 2163.1307 | 1082.0690        | 2162.1466      | 1081.5770        | <b>20</b> |
| 3  | 299.1714         | 150.0893        | 282.1448        | 141.5761         |                |                  | <b>A</b> | 2067.0731        | 1034.0402       | 2050.0466 | 1025.5269        | 2049.0626      | 1025.0349        | <b>19</b> |
| 4  | 356.1928         | 178.6001        | 339.1663        | 170.0868         |                |                  | <b>G</b> | 1996.0360        | 998.5217        | 1979.0095 | 990.0084         | 1978.0255      | 989.5164         | <b>18</b> |
| 5  | <b>427.2299</b>  | 214.1186        | 410.2034        | 205.6053         |                |                  | <b>A</b> | 1939.0146        | 970.0109        | 1921.9880 | 961.4976         | 1921.0040      | 961.0056         | <b>17</b> |
| 6  | 540.3140         | 270.6606        | 523.2875        | <b>262.1474</b>  |                |                  | <b>L</b> | 1867.9775        | 934.4924        | 1850.9509 | 925.9791         | 1849.9669      | 925.4871         | <b>16</b> |
| 7  | 611.3511         | 306.1792        | <b>594.3246</b> | 297.6659         |                |                  | <b>A</b> | 1754.8934        | 877.9503        | 1737.8669 | 869.4371         | 1736.8828      | 868.9451         | <b>15</b> |
| 8  | <b>758.4195</b>  | 379.7134        | 741.3930        | 371.2001         |                |                  | <b>F</b> | 1683.8563        | 842.4318        | 1666.8297 | 833.9185         | 1665.8457      | 833.4265         | <b>14</b> |
| 9  | <b>944.4988</b>  | 472.7531        | 927.4723        | 464.2398         |                |                  | <b>W</b> | 1536.7879        | 768.8976        | 1519.7613 | 760.3843         | 1518.7773      | <b>759.8923</b>  | <b>13</b> |
| 10 | <b>1075.5393</b> | 538.2733        | 1058.5128       | 529.7600         |                |                  | <b>M</b> | <b>1350.7086</b> | 675.8579        | 1333.6820 | 667.3446         | 1332.6980      | 666.8526         | <b>12</b> |
| 11 | <b>1146.5764</b> | 573.7919        | 1129.5499       | 565.2786         |                |                  | <b>A</b> | <b>1219.6681</b> | 610.3377        | 1202.6415 | 601.8244         | 1201.6575      | 601.3324         | <b>11</b> |
| 12 | 1260.6194        | 630.8133        | 1243.5928       | 622.3000         |                |                  | <b>N</b> | 1148.6310        | 574.8191        | 1131.6044 | 566.3059         | 1130.6204      | 565.8138         | <b>10</b> |
| 13 | <b>1331.6565</b> | 666.3319        | 1314.6299       | 657.8186         |                |                  | <b>A</b> | <b>1034.5881</b> | 517.7977        | 1017.5615 | 509.2844         | 1016.5775      | 508.7924         | <b>9</b>  |
| 14 | 1418.6885        | 709.8479        | 1401.6619       | 701.3346         | 1400.6779      | 700.8426         | <b>S</b> | <b>963.5509</b>  | 482.2791        | 946.5244  | 473.7658         | 945.5404       | 473.2738         | <b>8</b>  |
| 15 | 1547.7311        | 774.3692        | 1530.7045       | 765.8559         | 1529.7205      | 765.3639         | <b>E</b> | <b>876.5189</b>  | 438.7631        | 859.4924  | 430.2498         | 858.5083       | 429.7578         | <b>7</b>  |
| 16 | 1660.8151        | 830.9112        | 1643.7886       | 822.3979         | 1642.8046      | 821.9059         | <b>L</b> | <b>747.4763</b>  | 374.2418        | 730.4498  | 365.7285         |                |                  | <b>6</b>  |
| 17 | 1773.8992        | 887.4532        | 1756.8727       | 878.9400         | 1755.8886      | 878.4480         | <b>L</b> | <b>634.3923</b>  | 317.6998        | 617.3657  | 309.1865         |                |                  | <b>5</b>  |
| 18 | 1887.9421        | <b>944.4747</b> | 1870.9156       | 935.9614         | 1869.9316      | 935.4694         | <b>N</b> | <b>521.3082</b>  | 261.1577        | 504.2817  | 252.6445         |                |                  | <b>4</b>  |
| 19 | 2035.0105        | 1018.0089       | 2017.9840       | 1009.4956        | 2017.0000      | 1009.0036        | <b>F</b> | <b>407.2653</b>  | 204.1363        | 390.2387  | 195.6230         |                |                  | <b>3</b>  |
| 20 | 2148.0946        | 1074.5509       | 2131.0681       | 1066.0377        | 2130.0840      | 1065.5457        | <b>I</b> | <b>260.1969</b>  | 130.6021        | 243.1703  | 122.0888         |                |                  | <b>2</b>  |
| 21 |                  |                 |                 |                  |                |                  | <b>K</b> | <b>147.1128</b>  | 74.0600         | 130.0863  | 65.5468          |                |                  | <b>1</b>  |

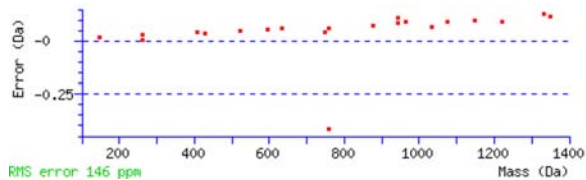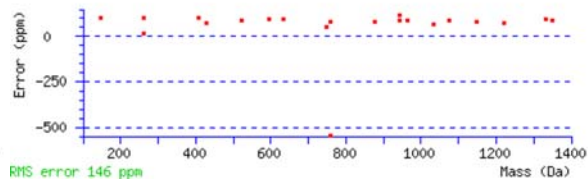

## Peptide View

MS/MS Fragmentation of **NIILEGKEILVGDVGQTVDDPYTTFFVK**

Found in [gi|6680924|ref|NP\\_031713.1](#), cofilin 1, non-muscle [Mus musculus]

Match to Query 401: 3091.676172 from(1031.566000,3+)

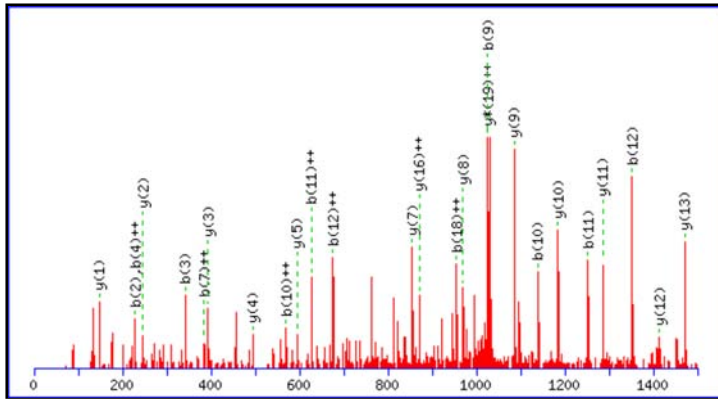

Monoisotopic mass of neutral peptide Mr(calc): 3091.5964

Ions Score: 61 Expect: 0.0078

Matches (Bold Red): 26/310 fragment ions using 47 most intense peaks

| #  | b                | b <sup>++</sup> | b*        | b <sup>*++</sup> | b <sup>0</sup> | b <sup>0++</sup> | Seq. | y                | y <sup>++</sup> | y*        | y <sup>*++</sup> | y <sup>0</sup> | y <sup>0++</sup> | #  |
|----|------------------|-----------------|-----------|------------------|----------------|------------------|------|------------------|-----------------|-----------|------------------|----------------|------------------|----|
| 1  | 115.0502         | 58.0287         | 98.0237   | 49.5155          |                |                  | N    |                  |                 |           |                  |                |                  | 28 |
| 2  | <b>228.1343</b>  | 114.5708        | 211.1077  | 106.0575         |                |                  | I    | 2978.5608        | 1489.7840       | 2961.5342 | 1481.2708        | 2960.5502      | 1480.7788        | 27 |
| 3  | <b>341.2183</b>  | 171.1128        | 324.1918  | 162.5995         |                |                  | I    | 2865.4767        | 1433.2420       | 2848.4502 | 1424.7287        | 2847.4662      | 1424.2367        | 26 |
| 4  | 454.3024         | <b>227.6548</b> | 437.2758  | 219.1416         |                |                  | L    | 2752.3927        | 1376.7000       | 2735.3661 | 1368.1867        | 2734.3821      | 1367.6947        | 25 |
| 5  | 583.3450         | 292.1761        | 566.3184  | 283.6629         | 565.3344       | 283.1708         | E    | 2639.3086        | 1320.1579       | 2622.2821 | 1311.6447        | 2621.2980      | 1311.1527        | 24 |
| 6  | 712.3876         | 356.6974        | 695.3610  | 348.1841         | 694.3770       | 347.6921         | E    | 2510.2660        | 1255.6366       | 2493.2395 | 1247.1234        | 2492.2555      | 1246.6314        | 23 |
| 7  | 769.4090         | <b>385.2082</b> | 752.3825  | 376.6949         | 751.3985       | 376.2029         | G    | 2381.2234        | 1191.1154       | 2364.1969 | 1182.6021        | 2363.2129      | 1182.1101        | 22 |
| 8  | 897.5040         | 449.2556        | 880.4774  | 440.7424         | 879.4934       | 440.2503         | K    | 2324.2020        | 1162.6046       | 2307.1754 | 1154.0913        | 2306.1914      | 1153.5993        | 21 |
| 9  | <b>1026.5466</b> | 513.7769        | 1009.5200 | 505.2637         | 1008.5360      | 504.7716         | E    | 2196.1070        | 1098.5571       | 2179.0805 | 1090.0439        | 2178.0964      | 1089.5519        | 20 |
| 10 | <b>1139.6306</b> | <b>570.3190</b> | 1122.6041 | 561.8057         | 1121.6201      | 561.3137         | I    | 2067.0644        | 1034.0358       | 2050.0379 | <b>1025.5226</b> | 2049.0539      | 1025.0306        | 19 |
| 11 | <b>1252.7147</b> | <b>626.8610</b> | 1235.6881 | 618.3477         | 1234.7041      | 617.8557         | L    | 1953.9804        | 977.4938        | 1936.9538 | 968.9805         | 1935.9698      | 968.4885         | 18 |
| 12 | <b>1351.7831</b> | <b>676.3952</b> | 1334.7566 | 667.8819         | 1333.7725      | 667.3899         | V    | 1840.8963        | 920.9518        | 1823.8698 | 912.4385         | 1822.8857      | 911.9465         | 17 |
| 13 | 1408.8046        | 704.9059        | 1391.7780 | 696.3926         | 1390.7940      | 695.9006         | G    | 1741.8279        | <b>871.4176</b> | 1724.8013 | 862.9043         | 1723.8173      | 862.4123         | 16 |
| 14 | 1523.8315        | 762.4194        | 1506.8050 | 753.9061         | 1505.8209      | 753.4141         | D    | 1684.8064        | 842.9069        | 1667.7799 | 834.3936         | 1666.7959      | 833.9016         | 15 |
| 15 | 1622.8999        | 811.9536        | 1605.8734 | 803.4403         | 1604.8894      | 802.9483         | V    | 1569.7795        | 785.3934        | 1552.7529 | 776.8801         | 1551.7689      | 776.3881         | 14 |
| 16 | 1679.9214        | 840.4643        | 1662.8948 | 831.9511         | 1661.9108      | 831.4590         | G    | <b>1470.7111</b> | 735.8592        | 1453.6845 | 727.3459         | 1452.7005      | 726.8539         | 13 |
| 17 | 1807.9800        | 904.4936        | 1790.9534 | 895.9803         | 1789.9694      | 895.4883         | Q    | <b>1413.6896</b> | 707.3484        | 1396.6631 | 698.8352         | 1395.6791      | 698.3432         | 12 |
| 18 | 1909.0276        | <b>955.0175</b> | 1892.0011 | 946.5042         | 1891.0171      | 946.0122         | T    | <b>1285.6310</b> | 643.3192        | 1268.6045 | 634.8059         | 1267.6205      | 634.3139         | 11 |
| 19 | 2008.0960        | 1004.5517       | 1991.0695 | 996.0384         | 1990.0855      | 995.5464         | V    | <b>1184.5834</b> | 592.7953        | 1167.5568 | 584.2820         | 1166.5728      | 583.7900         | 10 |
| 20 | 2123.1230        | 1062.0651       | 2106.0964 | 1053.5519        | 2105.1124      | 1053.0598        | D    | <b>1085.5150</b> | 543.2611        | 1068.4884 | 534.7478         | 1067.5044      | 534.2558         | 9  |
| 21 | 2238.1499        | 1119.5786       | 2221.1234 | 1111.0653        | 2220.1394      | 1110.5733        | D    | <b>970.4880</b>  | 485.7476        | 953.4615  | 477.2344         | 952.4774       | 476.7424         | 8  |
| 22 | 2335.2027        | 1168.1050       | 2318.1761 | 1159.5917        | 2317.1921      | 1159.0997        | P    | <b>855.4611</b>  | 428.2342        | 838.4345  | 419.7209         | 837.4505       | 419.2289         | 7  |
| 23 | 2498.2660        | 1249.6366       | 2481.2395 | 1241.1234        | 2480.2555      | 1240.6314        | Y    | 758.4083         | 379.7078        | 741.3818  | 371.1945         | 740.3977       | 370.7025         | 6  |
| 24 | 2599.3137        | 1300.1605       | 2582.2871 | 1291.6472        | 2581.3031      | 1291.1552        | T    | <b>595.3450</b>  | 298.1761        | 578.3184  | 289.6629         | 577.3344       | 289.1708         | 5  |
| 25 | 2700.3614        | 1350.6843       | 2683.3348 | 1342.1711        | 2682.3508      | 1341.6790        | T    | <b>494.2973</b>  | 247.6523        | 477.2708  | 239.1390         | 476.2867       | 238.6470         | 4  |
| 26 | 2847.4298        | 1424.2185       | 2830.4032 | 1415.7053        | 2829.4192      | 1415.2132        | F    | <b>393.2496</b>  | 197.1284        | 376.2231  | 188.6152         |                |                  | 3  |
| 27 | 2946.4982        | 1473.7527       | 2929.4716 | 1465.2395        | 2928.4876      | 1464.7475        | V    | <b>246.1812</b>  | 123.5942        | 229.1547  | 115.0810         |                |                  | 2  |
| 28 |                  |                 |           |                  |                |                  | K    | <b>147.1128</b>  | 74.0600         | 130.0863  | 65.5468          |                |                  | 1  |

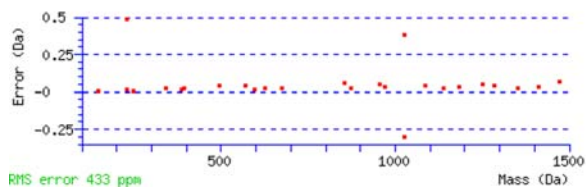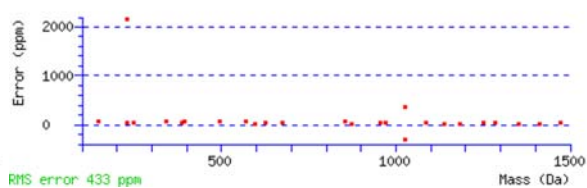



## Peptide View

MS/MS Fragmentation of **NQVAMNPTNTVFDK**

Found in [gi|31981690|ref|NP\\_112442.2](#), heat shock protein 8 [Mus musculus]

Match to Query 378: 1648.860248 from(825.437400,2+)

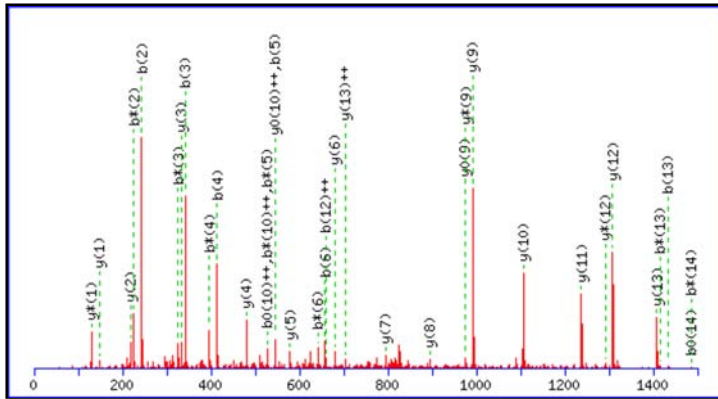

Monoisotopic mass of neutral peptide  $M_r(\text{calc})$ : 1648.7879

Ions Score: 86 Expect: 5.2e-006

Matches (**Bold Red**): 36/150 fragment ions using 74 most intense peaks

| #  | b                | b <sup>++</sup> | b*               | b* <sup>++</sup> | b <sup>0</sup>   | b <sup>0++</sup> | Seq. | y                | y <sup>++</sup> | y*               | y* <sup>++</sup> | y <sup>0</sup>  | y <sup>0++</sup> | #  |
|----|------------------|-----------------|------------------|------------------|------------------|------------------|------|------------------|-----------------|------------------|------------------|-----------------|------------------|----|
| 1  | 115.0502         | 58.0287         | 98.0237          | 49.5155          |                  |                  | N    |                  |                 |                  |                  |                 |                  | 15 |
| 2  | <b>243.1088</b>  | 122.0580        | <b>226.0822</b>  | 113.5448         |                  |                  | Q    | 1535.7522        | 768.3798        | 1518.7257        | 759.8665         | 1517.7417       | 759.3745         | 14 |
| 3  | <b>342.1772</b>  | 171.5922        | <b>325.1506</b>  | 163.0790         |                  |                  | V    | <b>1407.6937</b> | <b>704.3505</b> | 1390.6671        | 695.8372         | 1389.6831       | 695.3452         | 13 |
| 4  | <b>413.2143</b>  | 207.1108        | <b>396.1878</b>  | 198.5975         |                  |                  | A    | <b>1308.6252</b> | 654.8163        | <b>1291.5987</b> | 646.3030         | 1290.6147       | 645.8110         | 12 |
| 5  | <b>544.2548</b>  | 272.6310        | <b>527.2282</b>  | 264.1178         |                  |                  | M    | <b>1237.5881</b> | 619.2977        | 1220.5616        | 610.7844         | 1219.5776       | 610.2924         | 11 |
| 6  | <b>658.2977</b>  | 329.6525        | <b>641.2712</b>  | 321.1392         |                  |                  | N    | <b>1106.5477</b> | 553.7775        | 1089.5211        | 545.2642         | 1088.5371       | <b>544.7722</b>  | 10 |
| 7  | 755.3505         | 378.1789        | 738.3239         | 369.6656         |                  |                  | P    | <b>992.5047</b>  | 496.7560        | <b>975.4782</b>  | 488.2427         | <b>974.4942</b> | 487.7507         | 9  |
| 8  | 856.3982         | 428.7027        | 839.3716         | 420.1894         | 838.3876         | 419.6974         | T    | <b>895.4520</b>  | 448.2296        | 878.4254         | 439.7163         | 877.4414        | 439.2243         | 8  |
| 9  | 970.4411         | 485.7242        | 953.4145         | 477.2109         | 952.4305         | 476.7189         | N    | <b>794.4043</b>  | 397.7058        | 777.3777         | 389.1925         | 776.3937        | 388.7005         | 7  |
| 10 | 1071.4888        | 536.2480        | 1054.4622        | <b>527.7347</b>  | 1053.4782        | <b>527.2427</b>  | T    | <b>680.3614</b>  | 340.6843        | 663.3348         | 332.1710         | 662.3508        | 331.6790         | 6  |
| 11 | 1170.5572        | 585.7822        | 1153.5306        | 577.2690         | 1152.5466        | 576.7769         | V    | <b>579.3137</b>  | 290.1605        | 562.2871         | 281.6472         | 561.3031        | 281.1552         | 5  |
| 12 | 1317.6256        | <b>659.3164</b> | 1300.5990        | 650.8032         | 1299.6150        | 650.3111         | F    | <b>480.2453</b>  | 240.6263        | 463.2187         | 232.1130         | 462.2347        | 231.6210         | 4  |
| 13 | <b>1432.6525</b> | 716.8299        | <b>1415.6260</b> | 708.3166         | 1414.6420        | 707.8246         | D    | <b>333.1769</b>  | 167.0921        | 316.1503         | 158.5788         | 315.1663        | 158.0868         | 3  |
| 14 | 1503.6896        | 752.3485        | <b>1486.6631</b> | 743.8352         | <b>1485.6791</b> | 743.3432         | A    | <b>218.1499</b>  | 109.5786        | 201.1234         | 101.0653         |                 |                  | 2  |
| 15 |                  |                 |                  |                  |                  |                  | K    | <b>147.1128</b>  | 74.0600         | <b>130.0863</b>  | 65.5468          |                 |                  | 1  |

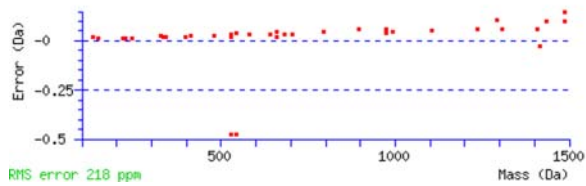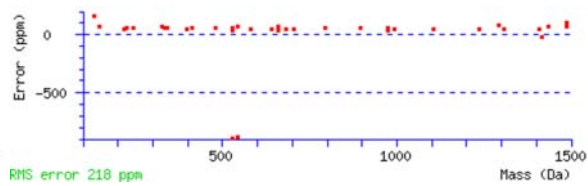

## Peptide View

MS/MS Fragmentation of **QAGGGAGPPNPSLNGSAPR**

Found in [gi|63723564|ref|XP\\_484699.2](#), PREDICTED: similar to src homology 2 domain-containing transforming protein C [Mus musculus]

Match to Query 633: 1703.928048 from(852.971300,2+)

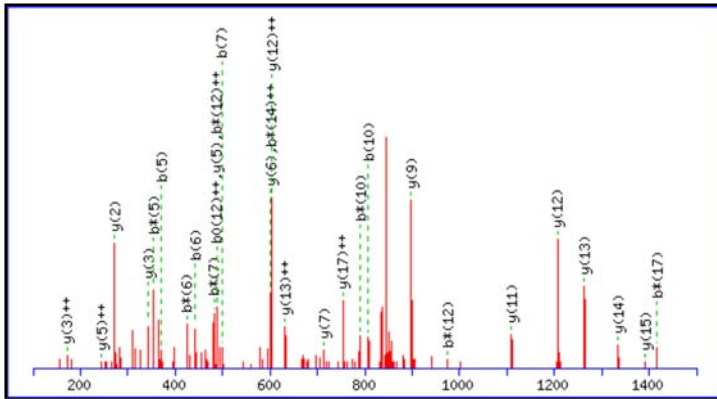

Monoisotopic mass of neutral peptide Mr(calc): 1703.8339

Ions Score: 56 Expect: 0.006

Matches (Bold Red): 29/188 fragment ions using 68 most intense peaks

| #  | b               | b <sup>++</sup> | b*               | b* <sup>++</sup> | b <sup>0</sup> | b <sup>0++</sup> | Seq. | y                | y <sup>++</sup> | y*        | y* <sup>++</sup> | y <sup>0</sup> | y <sup>0++</sup> | #  |
|----|-----------------|-----------------|------------------|------------------|----------------|------------------|------|------------------|-----------------|-----------|------------------|----------------|------------------|----|
| 1  | 129.0659        | 65.0366         | 112.0393         | 56.5233          |                |                  | Q    |                  |                 |           |                  |                |                  | 19 |
| 2  | 200.1030        | 100.5551        | 183.0764         | 92.0418          |                |                  | A    | 1576.7826        | 788.8949        | 1559.7561 | 780.3817         | 1558.7720      | 779.8897         | 18 |
| 3  | 257.1244        | 129.0659        | 240.0979         | 120.5526         |                |                  | G    | 1505.7455        | <b>753.3764</b> | 1488.7189 | 744.8631         | 1487.7349      | 744.3711         | 17 |
| 4  | 314.1459        | 157.5766        | 297.1193         | 149.0633         |                |                  | G    | 1448.7240        | 724.8657        | 1431.6975 | 716.3524         | 1430.7135      | 715.8604         | 16 |
| 5  | <b>371.1673</b> | 186.0873        | <b>354.1408</b>  | 177.5740         |                |                  | G    | <b>1391.7026</b> | 696.3549        | 1374.6760 | 687.8416         | 1373.6920      | 687.3496         | 15 |
| 6  | <b>442.2045</b> | 221.6059        | <b>425.1779</b>  | 213.0926         |                |                  | A    | <b>1334.6811</b> | 667.8442        | 1317.6546 | 659.3309         | 1316.6705      | 658.8389         | 14 |
| 7  | <b>499.2259</b> | 250.1166        | <b>482.1994</b>  | 241.6033         |                |                  | G    | <b>1263.6440</b> | <b>632.3256</b> | 1246.6175 | 623.8124         | 1245.6334      | 623.3204         | 13 |
| 8  | 596.2787        | 298.6430        | 579.2521         | 290.1297         |                |                  | P    | <b>1206.6225</b> | <b>603.8149</b> | 1189.5960 | 595.3016         | 1188.6120      | 594.8096         | 12 |
| 9  | 693.3314        | 347.1694        | 676.3049         | 338.6561         |                |                  | P    | <b>1109.5698</b> | 555.2885        | 1092.5432 | 546.7753         | 1091.5592      | 546.2832         | 11 |
| 10 | <b>807.3744</b> | 404.1908        | <b>790.3478</b>  | 395.6775         |                |                  | N    | 1012.5170        | 506.7621        | 995.4905  | 498.2489         | 994.5065       | 497.7569         | 10 |
| 11 | 904.4271        | 452.7172        | 887.4006         | 444.2039         |                |                  | P    | <b>898.4741</b>  | 449.7407        | 881.4475  | 441.2274         | 880.4635       | 440.7354         | 9  |
| 12 | 991.4592        | 496.2332        | <b>974.4326</b>  | <b>487.7199</b>  | 973.4486       | <b>487.2279</b>  | S    | 801.4213         | 401.2143        | 784.3948  | 392.7010         | 783.4108       | 392.2090         | 8  |
| 13 | 1104.5432       | 552.7752        | 1087.5167        | 544.2620         | 1086.5327      | 543.7700         | L    | <b>714.3893</b>  | 357.6983        | 697.3628  | 349.1850         | 696.3787       | 348.6930         | 7  |
| 14 | 1218.5861       | 609.7967        | 1201.5596        | <b>601.2834</b>  | 1200.5756      | 600.7914         | N    | <b>601.3052</b>  | 301.1563        | 584.2787  | 292.6430         | 583.2947       | 292.1510         | 6  |
| 15 | 1275.6076       | 638.3074        | 1258.5811        | 629.7942         | 1257.5970      | 629.3022         | G    | <b>487.2623</b>  | <b>244.1348</b> | 470.2358  | 235.6215         | 469.2517       | 235.1295         | 5  |
| 16 | 1362.6396       | 681.8235        | 1345.6131        | 673.3102         | 1344.6291      | 672.8182         | S    | 430.2409         | 215.6241        | 413.2143  | 207.1108         | 412.2303       | 206.6188         | 4  |
| 17 | 1433.6767       | 717.3420        | <b>1416.6502</b> | 708.8287         | 1415.6662      | 708.3367         | A    | <b>343.2088</b>  | <b>172.1080</b> | 326.1823  | 163.5948         |                |                  | 3  |
| 18 | 1530.7295       | 765.8684        | 1513.7030        | 757.3551         | 1512.7189      | 756.8631         | P    | <b>272.1717</b>  | 136.5895        | 255.1452  | 128.0762         |                |                  | 2  |
| 19 |                 |                 |                  |                  |                |                  | R    | 175.1190         | 88.0631         | 158.0924  | 79.5498          |                |                  | 1  |

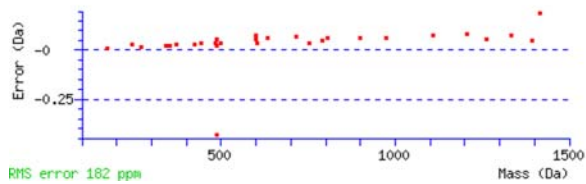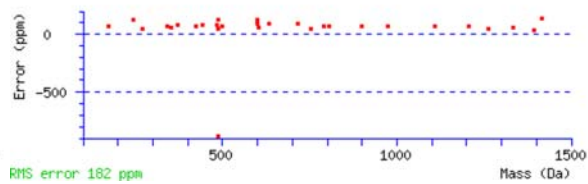

## Peptide View

MS/MS Fragmentation of **QPVIIMELVPGDFLFLR**

Found in [gi|6679773|ref|NP\\_032026.1](#), fer (fms/fps related) protein kinase, testis specific 2 isoform b [Mus musculus]

Match to Query 740: 2313.282648 from(1157.648600,2+)

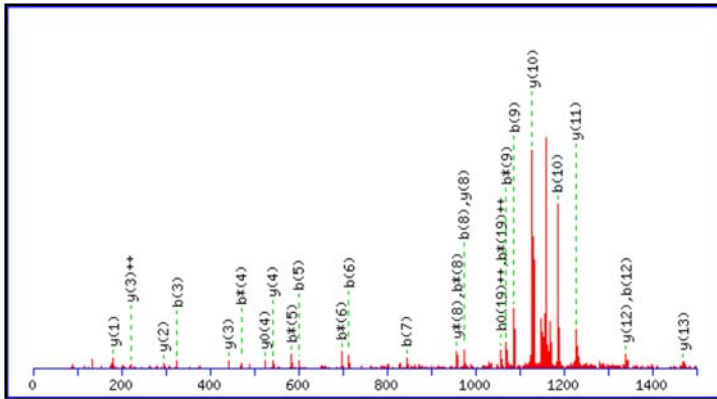

Monoisotopic mass of neutral peptide  $M_r(\text{calc})$ : 2313.2538

Variable modifications:

R20 : Arginine-1306 (R-1306)

Ions Score: 53 Expect: 0.033

Matches (Bold Red): 27/208 fragment ions using 45 most intense peaks

| #  | b                | b <sup>++</sup> | b*               | b* <sup>++</sup> | b <sup>0</sup> | b <sup>0++</sup> | Seq. | y                | y <sup>++</sup> | y*              | y* <sup>++</sup> | y <sup>0</sup>  | y <sup>0++</sup> | #  |
|----|------------------|-----------------|------------------|------------------|----------------|------------------|------|------------------|-----------------|-----------------|------------------|-----------------|------------------|----|
| 1  | 129.0659         | 65.0366         | 112.0393         | 56.5233          |                |                  | Q    |                  |                 |                 |                  |                 |                  | 20 |
| 2  | 226.1186         | 113.5629        | 209.0921         | 105.0497         |                |                  | P    | 2186.2025        | 1093.6049       | 2169.1759       | 1085.0916        | 2168.1919       | 1084.5996        | 19 |
| 3  | <b>325.1870</b>  | 163.0972        | 308.1605         | 154.5839         |                |                  | V    | 2089.1497        | 1045.0785       | 2072.1232       | 1036.5652        | 2071.1392       | 1036.0732        | 18 |
| 4  | 488.2504         | 244.6288        | <b>471.2238</b>  | 236.1155         |                |                  | Y    | 1990.0813        | 995.5443        | 1973.0548       | 987.0310         | 1972.0707       | 986.5390         | 17 |
| 5  | <b>601.3344</b>  | 301.1708        | <b>584.3079</b>  | 292.6576         |                |                  | I    | 1827.0180        | 914.0126        | 1809.9914       | 905.4994         | 1809.0074       | 905.0073         | 16 |
| 6  | <b>714.4185</b>  | 357.7129        | <b>697.3919</b>  | 349.1996         |                |                  | I    | 1713.9339        | 857.4706        | 1696.9074       | 848.9573         | 1695.9234       | 848.4653         | 15 |
| 7  | <b>845.4590</b>  | 423.2331        | 828.4324         | 414.7198         |                |                  | M    | 1600.8499        | 800.9286        | 1583.8233       | 792.4153         | 1582.8393       | 791.9233         | 14 |
| 8  | <b>974.5015</b>  | 487.7544        | <b>957.4750</b>  | 479.2411         | 956.4910       | 478.7491         | E    | <b>1469.8094</b> | 735.4083        | 1452.7828       | 726.8951         | 1451.7988       | 726.4030         | 13 |
| 9  | <b>1087.5856</b> | 544.2964        | <b>1070.5591</b> | 535.7832         | 1069.5750      | 535.2912         | L    | <b>1340.7668</b> | 670.8870        | 1323.7402       | 662.3738         | 1322.7562       | 661.8817         | 12 |
| 10 | <b>1186.6540</b> | 593.8306        | 1169.6275        | 585.3174         | 1168.6435      | 584.8254         | V    | <b>1227.6827</b> | 614.3450        | 1210.6562       | 605.8317         | 1209.6722       | 605.3397         | 11 |
| 11 | 1283.7068        | 642.3570        | 1266.6802        | 633.8438         | 1265.6962      | 633.3517         | P    | <b>1128.6143</b> | 564.8108        | 1111.5878       | 556.2975         | 1110.6038       | 555.8055         | 10 |
| 12 | <b>1340.7282</b> | 670.8678        | 1323.7017        | 662.3545         | 1322.7177      | 661.8625         | G    | 1031.5616        | 516.2844        | 1014.5350       | 507.7711         | 1013.5510       | 507.2791         | 9  |
| 13 | 1397.7497        | 699.3785        | 1380.7231        | 690.8652         | 1379.7391      | 690.3732         | G    | <b>974.5401</b>  | 487.7737        | <b>957.5135</b> | 479.2604         | 956.5295        | 478.7684         | 8  |
| 14 | 1512.7766        | 756.8920        | 1495.7501        | 748.3787         | 1494.7661      | 747.8867         | D    | 917.5186         | 459.2630        | 900.4921        | 450.7497         | 899.5081        | 450.2577         | 7  |
| 15 | 1659.8450        | 830.4262        | 1642.8185        | 821.9129         | 1641.8345      | 821.4209         | F    | 802.4917         | 401.7495        | 785.4651        | 393.2362         | 784.4811        | 392.7442         | 6  |
| 16 | 1772.9291        | 886.9682        | 1755.9026        | 878.4549         | 1754.9185      | 877.9629         | L    | 655.4233         | 328.2153        | 638.3967        | 319.7020         | 637.4127        | 319.2100         | 5  |
| 17 | 1873.9768        | 937.4920        | 1856.9502        | 928.9788         | 1855.9662      | 928.4867         | T    | <b>542.3392</b>  | 271.6733        | 525.3127        | 263.1600         | <b>524.3287</b> | 262.6680         | 4  |
| 18 | 2021.0452        | 1011.0262       | 2004.0186        | 1002.5130        | 2003.0346      | 1002.0210        | F    | <b>441.2915</b>  | <b>221.1494</b> | 424.2650        | 212.6361         |                 |                  | 3  |
| 19 | 2134.1293        | 1067.5683       | 2117.1027        | <b>1059.0550</b> | 2116.1187      | <b>1058.5630</b> | L    | <b>294.2231</b>  | 147.6152        | 277.1966        | 139.1019         |                 |                  | 2  |
| 20 |                  |                 |                  |                  |                |                  | R    | <b>181.1391</b>  | 91.0732         | 164.1125        | 82.5599          |                 |                  | 1  |

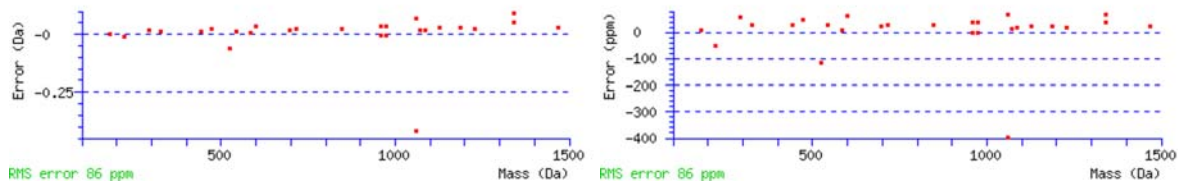

## Peptide View

MS/MS Fragmentation of **SDVWSFGILLTELTTK**

Found in [gi|70794809|ref|NP\\_001020566.1](#), Rous sarcoma oncogene isoform 2 [Mus musculus]

Match to Query 678: 1809.103448 from(905.559000,2+)

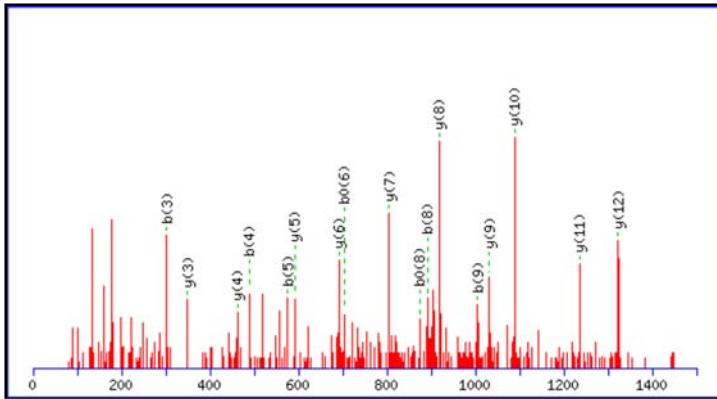

Monoisotopic mass of neutral peptide  $M_r(\text{calc})$ : 1808.9560

Ions Score: 62 Expect: 0.0026

Matches (**Bold Red**): 17/148 fragment ions using 35 most intense peaks

| #  | b                | b <sup>++</sup> | b <sup>0</sup>  | b <sup>0++</sup> | Seq.     | y                | y <sup>++</sup> | y*        | y* <sup>++</sup> | y <sup>0</sup> | y <sup>0++</sup> | #  |
|----|------------------|-----------------|-----------------|------------------|----------|------------------|-----------------|-----------|------------------|----------------|------------------|----|
| 1  | 88.0393          | 44.5233         | 70.0287         | 35.5180          | <b>S</b> |                  |                 |           |                  |                |                  | 16 |
| 2  | 203.0662         | 102.0368        | 185.0557        | 93.0315          | <b>D</b> | 1722.9312        | 861.9693        | 1705.9047 | 853.4560         | 1704.9207      | 852.9640         | 15 |
| 3  | <b>302.1347</b>  | 151.5710        | 284.1241        | 142.5657         | <b>V</b> | 1607.9043        | 804.4558        | 1590.8777 | 795.9425         | 1589.8937      | 795.4505         | 14 |
| 4  | <b>488.2140</b>  | 244.6106        | 470.2034        | 235.6053         | <b>W</b> | 1508.8359        | 754.9216        | 1491.8093 | 746.4083         | 1490.8253      | 745.9163         | 13 |
| 5  | <b>575.2460</b>  | 288.1266        | 557.2354        | 279.1214         | <b>S</b> | <b>1322.7566</b> | 661.8819        | 1305.7300 | 653.3686         | 1304.7460      | 652.8766         | 12 |
| 6  | 722.3144         | 361.6608        | <b>704.3038</b> | 352.6556         | <b>F</b> | <b>1235.7245</b> | 618.3659        | 1218.6980 | 609.8526         | 1217.7140      | 609.3606         | 11 |
| 7  | 779.3359         | 390.1716        | 761.3253        | 381.1663         | <b>G</b> | <b>1088.6561</b> | 544.8317        | 1071.6296 | 536.3184         | 1070.6456      | 535.8264         | 10 |
| 8  | <b>892.4199</b>  | 446.7136        | <b>874.4094</b> | 437.7083         | <b>I</b> | <b>1031.6347</b> | 516.3210        | 1014.6081 | 507.8077         | 1013.6241      | 507.3157         | 9  |
| 9  | <b>1005.5040</b> | 503.2556        | 987.4934        | 494.2503         | <b>L</b> | <b>918.5506</b>  | 459.7789        | 901.5241  | 451.2657         | 900.5400       | 450.7737         | 8  |
| 10 | 1118.5880        | 559.7977        | 1100.5775       | 550.7924         | <b>L</b> | <b>805.4666</b>  | 403.2369        | 788.4400  | 394.7236         | 787.4560       | 394.2316         | 7  |
| 11 | 1219.6357        | 610.3215        | 1201.6252       | 601.3162         | <b>T</b> | <b>692.3825</b>  | 346.6949        | 675.3559  | 338.1816         | 674.3719       | 337.6896         | 6  |
| 12 | 1348.6783        | 674.8428        | 1330.6678       | 665.8375         | <b>E</b> | <b>591.3348</b>  | 296.1710        | 574.3083  | 287.6578         | 573.3242       | 287.1658         | 5  |
| 13 | 1461.7624        | 731.3848        | 1443.7518       | 722.3795         | <b>L</b> | <b>462.2922</b>  | 231.6497        | 445.2657  | 223.1365         | 444.2817       | 222.6445         | 4  |
| 14 | 1562.8101        | 781.9087        | 1544.7995       | 772.9034         | <b>T</b> | <b>349.2082</b>  | 175.1077        | 332.1816  | 166.5944         | 331.1976       | 166.1024         | 3  |
| 15 | 1663.8577        | 832.4325        | 1645.8472       | 823.4272         | <b>T</b> | 248.1605         | 124.5839        | 231.1339  | 116.0706         | 230.1499       | 115.5786         | 2  |
| 16 |                  |                 |                 |                  | <b>K</b> | 147.1128         | 74.0600         | 130.0863  | 65.5468          |                |                  | 1  |

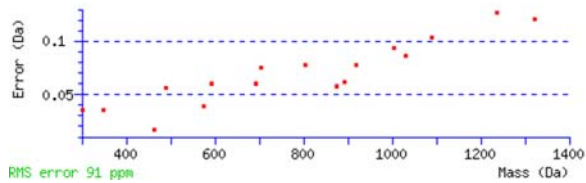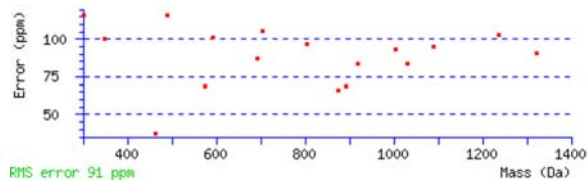

## Peptide View

MS/MS Fragmentation of **SDVWSFGILLTELVTK**

Found in [gi|6679879|ref|NP\\_032080.1](#), protein-tyrosine kinase fyn [Mus musculus]

Match to Query 676: 1807.136848 from(904.575700,2+)

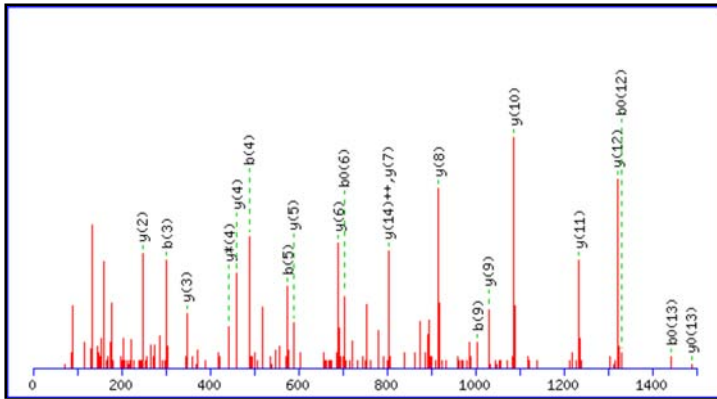

Monoisotopic mass of neutral peptide  $M_r(\text{calc})$ : 1806.9767

Ions Score: 84 Expect: 1.4e-005

Matches (Bold Red): 21/148 fragment ions using 32 most intense peaks

| #  | b                | b <sup>++</sup> | b <sup>0</sup>   | b <sup>0++</sup> | Seq.     | y                | y <sup>++</sup> | y*              | y* <sup>++</sup> | y <sup>0</sup>   | y <sup>0++</sup> | #         |
|----|------------------|-----------------|------------------|------------------|----------|------------------|-----------------|-----------------|------------------|------------------|------------------|-----------|
| 1  | 88.0393          | 44.5233         | 70.0287          | 35.5180          | <b>S</b> |                  |                 |                 |                  |                  |                  | <b>16</b> |
| 2  | 203.0662         | 102.0368        | 185.0557         | 93.0315          | <b>D</b> | 1720.9520        | 860.9796        | 1703.9254       | 852.4663         | 1702.9414        | 851.9743         | <b>15</b> |
| 3  | <b>302.1347</b>  | 151.5710        | 284.1241         | 142.5657         | <b>V</b> | 1605.9250        | <b>803.4661</b> | 1588.8985       | 794.9529         | 1587.9145        | 794.4609         | <b>14</b> |
| 4  | <b>488.2140</b>  | 244.6106        | 470.2034         | 235.6053         | <b>W</b> | 1506.8566        | 753.9319        | 1489.8301       | 745.4187         | <b>1488.8460</b> | 744.9267         | <b>13</b> |
| 5  | <b>575.2460</b>  | 288.1266        | 557.2354         | 279.1214         | <b>S</b> | <b>1320.7773</b> | 660.8923        | 1303.7508       | 652.3790         | 1302.7667        | 651.8870         | <b>12</b> |
| 6  | 722.3144         | 361.6608        | <b>704.3038</b>  | 352.6556         | <b>F</b> | <b>1233.7453</b> | 617.3763        | 1216.7187       | 608.8630         | 1215.7347        | 608.3710         | <b>11</b> |
| 7  | 779.3359         | 390.1716        | 761.3253         | 381.1663         | <b>G</b> | <b>1086.6769</b> | 543.8421        | 1069.6503       | 535.3288         | 1068.6663        | 534.8368         | <b>10</b> |
| 8  | 892.4199         | 446.7136        | 874.4094         | 437.7083         | <b>I</b> | <b>1029.6554</b> | 515.3313        | 1012.6289       | 506.8181         | 1011.6448        | 506.3261         | <b>9</b>  |
| 9  | <b>1005.5040</b> | 503.2556        | 987.4934         | 494.2503         | <b>L</b> | <b>916.5713</b>  | 458.7893        | 899.5448        | 450.2760         | 898.5608         | 449.7840         | <b>8</b>  |
| 10 | 1118.5880        | 559.7977        | 1100.5775        | 550.7924         | <b>L</b> | <b>803.4873</b>  | 402.2473        | 786.4607        | 393.7340         | 785.4767         | 393.2420         | <b>7</b>  |
| 11 | 1219.6357        | 610.3215        | 1201.6252        | 601.3162         | <b>T</b> | <b>690.4032</b>  | 345.7052        | 673.3767        | 337.1920         | 672.3927         | 336.7000         | <b>6</b>  |
| 12 | 1348.6783        | 674.8428        | <b>1330.6678</b> | 665.8375         | <b>E</b> | <b>589.3555</b>  | 295.1814        | 572.3290        | 286.6681         | 571.3450         | 286.1761         | <b>5</b>  |
| 13 | 1461.7624        | 731.3848        | <b>1443.7518</b> | 722.3795         | <b>L</b> | <b>460.3130</b>  | 230.6601        | <b>443.2864</b> | 222.1468         | 442.3024         | 221.6548         | <b>4</b>  |
| 14 | 1560.8308        | 780.9190        | 1542.8202        | 771.9137         | <b>V</b> | <b>347.2289</b>  | 174.1181        | 330.2023        | 165.6048         | 329.2183         | 165.1128         | <b>3</b>  |
| 15 | 1661.8785        | 831.4429        | 1643.8679        | 822.4376         | <b>T</b> | <b>248.1605</b>  | 124.5839        | 231.1339        | 116.0706         | 230.1499         | 115.5786         | <b>2</b>  |
| 16 |                  |                 |                  |                  | <b>K</b> | 147.1128         | 74.0600         | 130.0863        | 65.5468          |                  |                  | <b>1</b>  |

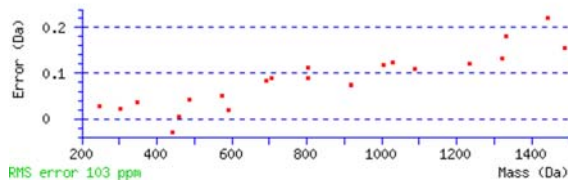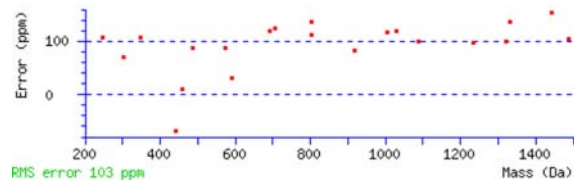

## Peptide View

MS/MS Fragmentation of **SSSLEGFHSQYK**

Found in [gi|31542871|ref|NP\\_067331.2](#), growth factor receptor bound protein 2-associated protein 1 [Mus musculus]

Match to Query 388: 1368.650448 from(685.332500,2+)

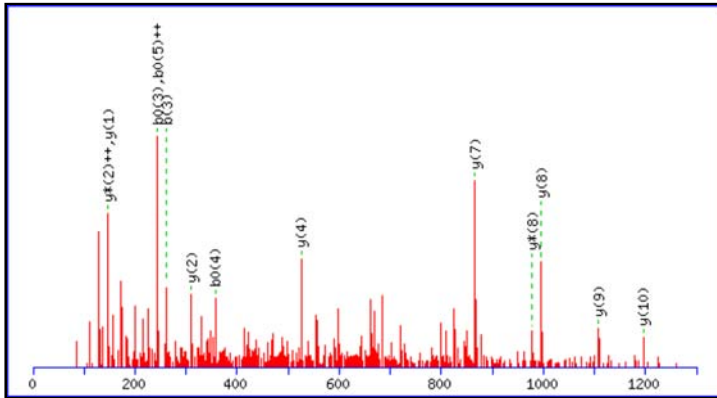

Monoisotopic mass of neutral peptide  $M_r(\text{calc})$ : 1368.6310

Ions Score: 51 Expect: 0.012

Matches (**Bold Red**): 13/108 fragment ions using 20 most intense peaks

| #  | b               | b <sup>++</sup> | b*        | b <sup>*++</sup> | b <sup>0</sup>  | b <sup>0++</sup> | Seq. | y                | y <sup>++</sup> | y*              | y <sup>*++</sup> | y <sup>0</sup> | y <sup>0++</sup> | #  |
|----|-----------------|-----------------|-----------|------------------|-----------------|------------------|------|------------------|-----------------|-----------------|------------------|----------------|------------------|----|
| 1  | 88.0393         | 44.5233         |           |                  | 70.0287         | 35.5180          | S    |                  |                 |                 |                  |                |                  | 12 |
| 2  | 175.0713        | 88.0393         |           |                  | 157.0608        | 79.0340          | S    | 1282.6062        | 641.8068        | 1265.5797       | 633.2935         | 1264.5957      | 632.8015         | 11 |
| 3  | <b>262.1034</b> | 131.5553        |           |                  | <b>244.0928</b> | 122.5500         | S    | <b>1195.5742</b> | 598.2907        | 1178.5477       | 589.7775         | 1177.5636      | 589.2855         | 10 |
| 4  | 375.1874        | 188.0974        |           |                  | <b>357.1769</b> | 179.0921         | L    | <b>1108.5422</b> | 554.7747        | 1091.5156       | 546.2614         | 1090.5316      | 545.7694         | 9  |
| 5  | 504.2300        | 252.6186        |           |                  | 486.2195        | <b>243.6134</b>  | E    | <b>995.4581</b>  | 498.2327        | <b>978.4316</b> | 489.7194         | 977.4475       | 489.2274         | 8  |
| 6  | 561.2515        | 281.1294        |           |                  | 543.2409        | 272.1241         | G    | <b>866.4155</b>  | 433.7114        | 849.3890        | 425.1981         | 848.4050       | 424.7061         | 7  |
| 7  | 708.3199        | 354.6636        |           |                  | 690.3093        | 345.6583         | F    | 809.3941         | 405.2007        | 792.3675        | 396.6874         | 791.3835       | 396.1954         | 6  |
| 8  | 845.3788        | 423.1930        |           |                  | 827.3682        | 414.1878         | H    | 662.3257         | 331.6665        | 645.2991        | 323.1532         | 644.3151       | 322.6612         | 5  |
| 9  | 932.4108        | 466.7091        |           |                  | 914.4003        | 457.7038         | S    | <b>525.2667</b>  | 263.1370        | 508.2402        | 254.6237         | 507.2562       | 254.1317         | 4  |
| 10 | 1060.4694       | 530.7383        | 1043.4429 | 522.2251         | 1042.4588       | 521.7331         | Q    | 438.2347         | 219.6210        | 421.2082        | 211.1077         |                |                  | 3  |
| 11 | 1223.5327       | 612.2700        | 1206.5062 | 603.7567         | 1205.5222       | 603.2647         | Y    | <b>310.1761</b>  | 155.5917        | 293.1496        | <b>147.0784</b>  |                |                  | 2  |
| 12 |                 |                 |           |                  |                 |                  | K    | <b>147.1128</b>  | 74.0600         | 130.0863        | 65.5468          |                |                  | 1  |

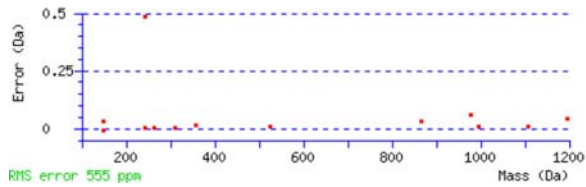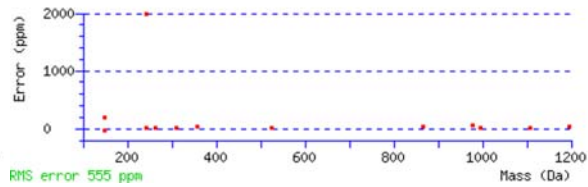



## Peptide View

MS/MS Fragmentation of **TAAFLPILSQIYADGPGEALR**

Found in [gi|6753620|ref|NP\\_034158.1](#), DEAD/H (Asp-Glu-Ala-Asp/His) box polypeptide 3, X-linked [Mus musculus]

Match to Query 812: 2315.440048 from(1158.727300,2+)

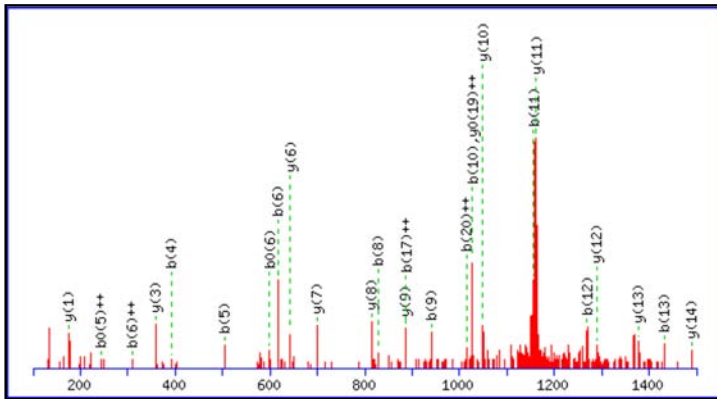

Monoisotopic mass of neutral peptide  $M_r(\text{calc})$ : 2315.2525

Ions Score: 64 Expect: 0.002

Matches (Bold Red): 26/226 fragment ions using 64 most intense peaks

| #  | b                | b <sup>++</sup>  | b*        | b* <sup>++</sup> | b <sup>0</sup>  | b <sup>0++</sup> | Seq. | y                | y <sup>++</sup> | y*        | y* <sup>++</sup> | y <sup>0</sup> | y <sup>0++</sup> | #  |
|----|------------------|------------------|-----------|------------------|-----------------|------------------|------|------------------|-----------------|-----------|------------------|----------------|------------------|----|
| 1  | 102.0550         | 51.5311          |           |                  | 84.0444         | 42.5258          | T    |                  |                 |           |                  |                |                  | 22 |
| 2  | 173.0921         | 87.0497          |           |                  | 155.0815        | 78.0444          | A    | 2215.2121        | 1108.1097       | 2198.1855 | 1099.5964        | 2197.2015      | 1099.1044        | 21 |
| 3  | 244.1292         | 122.5682         |           |                  | 226.1186        | 113.5629         | A    | 2144.1750        | 1072.5911       | 2127.1484 | 1064.0778        | 2126.1644      | 1063.5858        | 20 |
| 4  | <b>391.1976</b>  | 196.1024         |           |                  | 373.1870        | 187.0971         | F    | 2073.1379        | 1037.0726       | 2056.1113 | 1028.5593        | 2055.1273      | <b>1028.0673</b> | 19 |
| 5  | <b>504.2816</b>  | 252.6445         |           |                  | 486.2711        | <b>243.6392</b>  | L    | 1926.0694        | 963.5384        | 1909.0429 | 955.0251         | 1908.0589      | 954.5331         | 18 |
| 6  | <b>617.3657</b>  | <b>309.1865</b>  |           |                  | <b>599.3551</b> | 300.1812         | L    | 1812.9854        | 906.9963        | 1795.9588 | 898.4831         | 1794.9748      | 897.9910         | 17 |
| 7  | 714.4185         | 357.7129         |           |                  | 696.4079        | 348.7076         | P    | 1699.9013        | 850.4543        | 1682.8748 | 841.9410         | 1681.8908      | 841.4490         | 16 |
| 8  | <b>827.5025</b>  | 414.2549         |           |                  | 809.4920        | 405.2496         | I    | 1602.8486        | 801.9279        | 1585.8220 | 793.4146         | 1584.8380      | 792.9226         | 15 |
| 9  | <b>940.5866</b>  | 470.7969         |           |                  | 922.5760        | 461.7916         | L    | <b>1489.7645</b> | 745.3859        | 1472.7380 | 736.8726         | 1471.7539      | 736.3806         | 14 |
| 10 | <b>1027.6186</b> | 514.3129         |           |                  | 1009.6081       | 505.3077         | S    | <b>1376.6804</b> | 688.8439        | 1359.6539 | 680.3306         | 1358.6699      | 679.8386         | 13 |
| 11 | <b>1155.6772</b> | 578.3422         | 1138.6506 | 569.8290         | 1137.6666       | 569.3370         | Q    | <b>1289.6484</b> | 645.3278        | 1272.6219 | 636.8146         | 1271.6378      | 636.3226         | 12 |
| 12 | <b>1268.7613</b> | 634.8843         | 1251.7347 | 626.3710         | 1250.7507       | 625.8790         | I    | <b>1161.5898</b> | 581.2986        | 1144.5633 | 572.7853         | 1143.5793      | 572.2933         | 11 |
| 13 | <b>1431.8246</b> | 716.4159         | 1414.7980 | 707.9027         | 1413.8140       | 707.4106         | Y    | <b>1048.5058</b> | 524.7565        | 1031.4792 | 516.2432         | 1030.4952      | 515.7512         | 10 |
| 14 | 1502.8617        | 751.9345         | 1485.8351 | 743.4212         | 1484.8511       | 742.9292         | A    | <b>885.4424</b>  | 443.2249        | 868.4159  | 434.7116         | 867.4319       | 434.2196         | 9  |
| 15 | 1617.8886        | 809.4480         | 1600.8621 | 800.9347         | 1599.8781       | 800.4427         | D    | <b>814.4053</b>  | 407.7063        | 797.3788  | 399.1930         | 796.3948       | 398.7010         | 8  |
| 16 | 1674.9101        | 837.9587         | 1657.8835 | 829.4454         | 1656.8995       | 828.9534         | G    | <b>699.3784</b>  | 350.1928        | 682.3518  | 341.6796         | 681.3678       | 341.1876         | 7  |
| 17 | 1771.9629        | <b>886.4851</b>  | 1754.9363 | 877.9718         | 1753.9523       | 877.4798         | P    | <b>642.3569</b>  | 321.6821        | 625.3304  | 313.1688         | 624.3464       | 312.6768         | 6  |
| 18 | 1828.9843        | 914.9958         | 1811.9578 | 906.4825         | 1810.9738       | 905.9905         | G    | 545.3042         | 273.1557        | 528.2776  | 264.6424         | 527.2936       | 264.1504         | 5  |
| 19 | 1958.0269        | 979.5171         | 1941.0004 | 971.0038         | 1940.0163       | 970.5118         | E    | 488.2827         | 244.6450        | 471.2562  | 236.1317         | 470.2721       | 235.6397         | 4  |
| 20 | 2029.0640        | <b>1015.0356</b> | 2012.0375 | 1006.5224        | 2011.0535       | 1006.0304        | A    | <b>359.2401</b>  | 180.1237        | 342.2136  | 171.6104         |                |                  | 3  |
| 21 | 2142.1481        | 1071.5777        | 2125.1215 | 1063.0644        | 2124.1375       | 1062.5724        | L    | 288.2030         | 144.6051        | 271.1765  | 136.0919         |                |                  | 2  |
| 22 |                  |                  |           |                  |                 |                  | R    | <b>175.1190</b>  | 88.0631         | 158.0924  | 79.5498          |                |                  | 1  |

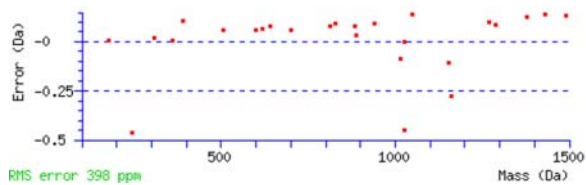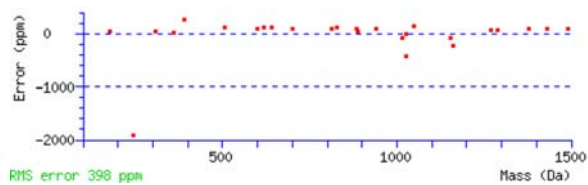

## Peptide View

### MS/MS Fragmentation of **TAIEAFNETIK**

Found in [gi|33468921|ref|NP\\_035215.1](#), phosphatidylinositol 3-kinase, regulatory subunit, polypeptide 1 isoform b [*Mus musculus*]

Match to Query 447: 1235.699248 from(618.856900,2+)

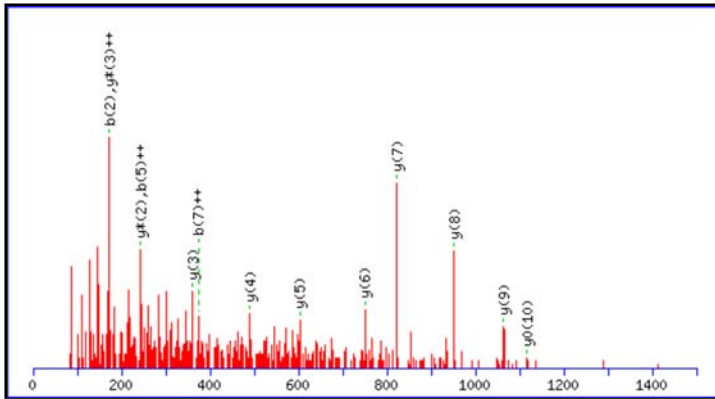

**Monoisotopic mass of neutral peptide Mr(calc): 1235.6397**

**Ions Score: 64 Expect: 0.00046**

**Matches (Bold Red): 13/104 fragment ions using 15 most intense peaks**

| #  | b               | b <sup>++</sup> | b*        | b <sup>*++</sup> | b <sup>0</sup> | b <sup>0++</sup> | Seq. | y                | y <sup>++</sup> | y*              | y <sup>*++</sup> | y <sup>0</sup>   | y <sup>0++</sup> | #  |
|----|-----------------|-----------------|-----------|------------------|----------------|------------------|------|------------------|-----------------|-----------------|------------------|------------------|------------------|----|
| 1  | 102.0550        | 51.5311         |           |                  | 84.0444        | 42.5258          | T    |                  |                 |                 |                  |                  |                  | 11 |
| 2  | <b>173.0921</b> | 87.0497         |           |                  | 155.0815       | 78.0444          | A    | 1135.5993        | 568.3033        | 1118.5728       | 559.7900         | <b>1117.5888</b> | 559.2980         | 10 |
| 3  | 286.1761        | 143.5917        |           |                  | 268.1656       | 134.5864         | I    | <b>1064.5622</b> | 532.7848        | 1047.5357       | 524.2715         | 1046.5517        | 523.7795         | 9  |
| 4  | 415.2187        | 208.1130        |           |                  | 397.2082       | 199.1077         | E    | <b>951.4782</b>  | 476.2427        | 934.4516        | 467.7294         | 933.4676         | 467.2374         | 8  |
| 5  | 486.2558        | <b>243.6316</b> |           |                  | 468.2453       | 234.6263         | A    | <b>822.4356</b>  | 411.7214        | 805.4090        | 403.2082         | 804.4250         | 402.7161         | 7  |
| 6  | 633.3242        | 317.1658        |           |                  | 615.3137       | 308.1605         | F    | <b>751.3985</b>  | 376.2029        | 734.3719        | 367.6896         | 733.3879         | 367.1976         | 6  |
| 7  | 747.3672        | <b>374.1872</b> | 730.3406  | 365.6739         | 729.3566       | 365.1819         | N    | <b>604.3301</b>  | 302.6687        | 587.3035        | 294.1554         | 586.3195         | 293.6634         | 5  |
| 8  | 876.4098        | 438.7085        | 859.3832  | 430.1952         | 858.3992       | 429.7032         | E    | <b>490.2871</b>  | 245.6472        | 473.2606        | 237.1339         | 472.2766         | 236.6419         | 4  |
| 9  | 977.4574        | 489.2324        | 960.4309  | 480.7191         | 959.4469       | 480.2271         | T    | <b>361.2445</b>  | 181.1259        | 344.2180        | <b>172.6126</b>  | 343.2340         | 172.1206         | 3  |
| 10 | 1090.5415       | 545.7744        | 1073.5149 | 537.2611         | 1072.5309      | 536.7691         | I    | 260.1969         | 130.6021        | <b>243.1703</b> | 122.0888         |                  |                  | 2  |
| 11 |                 |                 |           |                  |                |                  | K    | 147.1128         | 74.0600         | 130.0863        | 65.5468          |                  |                  | 1  |

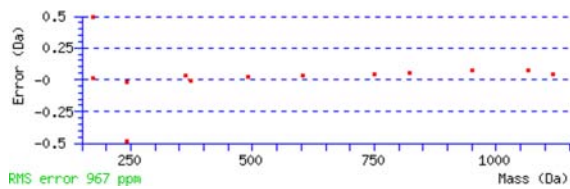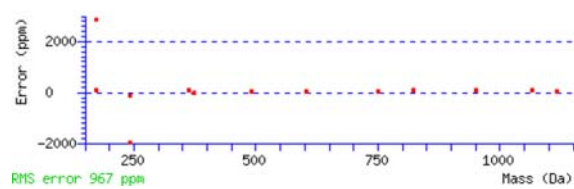

## Peptide View

MS/MS Fragmentation of **TEFLSFMNTELAFTK**

Found in [gi|21886811|ref|NP\\_058020.1](#), S100 calcium binding protein A11 (calizzarin) [Mus musculus]

Match to Query 605: 1848.976448 from(925.495500,2+)

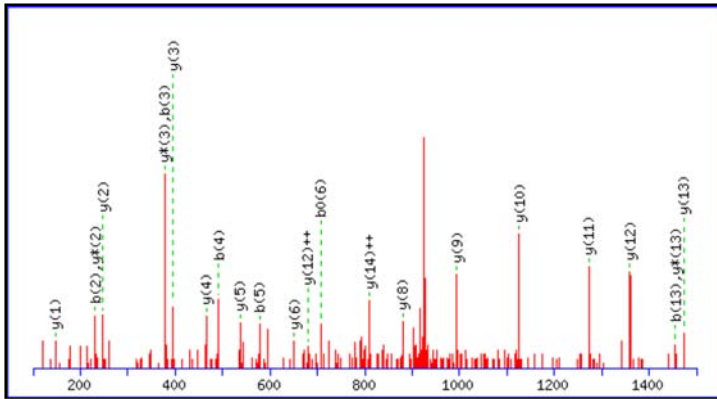

Monoisotopic mass of neutral peptide Mr(calc): 1848.8967

Ions Score: 74 Expect: 0.00012

Matches (**Bold Red**): 23/164 fragment ions using 45 most intense peaks

| #  | b                | b <sup>++</sup> | b*        | b* <sup>++</sup> | b <sup>0</sup>  | b <sup>0++</sup> | Seq. | y                | y <sup>++</sup> | y*               | y* <sup>++</sup> | y <sup>0</sup> | y <sup>0++</sup> | #  |
|----|------------------|-----------------|-----------|------------------|-----------------|------------------|------|------------------|-----------------|------------------|------------------|----------------|------------------|----|
| 1  | 102.0550         | 51.5311         |           |                  | 84.0444         | 42.5258          | T    |                  |                 |                  |                  |                |                  | 16 |
| 2  | <b>231.0975</b>  | 116.0524        |           |                  | 213.0870        | 107.0471         | E    | 1748.8564        | 874.9318        | 1731.8298        | 866.4185         | 1730.8458      | 865.9265         | 15 |
| 3  | <b>378.1660</b>  | 189.5866        |           |                  | 360.1554        | 180.5813         | F    | 1619.8138        | <b>810.4105</b> | 1602.7872        | 801.8972         | 1601.8032      | 801.4052         | 14 |
| 4  | <b>491.2500</b>  | 246.1286        |           |                  | 473.2395        | 237.1234         | L    | <b>1472.7454</b> | 736.8763        | <b>1455.7188</b> | 728.3630         | 1454.7348      | 727.8710         | 13 |
| 5  | <b>578.2820</b>  | 289.6447        |           |                  | 560.2715        | 280.6394         | S    | <b>1359.6613</b> | <b>680.3343</b> | 1342.6347        | 671.8210         | 1341.6507      | 671.3290         | 12 |
| 6  | 725.3505         | 363.1789        |           |                  | <b>707.3399</b> | 354.1736         | F    | <b>1272.6293</b> | 636.8183        | 1255.6027        | 628.3050         | 1254.6187      | 627.8130         | 11 |
| 7  | 856.3909         | 428.6991        |           |                  | 838.3804        | 419.6938         | M    | <b>1125.5609</b> | 563.2841        | 1108.5343        | 554.7708         | 1107.5503      | 554.2788         | 10 |
| 8  | 970.4339         | 485.7206        | 953.4073  | 477.2073         | 952.4233        | 476.7153         | N    | <b>994.5204</b>  | 497.7638        | 977.4938         | 489.2505         | 976.5098       | 488.7585         | 9  |
| 9  | 1071.4815        | 536.2444        | 1054.4550 | 527.7311         | 1053.4710       | 527.2391         | T    | <b>880.4774</b>  | 440.7424        | 863.4509         | 432.2291         | 862.4669       | 431.7371         | 8  |
| 10 | 1200.5241        | 600.7657        | 1183.4976 | 592.2524         | 1182.5136       | 591.7604         | E    | 779.4298         | 390.2185        | 762.4032         | 381.7052         | 761.4192       | 381.2132         | 7  |
| 11 | 1313.6082        | 657.3077        | 1296.5816 | 648.7945         | 1295.5976       | 648.3025         | L    | <b>650.3872</b>  | 325.6972        | 633.3606         | 317.1839         | 632.3766       | 316.6919         | 6  |
| 12 | 1384.6453        | 692.8263        | 1367.6188 | 684.3130         | 1366.6347       | 683.8210         | A    | <b>537.3031</b>  | 269.1552        | 520.2766         | 260.6419         | 519.2925       | 260.1499         | 5  |
| 13 | <b>1455.6824</b> | 728.3448        | 1438.6559 | 719.8316         | 1437.6719       | 719.3396         | A    | <b>466.2660</b>  | 233.6366        | 449.2395         | 225.1234         | 448.2554       | 224.6314         | 4  |
| 14 | 1602.7508        | 801.8791        | 1585.7243 | 793.3658         | 1584.7403       | 792.8738         | F    | <b>395.2289</b>  | 198.1181        | <b>378.2023</b>  | 189.6048         | 377.2183       | 189.1128         | 3  |
| 15 | 1703.7985        | 852.4029        | 1686.7720 | 843.8896         | 1685.7879       | 843.3976         | T    | <b>248.1605</b>  | 124.5839        | <b>231.1339</b>  | 116.0706         | 230.1499       | 115.5786         | 2  |
| 16 |                  |                 |           |                  |                 |                  | K    | <b>147.1128</b>  | 74.0600         | 130.0863         | 65.5468          |                |                  | 1  |

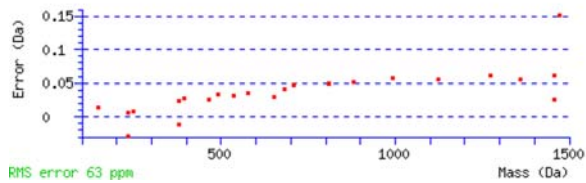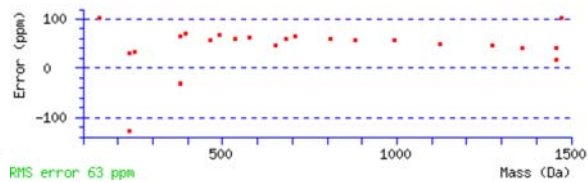

## Peptide View

MS/MS Fragmentation of **TGTFIVIDLIDIIR**

Found in [gi|6755228|ref|NP\\_035332.1](#), protein tyrosine phosphatase, non-receptor type 11 [Mus musculus]

Match to Query 561: 1701.081648 from(851.548100,2+)

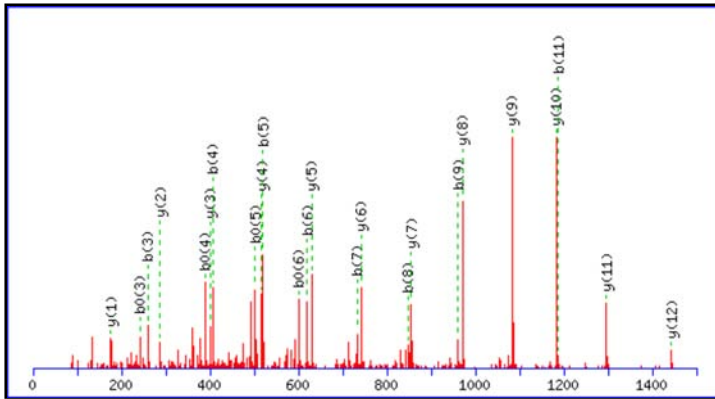

Monoisotopic mass of neutral peptide  $M_r(\text{calc})$ : 1701.0076

Ions Score: 85 Expect: 1.2e-005

Matches (Bold Red): 24/134 fragment ions using 44 most intense peaks

| #  | b                | b <sup>++</sup> | b <sup>0</sup>  | b <sup>0++</sup> | Seq. | y                | y <sup>++</sup> | y*        | y* <sup>++</sup> | y <sup>0</sup> | y <sup>0++</sup> | #  |
|----|------------------|-----------------|-----------------|------------------|------|------------------|-----------------|-----------|------------------|----------------|------------------|----|
| 1  | 102.0550         | 51.5311         | 84.0444         | 42.5258          | T    |                  |                 |           |                  |                |                  | 15 |
| 2  | 159.0764         | 80.0418         | 141.0659        | 71.0366          | G    | 1600.9672        | 800.9872        | 1583.9407 | 792.4740         | 1582.9566      | 791.9820         | 14 |
| 3  | <b>260.1241</b>  | 130.5657        | <b>242.1135</b> | 121.5604         | T    | 1543.9458        | 772.4765        | 1526.9192 | 763.9632         | 1525.9352      | 763.4712         | 13 |
| 4  | <b>407.1925</b>  | 204.0999        | <b>389.1819</b> | 195.0946         | F    | <b>1442.8981</b> | 721.9527        | 1425.8715 | 713.4394         | 1424.8875      | 712.9474         | 12 |
| 5  | <b>520.2766</b>  | 260.6419        | <b>502.2660</b> | 251.6366         | I    | <b>1295.8297</b> | 648.4185        | 1278.8031 | 639.9052         | 1277.8191      | 639.4132         | 11 |
| 6  | <b>619.3450</b>  | 310.1761        | <b>601.3344</b> | 301.1708         | V    | <b>1182.7456</b> | 591.8764        | 1165.7191 | 583.3632         | 1164.7350      | 582.8712         | 10 |
| 7  | <b>732.4290</b>  | 366.7182        | 714.4185        | 357.7129         | I    | <b>1083.6772</b> | 542.3422        | 1066.6506 | 533.8290         | 1065.6666      | 533.3370         | 9  |
| 8  | <b>847.4560</b>  | 424.2316        | 829.4454        | 415.2263         | D    | <b>970.5931</b>  | 485.8002        | 953.5666  | 477.2869         | 952.5826       | 476.7949         | 8  |
| 9  | <b>960.5400</b>  | 480.7737        | 942.5295        | 471.7684         | I    | <b>855.5662</b>  | 428.2867        | 838.5396  | 419.7735         | 837.5556       | 419.2815         | 7  |
| 10 | 1073.6241        | 537.3157        | 1055.6135       | 528.3104         | L    | <b>742.4821</b>  | 371.7447        | 725.4556  | 363.2314         | 724.4716       | 362.7394         | 6  |
| 11 | <b>1186.7082</b> | 593.8577        | 1168.6976       | 584.8524         | I    | <b>629.3981</b>  | 315.2027        | 612.3715  | 306.6894         | 611.3875       | 306.1974         | 5  |
| 12 | 1301.7351        | 651.3712        | 1283.7245       | 642.3659         | D    | <b>516.3140</b>  | 258.6606        | 499.2875  | 250.1474         | 498.3034       | 249.6554         | 4  |
| 13 | 1414.8192        | 707.9132        | 1396.8086       | 698.9079         | I    | <b>401.2871</b>  | 201.1472        | 384.2605  | 192.6339         |                |                  | 3  |
| 14 | 1527.9032        | 764.4552        | 1509.8927       | 755.4500         | I    | <b>288.2030</b>  | 144.6051        | 271.1765  | 136.0919         |                |                  | 2  |
| 15 |                  |                 |                 |                  | R    | <b>175.1190</b>  | 88.0631         | 158.0924  | 79.5498          |                |                  | 1  |

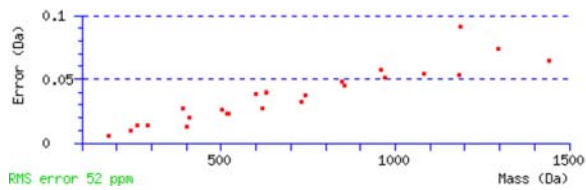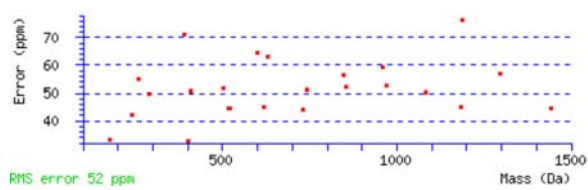

## Peptide View

MS/MS Fragmentation of **TITELADWLVLIDQMLK**

Found in [gi|46575908|ref|NP\\_035812.2](#), utrophin [Mus musculus]

Match to Query 658: 2001.117448 from(1001.566000,2+)

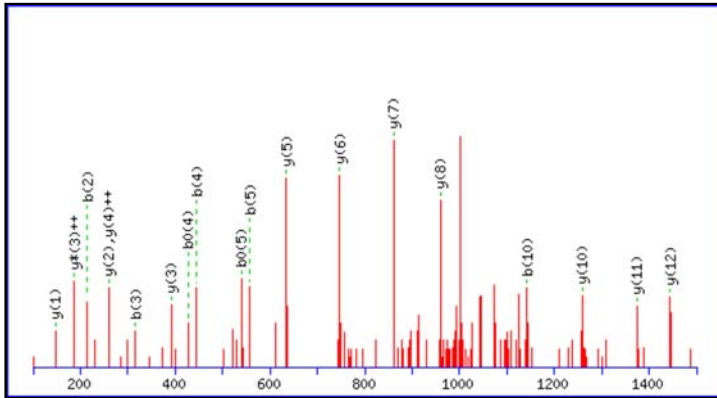

Monoisotopic mass of neutral peptide  $M_r(\text{calc})$ : 2001.0856

Ions Score: 67 Expect: 0.00083

Matches (**Bold Red**): 19/158 fragment ions using 28 most intense peaks

| #  | b                | b <sup>++</sup> | b*        | b <sup>*++</sup> | b <sup>0</sup>  | b <sup>0++</sup> | Seq. | y                | y <sup>++</sup> | y*        | y <sup>*++</sup> | y <sup>0</sup> | y <sup>0++</sup> | #  |
|----|------------------|-----------------|-----------|------------------|-----------------|------------------|------|------------------|-----------------|-----------|------------------|----------------|------------------|----|
| 1  | 102.0550         | 51.5311         |           |                  | 84.0444         | 42.5258          | T    |                  |                 |           |                  |                |                  | 17 |
| 2  | <b>215.1390</b>  | 108.0731        |           |                  | 197.1285        | 99.0679          | I    | 1901.0452        | 951.0262        | 1884.0187 | 942.5130         | 1883.0346      | 942.0210         | 16 |
| 3  | <b>316.1867</b>  | 158.5970        |           |                  | 298.1761        | 149.5917         | T    | 1787.9611        | 894.4842        | 1770.9346 | 885.9709         | 1769.9506      | 885.4789         | 15 |
| 4  | <b>445.2293</b>  | 223.1183        |           |                  | <b>427.2187</b> | 214.1130         | E    | 1686.9135        | 843.9604        | 1669.8869 | 835.4471         | 1668.9029      | 834.9551         | 14 |
| 5  | <b>558.3133</b>  | 279.6603        |           |                  | <b>540.3028</b> | 270.6550         | L    | 1557.8709        | 779.4391        | 1540.8443 | 770.9258         | 1539.8603      | 770.4338         | 13 |
| 6  | 629.3505         | 315.1789        |           |                  | 611.3399        | 306.1736         | A    | <b>1444.7868</b> | 722.8970        | 1427.7603 | 714.3838         | 1426.7762      | 713.8918         | 12 |
| 7  | 744.3774         | 372.6923        |           |                  | 726.3668        | 363.6871         | D    | <b>1373.7497</b> | 687.3785        | 1356.7232 | 678.8652         | 1355.7391      | 678.3732         | 11 |
| 8  | 930.4567         | 465.7320        |           |                  | 912.4461        | 456.7267         | W    | <b>1258.7228</b> | 629.8650        | 1241.6962 | 621.3517         | 1240.7122      | 620.8597         | 10 |
| 9  | 1043.5408        | 522.2740        |           |                  | 1025.5302       | 513.2687         | L    | 1072.6435        | 536.8254        | 1055.6169 | 528.3121         | 1054.6329      | 527.8201         | 9  |
| 10 | <b>1142.6092</b> | 571.8082        |           |                  | 1124.5986       | 562.8029         | V    | <b>959.5594</b>  | 480.2833        | 942.5328  | 471.7701         | 941.5488       | 471.2781         | 8  |
| 11 | 1255.6932        | 628.3503        |           |                  | 1237.6827       | 619.3450         | L    | <b>860.4910</b>  | 430.7491        | 843.4644  | 422.2359         | 842.4804       | 421.7438         | 7  |
| 12 | 1368.7773        | 684.8923        |           |                  | 1350.7667       | 675.8870         | I    | <b>747.4069</b>  | 374.2071        | 730.3804  | 365.6938         | 729.3964       | 365.2018         | 6  |
| 13 | 1483.8042        | 742.4058        |           |                  | 1465.7937       | 733.4005         | D    | <b>634.3229</b>  | 317.6651        | 617.2963  | 309.1518         | 616.3123       | 308.6598         | 5  |
| 14 | 1611.8628        | 806.4350        | 1594.8363 | 797.9218         | 1593.8523       | 797.4298         | Q    | 519.2959         | <b>260.1516</b> | 502.2694  | 251.6383         |                |                  | 4  |
| 15 | 1742.9033        | 871.9553        | 1725.8767 | 863.4420         | 1724.8927       | 862.9500         | M    | <b>391.2373</b>  | 196.1223        | 374.2108  | <b>187.6090</b>  |                |                  | 3  |
| 16 | 1855.9874        | 928.4973        | 1838.9608 | 919.9840         | 1837.9768       | 919.4920         | L    | <b>260.1969</b>  | 130.6021        | 243.1703  | 122.0888         |                |                  | 2  |
| 17 |                  |                 |           |                  |                 |                  | K    | <b>147.1128</b>  | 74.0600         | 130.0863  | 65.5468          |                |                  | 1  |

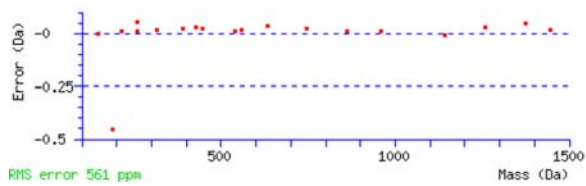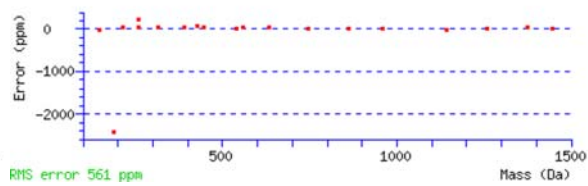

## Peptide View

MS/MS Fragmentation of **TLGSGAFGQVVEATAHGLSHSQATMK**

Found in [gi|6679259|ref|NP\\_032835.1](#), platelet derived growth factor receptor, beta polypeptide [Mus musculus]

Match to Query 769: 2584.262472 from(862.428100,3+)

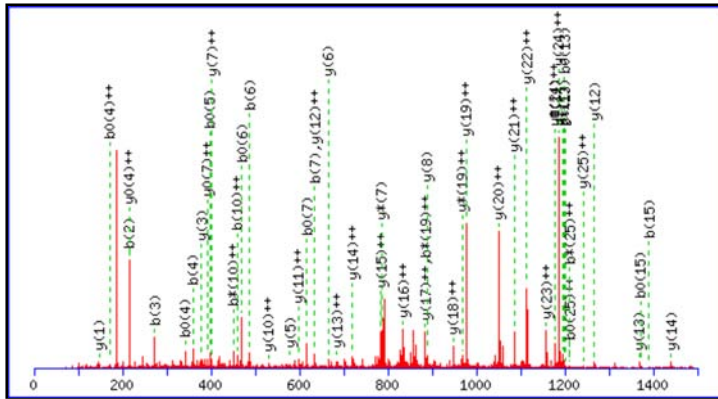

Monoisotopic mass of neutral peptide  $M_r(\text{calc})$ : 2584.2703

Ions Score: 57 Expect: 0.016

Matches (**Bold Red**): 52/280 fragment ions using 171 most intense peaks

| #  | b                | b <sup>++</sup> | b*               | b* <sup>++</sup> | b <sup>0</sup>   | b <sup>0++</sup> | Seq. | y                | y <sup>++</sup>  | y*              | y* <sup>++</sup> | y <sup>0</sup>   | y <sup>0++</sup> | #  |
|----|------------------|-----------------|------------------|------------------|------------------|------------------|------|------------------|------------------|-----------------|------------------|------------------|------------------|----|
| 1  | 102.0550         | 51.5311         |                  |                  | 84.0444          | 42.5258          | T    |                  |                  |                 |                  |                  |                  | 26 |
| 2  | <b>215.1390</b>  | 108.0731        |                  |                  | 197.1285         | 99.0679          | L    | 2484.2299        | <b>1242.6186</b> | 2467.2034       | 1234.1053        | 2466.2194        | 1233.6133        | 25 |
| 3  | <b>272.1605</b>  | 136.5839        |                  |                  | 254.1499         | 127.5786         | G    | 2371.1459        | <b>1186.0766</b> | 2354.1193       | <b>1177.5633</b> | 2353.1353        | <b>1177.0713</b> | 24 |
| 4  | <b>359.1925</b>  | 180.0999        |                  |                  | <b>341.1819</b>  | <b>171.0946</b>  | S    | 2314.1244        | <b>1157.5658</b> | 2297.0979       | 1149.0526        | 2296.1138        | 1148.5606        | 23 |
| 5  | 416.2140         | 208.6106        |                  |                  | <b>398.2034</b>  | 199.6053         | G    | 2227.0924        | <b>1114.0498</b> | 2210.0658       | 1105.5366        | 2209.0818        | 1105.0445        | 22 |
| 6  | <b>487.2511</b>  | 244.1292        |                  |                  | <b>469.2405</b>  | 235.1239         | A    | 2170.0709        | <b>1085.5391</b> | 2153.0444       | 1077.0258        | 2152.0604        | 1076.5338        | 21 |
| 7  | <b>634.3195</b>  | 317.6634        |                  |                  | <b>616.3089</b>  | 308.6581         | F    | 2099.0338        | <b>1050.0205</b> | 2082.0073       | 1041.5073        | 2081.0232        | 1041.0153        | 20 |
| 8  | 691.3409         | 346.1741        |                  |                  | 673.3304         | 337.1688         | G    | 1951.9654        | <b>976.4863</b>  | 1934.9389       | <b>967.9731</b>  | 1933.9548        | 967.4811         | 19 |
| 9  | 819.3995         | 410.2034        | 802.3730         | 401.6901         | 801.3890         | 401.1981         | Q    | 1894.9439        | <b>947.9756</b>  | 1877.9174       | 939.4623         | 1876.9334        | 938.9703         | 18 |
| 10 | 918.4679         | <b>459.7376</b> | 901.4414         | <b>451.2243</b>  | 900.4574         | 450.7323         | V    | 1766.8854        | <b>883.9463</b>  | 1749.8588       | 875.4330         | 1748.8748        | 874.9410         | 17 |
| 11 | 1017.5363        | 509.2718        | 1000.5098        | 500.7585         | 999.5258         | 500.2665         | V    | 1667.8170        | <b>834.4121</b>  | 1650.7904       | 825.8988         | 1649.8064        | 825.4068         | 16 |
| 12 | 1146.5789        | 573.7931        | 1129.5524        | 565.2798         | 1128.5684        | 564.7878         | E    | 1568.7485        | <b>784.8779</b>  | 1551.7220       | 776.3646         | 1550.7380        | 775.8726         | 15 |
| 13 | 1217.6160        | 609.3117        | <b>1200.5895</b> | 600.7984         | <b>1199.6055</b> | 600.3064         | A    | <b>1439.7060</b> | <b>720.3566</b>  | 1422.6794       | 711.8433         | 1421.6954        | 711.3513         | 14 |
| 14 | 1318.6637        | 659.8355        | 1301.6372        | 651.3222         | 1300.6532        | 650.8302         | T    | <b>1368.6688</b> | <b>684.8381</b>  | 1351.6423       | 676.3248         | 1350.6583        | 675.8328         | 13 |
| 15 | <b>1389.7008</b> | 695.3541        | 1372.6743        | 686.8408         | <b>1371.6903</b> | 686.3488         | A    | <b>1267.6212</b> | <b>634.3142</b>  | 1250.5946       | 625.8009         | 1249.6106        | 625.3089         | 12 |
| 16 | 1526.7597        | 763.8835        | 1509.7332        | 755.3702         | 1508.7492        | 754.8782         | H    | <b>1196.5841</b> | <b>598.7957</b>  | 1179.5575       | 590.2824         | <b>1178.5735</b> | 589.7904         | 11 |
| 17 | 1583.7812        | 792.3942        | 1566.7547        | 783.8810         | 1565.7706        | 783.3890         | G    | 1059.5251        | <b>530.2662</b>  | 1042.4986       | 521.7529         | 1041.5146        | 521.2609         | 10 |
| 18 | 1696.8653        | 848.9363        | 1679.8387        | 840.4230         | 1678.8547        | 839.9310         | L    | 1002.5037        | 501.7555         | 985.4771        | 493.2422         | 984.4931         | 492.7502         | 9  |
| 19 | 1783.8973        | 892.4523        | 1766.8707        | <b>883.9390</b>  | 1765.8867        | 883.4470         | S    | <b>889.4196</b>  | 445.2134         | 872.3931        | 436.7002         | 871.4091         | 436.2082         | 8  |
| 20 | 1920.9562        | 960.9817        | 1903.9297        | 952.4685         | 1902.9456        | 951.9765         | H    | 802.3876         | <b>401.6974</b>  | <b>785.3610</b> | 393.1842         | 784.3770         | <b>392.6922</b>  | 7  |
| 21 | 2007.9882        | 1004.4978       | 1990.9617        | 995.9845         | 1989.9777        | 995.4925         | S    | <b>665.3287</b>  | 333.1680         | 648.3021        | 324.6547         | 647.3181         | 324.1627         | 6  |
| 22 | 2136.0468        | 1068.5270       | 2119.0203        | 1060.0138        | 2118.0363        | 1059.5218        | Q    | <b>578.2967</b>  | 289.6520         | 561.2701        | 281.1387         | 560.2861         | 280.6467         | 5  |
| 23 | 2207.0839        | 1104.0456       | 2190.0574        | 1095.5323        | 2189.0734        | 1095.0403        | A    | 450.2381         | 225.6227         | 433.2115        | 217.1094         | 432.2275         | <b>216.6174</b>  | 4  |
| 24 | 2308.1316        | 1154.5694       | 2291.1051        | 1146.0562        | 2290.1210        | 1145.5642        | T    | <b>379.2010</b>  | 190.1041         | 362.1744        | 181.5908         | 361.1904         | 181.0988         | 3  |
| 25 | 2439.1721        | 1220.0897       | 2422.1455        | <b>1211.5764</b> | 2421.1615        | <b>1211.0844</b> | M    | 278.1533         | 139.5803         | 261.1267        | 131.0670         |                  |                  | 2  |
| 26 |                  |                 |                  |                  |                  |                  | K    | <b>147.1128</b>  | 74.0600          | 130.0863        | 65.5468          |                  |                  | 1  |

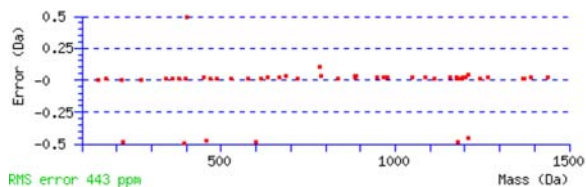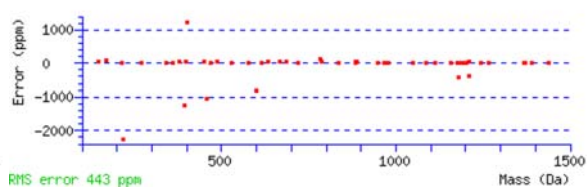



## Peptide View

MS/MS Fragmentation of **TLVTQNSGV EALIHAILR**

Found in [gi|28395018|ref|NP\\_034723.1|](#), junction plakoglobin [Mus musculus]

Match to Query 1073: 1940.228472 from(647.750100,3+)

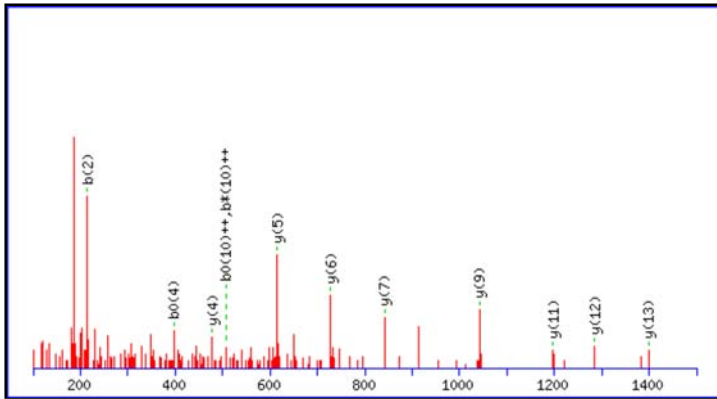

Monoisotopic mass of neutral peptide  $M_r(\text{calc})$ : 1940.1150

Variable modifications:

R18 : Arginine-1306 (R-1306)

Ions Score: 53 Expect: 0.02

Matches (**Bold Red**): 12/180 fragment ions using 16 most intense peaks

| #  | b               | b <sup>++</sup> | b*        | b* <sup>++</sup> | b <sup>0</sup>  | b <sup>0++</sup> | Seq. | y                | y <sup>++</sup> | y*        | y* <sup>++</sup> | y <sup>0</sup> | y <sup>0++</sup> | #  |
|----|-----------------|-----------------|-----------|------------------|-----------------|------------------|------|------------------|-----------------|-----------|------------------|----------------|------------------|----|
| 1  | 102.0550        | 51.5311         |           |                  | 84.0444         | 42.5258          | T    |                  |                 |           |                  |                |                  | 18 |
| 2  | <b>215.1390</b> | 108.0731        |           |                  | 197.1285        | 99.0679          | L    | 1840.0746        | 920.5409        | 1823.0480 | 912.0277         | 1822.0640      | 911.5357         | 17 |
| 3  | 314.2074        | 157.6074        |           |                  | 296.1969        | 148.6021         | V    | 1726.9905        | 863.9989        | 1709.9640 | 855.4856         | 1708.9800      | 854.9936         | 16 |
| 4  | 415.2551        | 208.1312        |           |                  | <b>397.2445</b> | 199.1259         | T    | 1627.9221        | 814.4647        | 1610.8956 | 805.9514         | 1609.9116      | 805.4594         | 15 |
| 5  | 543.3137        | 272.1605        | 526.2871  | 263.6472         | 525.3031        | 263.1552         | Q    | 1526.8744        | 763.9409        | 1509.8479 | 755.4276         | 1508.8639      | 754.9356         | 14 |
| 6  | 657.3566        | 329.1819        | 640.3301  | 320.6687         | 639.3461        | 320.1767         | N    | <b>1398.8159</b> | 699.9116        | 1381.7893 | 691.3983         | 1380.8053      | 690.9063         | 13 |
| 7  | 744.3886        | 372.6980        | 727.3621  | 364.1847         | 726.3781        | 363.6927         | S    | <b>1284.7729</b> | 642.8901        | 1267.7464 | 634.3768         | 1266.7624      | 633.8848         | 12 |
| 8  | 801.4101        | 401.2087        | 784.3836  | 392.6954         | 783.3995        | 392.2034         | G    | <b>1197.7409</b> | 599.3741        | 1180.7144 | 590.8608         | 1179.7303      | 590.3688         | 11 |
| 9  | 900.4785        | 450.7429        | 883.4520  | 442.2296         | 882.4680        | 441.7376         | V    | 1140.7194        | 570.8634        | 1123.6929 | 562.3501         | 1122.7089      | 561.8581         | 10 |
| 10 | 1029.5211       | 515.2642        | 1012.4946 | <b>506.7509</b>  | 1011.5105       | <b>506.2589</b>  | E    | <b>1041.6510</b> | 521.3292        | 1024.6245 | 512.8159         | 1023.6405      | 512.3239         | 9  |
| 11 | 1100.5582       | 550.7827        | 1083.5317 | 542.2695         | 1082.5477       | 541.7775         | A    | 912.6084         | 456.8079        | 895.5819  | 448.2946         |                |                  | 8  |
| 12 | 1213.6423       | 607.3248        | 1196.6157 | 598.8115         | 1195.6317       | 598.3195         | L    | <b>841.5713</b>  | 421.2893        | 824.5448  | 412.7760         |                |                  | 7  |
| 13 | 1326.7263       | 663.8668        | 1309.6998 | 655.3535         | 1308.7158       | 654.8615         | I    | <b>728.4873</b>  | 364.7473        | 711.4607  | 356.2340         |                |                  | 6  |
| 14 | 1463.7852       | 732.3963        | 1446.7587 | 723.8830         | 1445.7747       | 723.3910         | H    | <b>615.4032</b>  | 308.2052        | 598.3767  | 299.6920         |                |                  | 5  |
| 15 | 1534.8224       | 767.9148        | 1517.7958 | 759.4015         | 1516.8118       | 758.9095         | A    | <b>478.3443</b>  | 239.6758        | 461.3178  | 231.1625         |                |                  | 4  |
| 16 | 1647.9064       | 824.4568        | 1630.8799 | 815.9436         | 1629.8959       | 815.4516         | I    | 407.3072         | 204.1572        | 390.2806  | 195.6440         |                |                  | 3  |
| 17 | 1760.9905       | 880.9989        | 1743.9639 | 872.4856         | 1742.9799       | 871.9936         | L    | 294.2231         | 147.6152        | 277.1966  | 139.1019         |                |                  | 2  |
| 18 |                 |                 |           |                  |                 |                  | R    | 181.1391         | 91.0732         | 164.1125  | 82.5599          |                |                  | 1  |

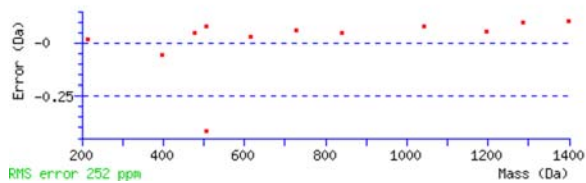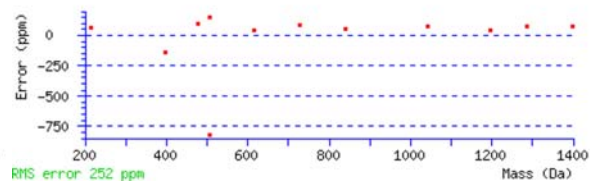

## Peptide View

MS/MS Fragmentation of **TPFSLVGNVFELNFK**

Found in [gi|34996495|ref|NP\\_062616.2](#), ribophorin II [Mus musculus]

Match to Query 408: 1710.992248 from(856.503400,2+)

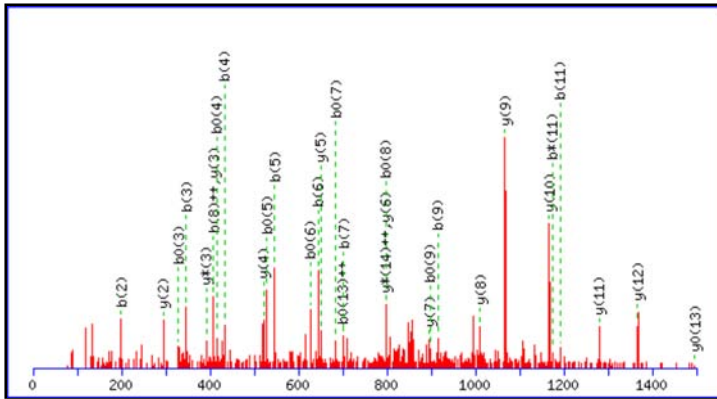

Monoisotopic mass of neutral peptide  $M_r(\text{calc})$ : 1710.8980

Ions Score: 52 Expect: 0.019

Matches (**Bold Red**): 32/146 fragment ions using 79 most intense peaks

| #  | b                | b <sup>++</sup> | b*               | b <sup>*++</sup> | b <sup>0</sup>  | b <sup>0++</sup> | Seq. | y                | y <sup>++</sup> | y*              | y <sup>*++</sup> | y <sup>0</sup>   | y <sup>0++</sup> | #  |
|----|------------------|-----------------|------------------|------------------|-----------------|------------------|------|------------------|-----------------|-----------------|------------------|------------------|------------------|----|
| 1  | 102.0550         | 51.5311         |                  |                  | 84.0444         | 42.5258          | T    |                  |                 |                 |                  |                  |                  | 15 |
| 2  | <b>199.1077</b>  | 100.0575        |                  |                  | 181.0972        | 91.0522          | P    | 1610.8577        | 805.9325        | 1593.8311       | <b>797.4192</b>  | 1592.8471        | 796.9272         | 14 |
| 3  | <b>346.1761</b>  | 173.5917        |                  |                  | <b>328.1656</b> | 164.5864         | F    | 1513.8049        | 757.4061        | 1496.7784       | 748.8928         | <b>1495.7943</b> | 748.4008         | 13 |
| 4  | <b>433.2082</b>  | 217.1077        |                  |                  | <b>415.1976</b> | 208.1024         | S    | <b>1366.7365</b> | 683.8719        | 1349.7100       | 675.3586         | 1348.7259        | 674.8666         | 12 |
| 5  | <b>546.2922</b>  | 273.6497        |                  |                  | <b>528.2817</b> | 264.6445         | L    | <b>1279.7045</b> | 640.3559        | 1262.6779       | 631.8426         | 1261.6939        | 631.3506         | 11 |
| 6  | <b>645.3606</b>  | 323.1840        |                  |                  | <b>627.3501</b> | 314.1787         | V    | <b>1166.6204</b> | 583.8138        | 1149.5939       | 575.3006         | 1148.6098        | 574.8086         | 10 |
| 7  | <b>702.3821</b>  | 351.6947        |                  |                  | <b>684.3715</b> | 342.6894         | G    | <b>1067.5520</b> | 534.2796        | 1050.5255       | 525.7664         | 1049.5414        | 525.2744         | 9  |
| 8  | 816.4250         | <b>408.7161</b> | 799.3985         | 400.2029         | <b>798.4145</b> | 399.7109         | N    | <b>1010.5305</b> | 505.7689        | 993.5040        | 497.2556         | 992.5200         | 496.7636         | 8  |
| 9  | <b>915.4934</b>  | 458.2504        | 898.4669         | 449.7371         | <b>897.4829</b> | 449.2451         | V    | <b>896.4876</b>  | 448.7474        | 879.4611        | 440.2342         | 878.4770         | 439.7422         | 7  |
| 10 | 1062.5618        | 531.7846        | 1045.5353        | 523.2713         | 1044.5513       | 522.7793         | F    | <b>797.4192</b>  | 399.2132        | 780.3927        | 390.7000         | 779.4086         | 390.2080         | 6  |
| 11 | <b>1191.6044</b> | 596.3059        | <b>1174.5779</b> | 587.7926         | 1173.5939       | 587.3006         | E    | <b>650.3508</b>  | 325.6790        | 633.3242        | 317.1658         | 632.3402         | 316.6738         | 5  |
| 12 | 1304.6885        | 652.8479        | 1287.6619        | 644.3346         | 1286.6779       | 643.8426         | L    | <b>521.3082</b>  | 261.1577        | 504.2817        | 252.6445         |                  |                  | 4  |
| 13 | 1418.7314        | 709.8693        | 1401.7049        | 701.3561         | 1400.7209       | <b>700.8641</b>  | N    | <b>408.2241</b>  | 204.6157        | <b>391.1976</b> | 196.1024         |                  |                  | 3  |
| 14 | 1565.7998        | 783.4036        | 1548.7733        | 774.8903         | 1547.7893       | 774.3983         | F    | <b>294.1812</b>  | 147.5942        | 277.1547        | 139.0810         |                  |                  | 2  |
| 15 |                  |                 |                  |                  |                 |                  | K    | 147.1128         | 74.0600         | 130.0863        | 65.5468          |                  |                  | 1  |

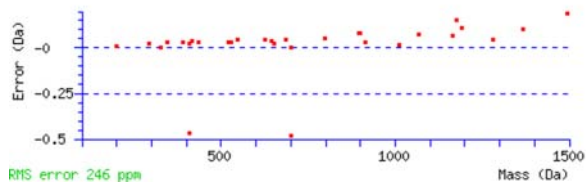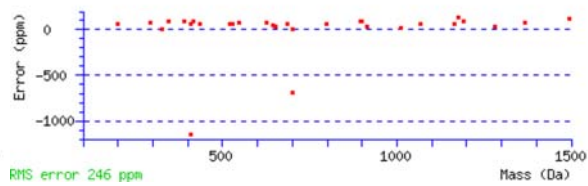

## Peptide View

MS/MS Fragmentation of **TTFQNLIQFEALLK**

Found in [gi|22164788|ref|NP\\_666257.1](#), Janus kinase 1 [Mus musculus]

Match to Query 584: 1722.954048 from(862.484300,2+)

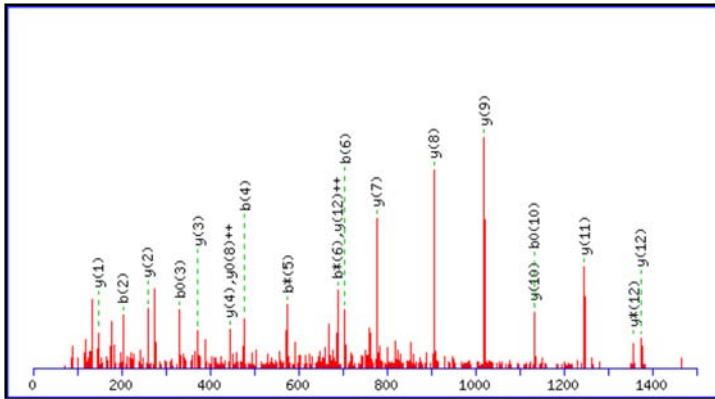

Monoisotopic mass of neutral peptide Mr(calc): 1722.9192

Ions Score: 72 Expect: 0.00018

Matches (Bold Red): 20/154 fragment ions using 29 most intense peaks

| #  | b               | b <sup>++</sup> | b*              | b* <sup>++</sup> | b <sup>0</sup>   | b <sup>0++</sup> | Seq. | y                | y <sup>++</sup> | y*               | y* <sup>++</sup> | y <sup>0</sup> | y <sup>0++</sup> | #  |
|----|-----------------|-----------------|-----------------|------------------|------------------|------------------|------|------------------|-----------------|------------------|------------------|----------------|------------------|----|
| 1  | 102.0550        | 51.5311         |                 |                  | 84.0444          | 42.5258          | T    |                  |                 |                  |                  |                |                  | 15 |
| 2  | <b>203.1026</b> | 102.0550        |                 |                  | 185.0921         | 93.0497          | T    | 1622.8788        | 811.9430        | 1605.8523        | 803.4298         | 1604.8682      | 802.9378         | 14 |
| 3  | 350.1710        | 175.5892        |                 |                  | <b>332.1605</b>  | 166.5839         | F    | 1521.8311        | 761.4192        | 1504.8046        | 752.9059         | 1503.8206      | 752.4139         | 13 |
| 4  | <b>478.2296</b> | 239.6185        | 461.2031        | 231.1052         | 460.2191         | 230.6132         | Q    | <b>1374.7627</b> | <b>687.8850</b> | <b>1357.7362</b> | 679.3717         | 1356.7521      | 678.8797         | 12 |
| 5  | 592.2726        | 296.6399        | <b>575.2460</b> | 288.1266         | 574.2620         | 287.6346         | N    | <b>1246.7041</b> | 623.8557        | 1229.6776        | 615.3424         | 1228.6936      | 614.8504         | 11 |
| 6  | <b>705.3566</b> | 353.1819        | <b>688.3301</b> | 344.6687         | 687.3461         | 344.1767         | L    | <b>1132.6612</b> | 566.8342        | 1115.6347        | 558.3210         | 1114.6506      | 557.8290         | 10 |
| 7  | 818.4407        | 409.7240        | 801.4141        | 401.2107         | 800.4301         | 400.7187         | I    | <b>1019.5771</b> | 510.2922        | 1002.5506        | 501.7789         | 1001.5666      | 501.2869         | 9  |
| 8  | 947.4833        | 474.2453        | 930.4567        | 465.7320         | 929.4727         | 465.2400         | E    | <b>906.4931</b>  | 453.7502        | 889.4665         | 445.2369         | 888.4825       | <b>444.7449</b>  | 8  |
| 9  | 1004.5047       | 502.7560        | 987.4782        | 494.2427         | 986.4942         | 493.7507         | G    | <b>777.4505</b>  | 389.2289        | 760.4239         | 380.7156         | 759.4399       | 380.2236         | 7  |
| 10 | 1151.5731       | 576.2902        | 1134.5466       | 567.7769         | <b>1133.5626</b> | 567.2849         | F    | 720.4290         | 360.7182        | 703.4025         | 352.2049         | 702.4185       | 351.7129         | 6  |
| 11 | 1280.6157       | 640.8115        | 1263.5892       | 632.2982         | 1262.6052        | 631.8062         | E    | 573.3606         | 287.1839        | 556.3341         | 278.6707         | 555.3501       | 278.1787         | 5  |
| 12 | 1351.6528       | 676.3301        | 1334.6263       | 667.8168         | 1333.6423        | 667.3248         | A    | <b>444.3180</b>  | 222.6627        | 427.2915         | 214.1494         |                |                  | 4  |
| 13 | 1464.7369       | 732.8721        | 1447.7103       | 724.3588         | 1446.7263        | 723.8668         | L    | <b>373.2809</b>  | 187.1441        | 356.2544         | 178.6308         |                |                  | 3  |
| 14 | 1577.8210       | 789.4141        | 1560.7944       | 780.9008         | 1559.8104        | 780.4088         | L    | <b>260.1969</b>  | 130.6021        | 243.1703         | 122.0888         |                |                  | 2  |
| 15 |                 |                 |                 |                  |                  |                  | K    | <b>147.1128</b>  | 74.0600         | 130.0863         | 65.5468          |                |                  | 1  |

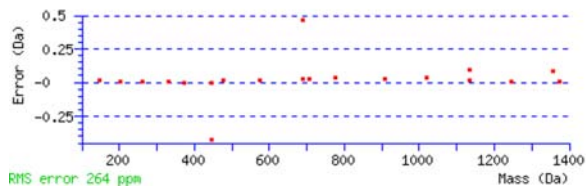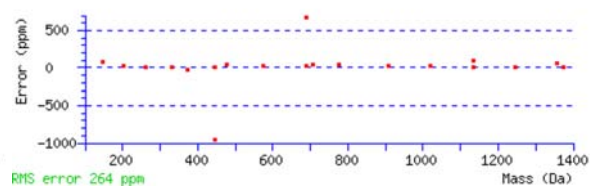

## Peptide View

MS/MS Fragmentation of **TVAGGAWTYNTTSAVTVK**

Found in [gi|6677785|ref|NP\\_033110.1](#), ribosomal protein L37a [Mus musculus]

Match to Query 602: 1825.979048 from(913.996800,2+)

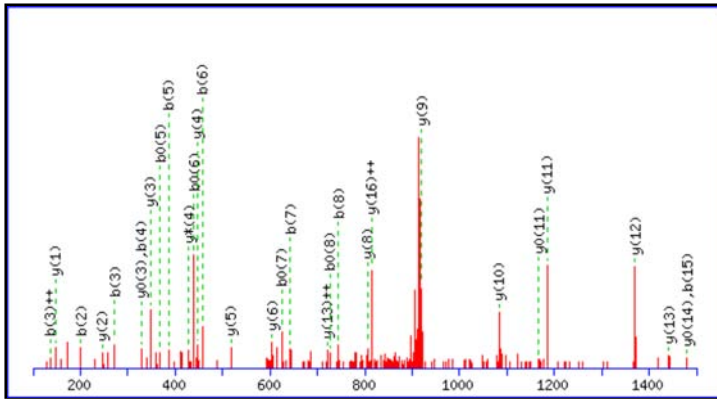

Monoisotopic mass of neutral peptide  $M_r(\text{calc})$ : 1825.9210

Ions Score: 55 Expect: 0.0087

Matches (**Bold Red**): 31/182 fragment ions using 77 most intense peaks

| #  | b                | b <sup>++</sup> | b*        | b* <sup>++</sup> | b <sup>0</sup>  | b <sup>0++</sup> | Seq. | y                | y <sup>++</sup> | y*              | y* <sup>++</sup> | y <sup>0</sup>   | y <sup>0++</sup> | #  |
|----|------------------|-----------------|-----------|------------------|-----------------|------------------|------|------------------|-----------------|-----------------|------------------|------------------|------------------|----|
| 1  | 102.0550         | 51.5311         |           |                  | 84.0444         | 42.5258          | T    |                  |                 |                 |                  |                  |                  | 18 |
| 2  | <b>201.1234</b>  | 101.0653        |           |                  | 183.1128        | 92.0600          | V    | 1725.8806        | 863.4439        | 1708.8541       | 854.9307         | 1707.8700        | 854.4387         | 17 |
| 3  | <b>272.1605</b>  | <b>136.5839</b> |           |                  | 254.1499        | 127.5786         | A    | 1626.8122        | <b>813.9097</b> | 1609.7856       | 805.3965         | 1608.8016        | 804.9045         | 16 |
| 4  | <b>329.1819</b>  | 165.0946        |           |                  | 311.1714        | 156.0893         | G    | 1555.7751        | 778.3912        | 1538.7485       | 769.8779         | 1537.7645        | 769.3859         | 15 |
| 5  | <b>386.2034</b>  | 193.6053        |           |                  | <b>368.1928</b> | 184.6001         | G    | 1498.7536        | 749.8804        | 1481.7271       | 741.3672         | <b>1480.7431</b> | 740.8752         | 14 |
| 6  | <b>457.2405</b>  | 229.1239        |           |                  | <b>439.2299</b> | 220.1186         | A    | <b>1441.7322</b> | <b>721.3697</b> | 1424.7056       | 712.8564         | 1423.7216        | 712.3644         | 13 |
| 7  | <b>643.3198</b>  | 322.1635        |           |                  | <b>625.3093</b> | 313.1583         | W    | <b>1370.6951</b> | 685.8512        | 1353.6685       | 677.3379         | 1352.6845        | 676.8459         | 12 |
| 8  | <b>744.3675</b>  | 372.6874        |           |                  | <b>726.3569</b> | 363.6821         | T    | <b>1184.6157</b> | 592.8115        | 1167.5892       | 584.2982         | <b>1166.6052</b> | 583.8062         | 11 |
| 9  | 907.4308         | 454.2191        |           |                  | 889.4203        | 445.2138         | Y    | <b>1083.5681</b> | 542.2877        | 1066.5415       | 533.7744         | 1065.5575        | 533.2824         | 10 |
| 10 | 1021.4738        | 511.2405        | 1004.4472 | 502.7272         | 1003.4632       | 502.2352         | N    | <b>920.5047</b>  | 460.7560        | 903.4782        | 452.2427         | 902.4942         | 451.7507         | 9  |
| 11 | 1122.5214        | 561.7644        | 1105.4949 | 553.2511         | 1104.5109       | 552.7591         | T    | <b>806.4618</b>  | 403.7345        | 789.4353        | 395.2213         | 788.4512         | 394.7293         | 8  |
| 12 | 1223.5691        | 612.2882        | 1206.5426 | 603.7749         | 1205.5586       | 603.2829         | T    | 705.4141         | 353.2107        | 688.3876        | 344.6974         | 687.4036         | 344.2054         | 7  |
| 13 | 1310.6011        | 655.8042        | 1293.5746 | 647.2909         | 1292.5906       | 646.7989         | S    | <b>604.3664</b>  | 302.6869        | 587.3399        | 294.1736         | 586.3559         | 293.6816         | 6  |
| 14 | 1381.6383        | 691.3228        | 1364.6117 | 682.8095         | 1363.6277       | 682.3175         | A    | <b>517.3344</b>  | 259.1708        | 500.3079        | 250.6576         | 499.3238         | 250.1656         | 5  |
| 15 | <b>1480.7067</b> | 740.8570        | 1463.6801 | 732.3437         | 1462.6961       | 731.8517         | V    | <b>446.2973</b>  | 223.6523        | <b>429.2708</b> | 215.1390         | 428.2867         | 214.6470         | 4  |
| 16 | 1581.7543        | 791.3808        | 1564.7278 | 782.8675         | 1563.7438       | 782.3755         | T    | <b>347.2289</b>  | 174.1181        | 330.2023        | 165.6048         | <b>329.2183</b>  | 165.1128         | 3  |
| 17 | 1680.8228        | 840.9150        | 1663.7962 | 832.4017         | 1662.8122       | 831.9097         | V    | <b>246.1812</b>  | 123.5942        | 229.1547        | 115.0810         |                  |                  | 2  |
| 18 |                  |                 |           |                  |                 |                  | K    | <b>147.1128</b>  | 74.0600         | 130.0863        | 65.5468          |                  |                  | 1  |

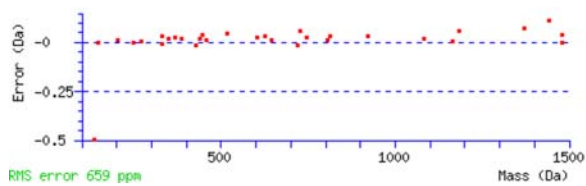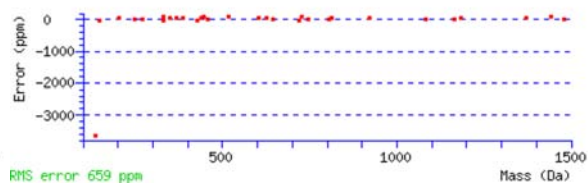

## Peptide View

MS/MS Fragmentation of **VIHDNFGIVEGLMTTVHAITATQK**

Found in [gi|41054968|ref|NP\\_955766.1](#), glyceraldehyde-3-phosphate dehydrogenase (phosphorylating)-like [Mus musculus]

Match to Query 622: 2594.463072 from(865.828300,3+)

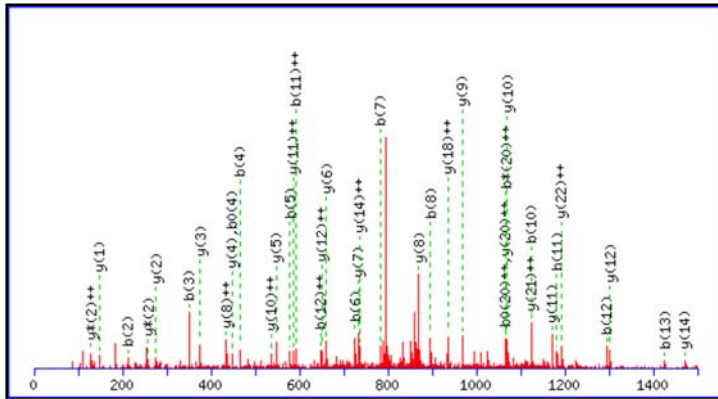

Monoisotopic mass of neutral peptide Mr(calc): 2594.3526

Ions Score: 98 Expect: 1.2e-006

Matches (Bold Red): 40/258 fragment ions using 67 most intense peaks

| #  | b                | b <sup>++</sup> | b*        | b* <sup>++</sup> | b <sup>0</sup>  | b <sup>0++</sup> | Seq. | y                | y <sup>++</sup>  | y*              | y* <sup>++</sup> | y <sup>0</sup> | y <sup>0++</sup> | #  |
|----|------------------|-----------------|-----------|------------------|-----------------|------------------|------|------------------|------------------|-----------------|------------------|----------------|------------------|----|
| 1  | 100.0757         | 50.5415         |           |                  |                 |                  | V    |                  |                  |                 |                  |                |                  | 24 |
| 2  | <b>213.1597</b>  | 107.0835        |           |                  |                 |                  | I    | 2496.2915        | 1248.6494        | 2479.2649       | 1240.1361        | 2478.2809      | 1239.6441        | 23 |
| 3  | <b>350.2187</b>  | 175.6130        |           |                  |                 |                  | H    | 2383.2074        | <b>1192.1073</b> | 2366.1809       | 1183.5941        | 2365.1968      | 1183.1021        | 22 |
| 4  | <b>465.2456</b>  | 233.1264        |           |                  | <b>447.2350</b> | 224.1212         | D    | 2246.1485        | <b>1123.5779</b> | 2229.1220       | 1115.0646        | 2228.1379      | 1114.5726        | 21 |
| 5  | <b>579.2885</b>  | 290.1479        | 562.2620  | 281.6346         | 561.2780        | 281.1426         | N    | 2131.1216        | <b>1066.0644</b> | 2114.0950       | 1057.5511        | 2113.1110      | 1057.0591        | 20 |
| 6  | <b>726.3569</b>  | 363.6821        | 709.3304  | 355.1688         | 708.3464        | 354.6768         | F    | 2017.0786        | 1009.0430        | 2000.0521       | 1000.5297        | 1999.0681      | 1000.0377        | 19 |
| 7  | <b>783.3784</b>  | 392.1928        | 766.3518  | 383.6796         | 765.3678        | 383.1876         | G    | 1870.0102        | <b>935.5087</b>  | 1852.9837       | 926.9955         | 1851.9997      | 926.5035         | 18 |
| 8  | <b>896.4625</b>  | 448.7349        | 879.4359  | 440.2216         | 878.4519        | 439.7296         | I    | 1812.9888        | 906.9980         | 1795.9622       | 898.4847         | 1794.9782      | 897.9927         | 17 |
| 9  | 995.5309         | 498.2691        | 978.5043  | 489.7558         | 977.5203        | 489.2638         | V    | 1699.9047        | 850.4560         | 1682.8782       | 841.9427         | 1681.8941      | 841.4507         | 16 |
| 10 | <b>1124.5735</b> | 562.7904        | 1107.5469 | 554.2771         | 1106.5629       | 553.7851         | E    | 1600.8363        | 800.9218         | 1583.8097       | 792.4085         | 1582.8257      | 791.9165         | 15 |
| 11 | <b>1181.5949</b> | <b>591.3011</b> | 1164.5684 | 582.7878         | 1163.5844       | 582.2958         | G    | <b>1471.7937</b> | <b>736.4005</b>  | 1454.7672       | 727.8872         | 1453.7831      | 727.3952         | 14 |
| 12 | <b>1294.6790</b> | <b>647.8431</b> | 1277.6524 | 639.3299         | 1276.6684       | 638.8378         | L    | 1414.7722        | 707.8898         | 1397.7457       | 699.3765         | 1396.7617      | 698.8845         | 13 |
| 13 | <b>1425.7195</b> | 713.3634        | 1408.6929 | 704.8501         | 1407.7089       | 704.3581         | M    | <b>1301.6882</b> | <b>651.3477</b>  | 1284.6616       | 642.8345         | 1283.6776      | 642.3424         | 12 |
| 14 | 1526.7671        | 763.8872        | 1509.7406 | 755.3739         | 1508.7566       | 754.8819         | T    | <b>1170.6477</b> | <b>585.8275</b>  | 1153.6212       | 577.3142         | 1152.6371      | 576.8222         | 11 |
| 15 | 1627.8148        | 814.4110        | 1610.7883 | 805.8978         | 1609.8043       | 805.4058         | T    | <b>1069.6000</b> | <b>535.3036</b>  | 1052.5735       | 526.7904         | 1051.5895      | 526.2984         | 10 |
| 16 | 1726.8832        | 863.9453        | 1709.8567 | 855.4320         | 1708.8727       | 854.9400         | V    | <b>968.5523</b>  | 484.7798         | 951.5258        | 476.2665         | 950.5418       | 475.7745         | 9  |
| 17 | 1863.9421        | 932.4747        | 1846.9156 | 923.9614         | 1845.9316       | 923.4694         | H    | <b>869.4839</b>  | <b>435.2456</b>  | 852.4574        | 426.7323         | 851.4734       | 426.2403         | 8  |
| 18 | 1934.9792        | 967.9933        | 1917.9527 | 959.4800         | 1916.9687       | 958.9880         | A    | <b>732.4250</b>  | 366.7161         | 715.3985        | 358.2029         | 714.4145       | 357.7109         | 7  |
| 19 | 2048.0633        | 1024.5353       | 2031.0368 | 1016.0220        | 2030.0527       | 1015.5300        | I    | <b>661.3879</b>  | 331.1976         | 644.3614        | 322.6843         | 643.3773       | 322.1923         | 6  |
| 20 | 2149.1110        | 1075.0591       | 2132.0844 | <b>1066.5459</b> | 2131.1004       | <b>1066.0538</b> | T    | <b>548.3039</b>  | 274.6556         | 531.2773        | 266.1423         | 530.2933       | 265.6503         | 5  |
| 21 | 2220.1481        | 1110.5777       | 2203.1215 | 1102.0644        | 2202.1375       | 1101.5724        | A    | <b>447.2562</b>  | 224.1317         | 430.2296        | 215.6184         | 429.2456       | 215.1264         | 4  |
| 22 | 2321.1958        | 1161.1015       | 2304.1692 | 1152.5883        | 2303.1852       | 1152.0962        | T    | <b>376.2191</b>  | 188.6132         | 359.1925        | 180.0999         | 358.2085       | 179.6079         | 3  |
| 23 | 2449.2544        | 1225.1308       | 2432.2278 | 1216.6175        | 2431.2438       | 1216.1255        | Q    | <b>275.1714</b>  | 138.0893         | <b>258.1448</b> | <b>129.5761</b>  |                |                  | 2  |
| 24 |                  |                 |           |                  |                 |                  | K    | <b>147.1128</b>  | 74.0600          | 130.0863        | 65.5468          |                |                  | 1  |

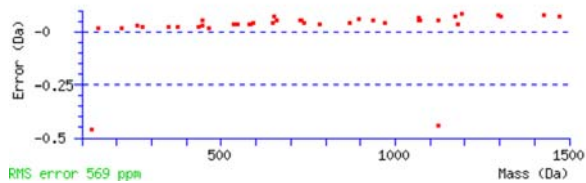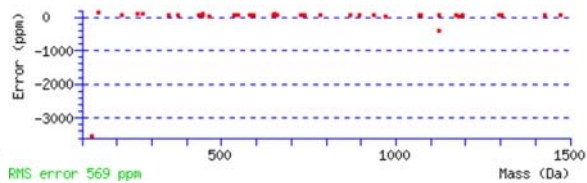



## Peptide View

MS/MS Fragmentation of **VINIFQSNLFQALIDIQEFYEVTLDDNPK**

Found in [gi|82965034|ref|XP\\_929204.1](#), PREDICTED: similar to discs large homolog 1 isoform 6 [Mus musculus]

Match to Query 764: 3423.992172 from(1142.338000,3+)

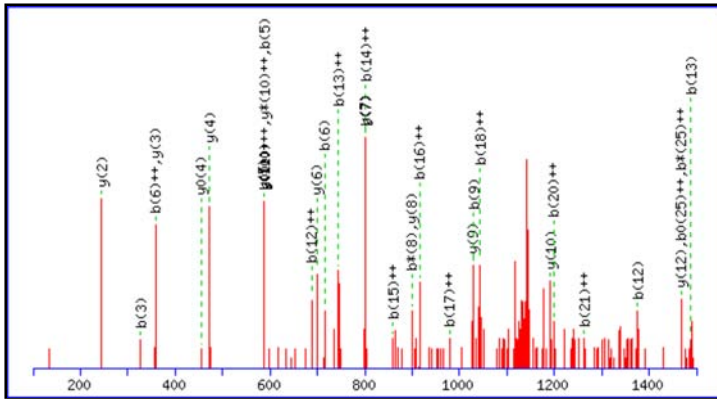

Monoisotopic mass of neutral peptide  $M_r(\text{calc})$ : 3423.7965

Ions Score: 60 Expect: 0.013

Matches (Bold Red): 34/314 fragment ions using 67 most intense peaks

| #  | b                | b <sup>++</sup>  | b*              | b* <sup>++</sup> | b <sup>0</sup> | b <sup>0++</sup> | Seq. | y                | y <sup>++</sup> | y*        | y* <sup>++</sup> | y <sup>0</sup>  | y <sup>0++</sup> | #  |
|----|------------------|------------------|-----------------|------------------|----------------|------------------|------|------------------|-----------------|-----------|------------------|-----------------|------------------|----|
| 1  | 100.0757         | 50.5415          |                 |                  |                |                  | V    |                  |                 |           |                  |                 |                  | 29 |
| 2  | 213.1597         | 107.0835         |                 |                  |                |                  | I    | 3325.7354        | 1663.3713       | 3308.7089 | 1654.8581        | 3307.7249       | 1654.3661        | 28 |
| 3  | <b>327.2027</b>  | 164.1050         | 310.1761        | 155.5917         |                |                  | N    | 3212.6514        | 1606.8293       | 3195.6248 | 1598.3160        | 3194.6408       | 1597.8240        | 27 |
| 4  | 440.2867         | 220.6470         | 423.2602        | 212.1337         |                |                  | I    | 3098.6084        | 1549.8079       | 3081.5819 | 1541.2946        | 3080.5979       | 1540.8026        | 26 |
| 5  | <b>587.3551</b>  | 294.1812         | 570.3286        | 285.6679         |                |                  | F    | 2985.5244        | 1493.2658       | 2968.4978 | 1484.7525        | 2967.5138       | 1484.2605        | 25 |
| 6  | <b>715.4137</b>  | <b>358.2105</b>  | 698.3872        | 349.6972         |                |                  | Q    | 2838.4560        | 1419.7316       | 2821.4294 | 1411.2183        | 2820.4454       | 1410.7263        | 24 |
| 7  | <b>802.4458</b>  | 401.7265         | 785.4192        | 393.2132         | 784.4352       | 392.7212         | S    | 2710.3974        | 1355.7023       | 2693.3708 | 1347.1891        | 2692.3868       | 1346.6970        | 23 |
| 8  | 916.4887         | 458.7480         | <b>899.4621</b> | 450.2347         | 898.4781       | 449.7427         | N    | 2623.3654        | 1312.1863       | 2606.3388 | 1303.6730        | 2605.3548       | 1303.1810        | 22 |
| 9  | <b>1029.5727</b> | 515.2900         | 1012.5462       | 506.7767         | 1011.5622      | 506.2847         | L    | 2509.3224        | 1255.1648       | 2492.2959 | 1246.6516        | 2491.3119       | 1246.1596        | 21 |
| 10 | 1176.6412        | <b>588.8242</b>  | 1159.6146       | 580.3109         | 1158.6306      | 579.8189         | F    | 2396.2384        | 1198.6228       | 2379.2118 | 1190.1095        | 2378.2278       | 1189.6175        | 20 |
| 11 | 1304.6997        | 652.8535         | 1287.6732       | 644.3402         | 1286.6892      | 643.8482         | Q    | 2249.1700        | 1125.0886       | 2232.1434 | 1116.5753        | 2231.1594       | 1116.0833        | 19 |
| 12 | <b>1375.7368</b> | <b>688.3721</b>  | 1358.7103       | 679.8588         | 1357.7263      | 679.3668         | A    | 2121.1114        | 1061.0593       | 2104.0848 | 1052.5460        | 2103.1008       | 1052.0540        | 18 |
| 13 | <b>1488.8209</b> | <b>744.9141</b>  | 1471.7944       | 736.4008         | 1470.8103      | 735.9088         | L    | 2050.0743        | 1025.5408       | 2033.0477 | 1017.0275        | 2032.0637       | 1016.5355        | 17 |
| 14 | 1601.9050        | <b>801.4561</b>  | 1584.8784       | 792.9428         | 1583.8944      | 792.4508         | I    | 1936.9902        | 968.9987        | 1919.9637 | 960.4855         | 1918.9796       | 959.9935         | 16 |
| 15 | 1716.9319        | <b>858.9696</b>  | 1699.9054       | 850.4563         | 1698.9213      | 849.9643         | D    | 1823.9061        | 912.4567        | 1806.8796 | 903.9434         | 1805.8956       | 903.4514         | 15 |
| 16 | 1830.0160        | <b>915.5116</b>  | 1812.9894       | 906.9983         | 1812.0054      | 906.5063         | I    | 1708.8792        | 854.9432        | 1691.8527 | 846.4300         | 1690.8686       | 845.9380         | 14 |
| 17 | 1958.0745        | <b>979.5409</b>  | 1941.0480       | 971.0276         | 1940.0640      | 970.5356         | Q    | 1595.7951        | 798.4012        | 1578.7686 | 789.8879         | 1577.7846       | 789.3959         | 13 |
| 18 | 2087.1171        | <b>1044.0622</b> | 2070.0906       | 1035.5489        | 2069.1066      | 1035.0569        | E    | <b>1467.7366</b> | 734.3719        | 1450.7100 | 725.8586         | 1449.7260       | 725.3666         | 12 |
| 19 | 2234.1855        | 1117.5964        | 2217.1590       | 1109.0831        | 2216.1750      | 1108.5911        | F    | 1338.6940        | 669.8506        | 1321.6674 | 661.3373         | 1320.6834       | 660.8453         | 11 |
| 20 | 2397.2489        | <b>1199.1281</b> | 2380.2223       | 1190.6148        | 2379.2383      | 1190.1228        | Y    | <b>1191.6256</b> | 596.3164        | 1174.5990 | <b>587.8031</b>  | 1173.6150       | <b>587.3111</b>  | 10 |
| 21 | 2526.2915        | <b>1263.6494</b> | 2509.2649       | 1255.1361        | 2508.2809      | 1254.6441        | E    | <b>1028.5622</b> | 514.7848        | 1011.5357 | 506.2715         | 1010.5517       | 505.7795         | 9  |
| 22 | 2625.3599        | 1313.1836        | 2608.3333       | 1304.6703        | 2607.3493      | 1304.1783        | V    | <b>899.5196</b>  | 450.2635        | 882.4931  | 441.7502         | 881.5091        | 441.2582         | 8  |
| 23 | 2726.4076        | 1363.7074        | 2709.3810       | 1355.1941        | 2708.3970      | 1354.7021        | T    | <b>800.4512</b>  | 400.7293        | 783.4247  | 392.2160         | 782.4407        | 391.7240         | 7  |
| 24 | 2839.4916        | 1420.2494        | 2822.4651       | 1411.7362        | 2821.4811      | 1411.2442        | L    | <b>699.4036</b>  | 350.2054        | 682.3770  | 341.6921         | 681.3930        | 341.2001         | 6  |
| 25 | 2952.5757        | 1476.7915        | 2935.5491       | <b>1468.2782</b> | 2934.5651      | <b>1467.7862</b> | L    | <b>586.3195</b>  | 293.6634        | 569.2929  | 285.1501         | 568.3089        | 284.6581         | 5  |
| 26 | 3067.6026        | 1534.3049        | 3050.5761       | 1525.7917        | 3049.5921      | 1525.2997        | D    | <b>473.2354</b>  | 237.1214        | 456.2089  | 228.6081         | <b>455.2249</b> | 228.1161         | 4  |
| 27 | 3181.6455        | 1591.3264        | 3164.6190       | 1582.8131        | 3163.6350      | 1582.3211        | N    | <b>358.2085</b>  | 179.6079        | 341.1819  | 171.0946         |                 |                  | 3  |
| 28 | 3278.6983        | 1639.8528        | 3261.6718       | 1631.3395        | 3260.6877      | 1630.8475        | P    | <b>244.1656</b>  | 122.5864        | 227.1390  | 114.0731         |                 |                  | 2  |
| 29 |                  |                  |                 |                  |                |                  | K    | 147.1128         | 74.0600         | 130.0863  | 65.5468          |                 |                  | 1  |

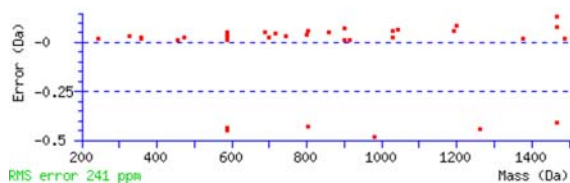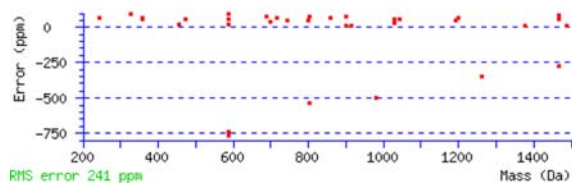



## Peptide View

MS/MS Fragmentation of **VLALIQAWADAFR**

Found in [gi|84875524|ref|NP\\_001034181.1](#), target of myb1-like 2 isoform b [Mus musculus]

Match to Query 307: 1472.888048 from(737.451300,2+)

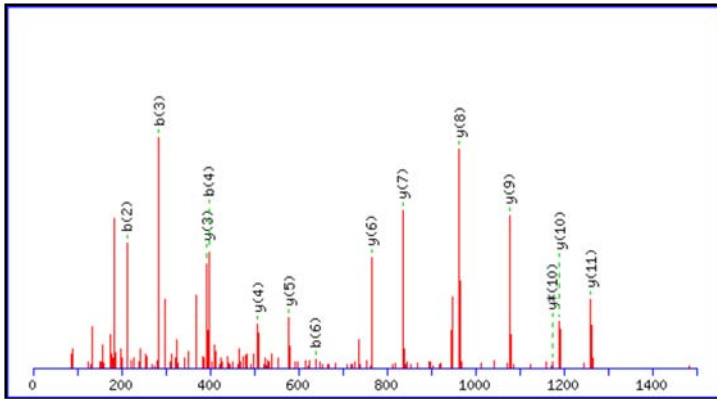

Monoisotopic mass of neutral peptide  $M_r(\text{calc})$ : 1472.8139

Ions Score: 63 Expect: 0.00093

Matches (**Bold Red**): 14/110 fragment ions using 28 most intense peaks

| #  | b               | b <sup>++</sup> | b*        | b* <sup>++</sup> | b <sup>0</sup> | b <sup>0++</sup> | Seq. | y                | y <sup>++</sup> | y*               | y* <sup>++</sup> | y <sup>0</sup> | y <sup>0++</sup> | #  |
|----|-----------------|-----------------|-----------|------------------|----------------|------------------|------|------------------|-----------------|------------------|------------------|----------------|------------------|----|
| 1  | 100.0757        | 50.5415         |           |                  |                |                  | V    |                  |                 |                  |                  |                |                  | 13 |
| 2  | <b>213.1597</b> | 107.0835        |           |                  |                |                  | L    | 1374.7528        | 687.8800        | 1357.7263        | 679.3668         | 1356.7422      | 678.8748         | 12 |
| 3  | <b>284.1969</b> | 142.6021        |           |                  |                |                  | A    | <b>1261.6688</b> | 631.3380        | 1244.6422        | 622.8247         | 1243.6582      | 622.3327         | 11 |
| 4  | <b>397.2809</b> | 199.1441        |           |                  |                |                  | L    | <b>1190.6316</b> | 595.8195        | <b>1173.6051</b> | 587.3062         | 1172.6211      | 586.8142         | 10 |
| 5  | 510.3650        | 255.6861        |           |                  |                |                  | I    | <b>1077.5476</b> | 539.2774        | 1060.5210        | 530.7642         | 1059.5370      | 530.2721         | 9  |
| 6  | <b>638.4236</b> | 319.7154        | 621.3970  | 311.2021         |                |                  | Q    | <b>964.4635</b>  | 482.7354        | 947.4370         | 474.2221         | 946.4530       | 473.7301         | 8  |
| 7  | 709.4607        | 355.2340        | 692.4341  | 346.7207         |                |                  | A    | <b>836.4049</b>  | 418.7061        | 819.3784         | 410.1928         | 818.3944       | 409.7008         | 7  |
| 8  | 895.5400        | 448.2736        | 878.5134  | 439.7604         |                |                  | W    | <b>765.3678</b>  | 383.1876        | 748.3413         | 374.6743         | 747.3573       | 374.1823         | 6  |
| 9  | 966.5771        | 483.7922        | 949.5505  | 475.2789         |                |                  | A    | <b>579.2885</b>  | 290.1479        | 562.2620         | 281.6346         | 561.2780       | 281.1426         | 5  |
| 10 | 1081.6040       | 541.3057        | 1064.5775 | 532.7924         | 1063.5935      | 532.3004         | D    | <b>508.2514</b>  | 254.6293        | 491.2249         | 246.1161         | 490.2408       | 245.6241         | 4  |
| 11 | 1152.6411       | 576.8242        | 1135.6146 | 568.3109         | 1134.6306      | 567.8189         | A    | <b>393.2245</b>  | 197.1159        | 376.1979         | 188.6026         |                |                  | 3  |
| 12 | 1299.7095       | 650.3584        | 1282.6830 | 641.8451         | 1281.6990      | 641.3531         | F    | 322.1874         | 161.5973        | 305.1608         | 153.0840         |                |                  | 2  |
| 13 |                 |                 |           |                  |                |                  | R    | 175.1190         | 88.0631         | 158.0924         | 79.5498          |                |                  | 1  |

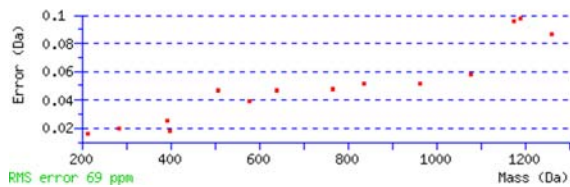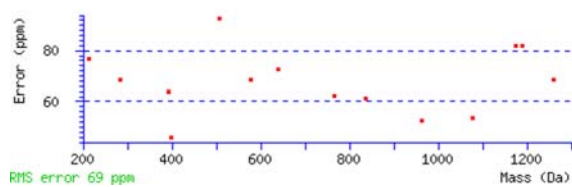

## Peptide View

MS/MS Fragmentation of **VLNLIQSWADFR**

Found in [gi|94378129|ref|XP\\_001003823.1](#), PREDICTED: similar to Target of Myb protein 1 isoform 6 [Mus musculus]

Match to Query 481: 1531.844048 from(766.929300,2+)

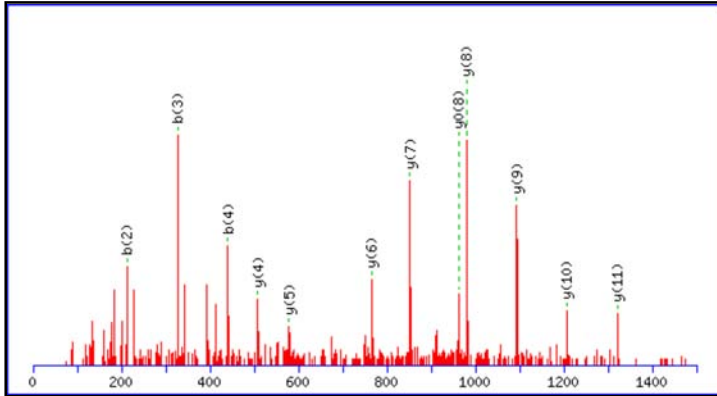

Monoisotopic mass of neutral peptide  $M_r(\text{calc})$ : 1531.8147

Ions Score: 71 Expect: 0.00014

Matches (**Bold Red**): 12/122 fragment ions using 19 most intense peaks

| #  | b               | b <sup>++</sup> | b*        | b* <sup>++</sup> | b <sup>0</sup> | b <sup>0++</sup> | Seq. | y                | y <sup>++</sup> | y*        | y* <sup>++</sup> | y <sup>0</sup>  | y <sup>0++</sup> | #  |
|----|-----------------|-----------------|-----------|------------------|----------------|------------------|------|------------------|-----------------|-----------|------------------|-----------------|------------------|----|
| 1  | 100.0757        | 50.5415         |           |                  |                |                  | V    |                  |                 |           |                  |                 |                  | 13 |
| 2  | <b>213.1597</b> | 107.0835        |           |                  |                |                  | L    | 1433.7536        | 717.3804        | 1416.7270 | 708.8671         | 1415.7430       | 708.3751         | 12 |
| 3  | <b>327.2027</b> | 164.1050        | 310.1761  | 155.5917         |                |                  | N    | <b>1320.6695</b> | 660.8384        | 1303.6429 | 652.3251         | 1302.6589       | 651.8331         | 11 |
| 4  | <b>440.2867</b> | 220.6470        | 423.2602  | 212.1337         |                |                  | L    | <b>1206.6266</b> | 603.8169        | 1189.6000 | 595.3036         | 1188.6160       | 594.8116         | 10 |
| 5  | 553.3708        | 277.1890        | 536.3442  | 268.6758         |                |                  | I    | <b>1093.5425</b> | 547.2749        | 1076.5160 | 538.7616         | 1075.5319       | 538.2696         | 9  |
| 6  | 681.4294        | 341.2183        | 664.4028  | 332.7051         |                |                  | Q    | <b>980.4584</b>  | 490.7329        | 963.4319  | 482.2196         | <b>962.4479</b> | 481.7276         | 8  |
| 7  | 768.4614        | 384.7343        | 751.4349  | 376.2211         | 750.4508       | 375.7291         | S    | <b>852.3999</b>  | 426.7036        | 835.3733  | 418.1903         | 834.3893        | 417.6983         | 7  |
| 8  | 954.5407        | 477.7740        | 937.5142  | 469.2607         | 936.5302       | 468.7687         | W    | <b>765.3678</b>  | 383.1876        | 748.3413  | 374.6743         | 747.3573        | 374.1823         | 6  |
| 9  | 1025.5778       | 513.2926        | 1008.5513 | 504.7793         | 1007.5673      | 504.2873         | A    | <b>579.2885</b>  | 290.1479        | 562.2620  | 281.6346         | 561.2780        | 281.1426         | 5  |
| 10 | 1140.6048       | 570.8060        | 1123.5782 | 562.2927         | 1122.5942      | 561.8007         | D    | <b>508.2514</b>  | 254.6293        | 491.2249  | 246.1161         | 490.2408        | 245.6241         | 4  |
| 11 | 1211.6419       | 606.3246        | 1194.6153 | 597.8113         | 1193.6313      | 597.3193         | A    | 393.2245         | 197.1159        | 376.1979  | 188.6026         |                 |                  | 3  |
| 12 | 1358.7103       | 679.8588        | 1341.6837 | 671.3455         | 1340.6997      | 670.8535         | F    | 322.1874         | 161.5973        | 305.1608  | 153.0840         |                 |                  | 2  |
| 13 |                 |                 |           |                  |                |                  | R    | 175.1190         | 88.0631         | 158.0924  | 79.5498          |                 |                  | 1  |

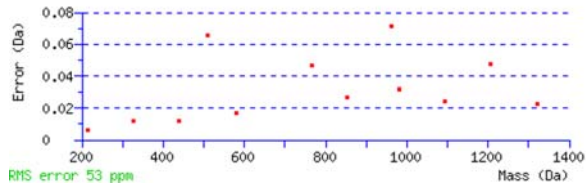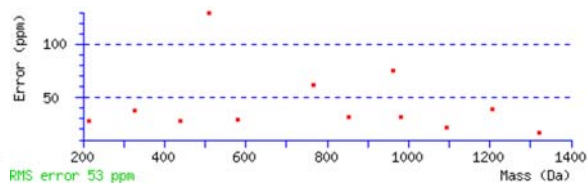

## Peptide View

### MS/MS Fragmentation of **VTLYDPMGILTSVQTK**

Found in [gi|56699423|ref|NP\\_035020.2](#), neural precursor cell expressed, developmentally down-regulated gene 4 [Mus musculus]

Match to Query 624: 1851.970848 from(926.992700,2+)

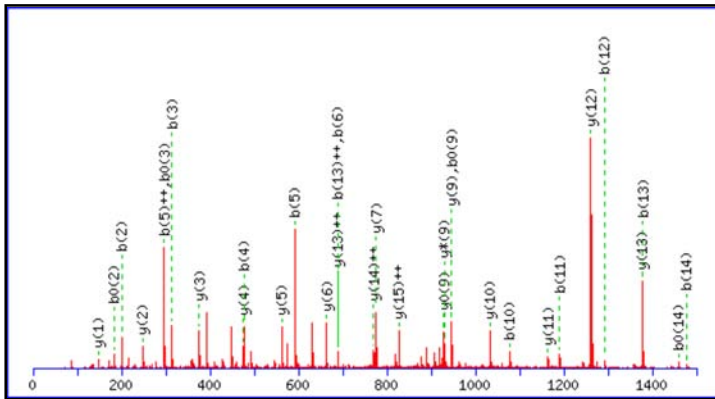

Monoisotopic mass of neutral peptide  $M_r(\text{calc})$ : 1851.9652

Ions Score: 85 Expect:  $1e-005$

Matches (**Bold Red**): 33/160 fragment ions using 53 most intense peaks

| #  | b                | b <sup>++</sup> | b*        | b* <sup>++</sup> | b <sup>0</sup>   | b <sup>0++</sup> | Seq. | y                | y <sup>++</sup> | y*              | y* <sup>++</sup> | y <sup>0</sup>  | y <sup>0++</sup> | #  |
|----|------------------|-----------------|-----------|------------------|------------------|------------------|------|------------------|-----------------|-----------------|------------------|-----------------|------------------|----|
| 1  | 100.0757         | 50.5415         |           |                  |                  |                  | V    |                  |                 |                 |                  |                 |                  | 17 |
| 2  | <b>201.1234</b>  | 101.0653        |           |                  | <b>183.1128</b>  | 92.0600          | T    | 1753.9040        | 877.4557        | 1736.8775       | 868.9424         | 1735.8935       | 868.4504         | 16 |
| 3  | <b>314.2074</b>  | 157.6074        |           |                  | <b>296.1969</b>  | 148.6021         | L    | 1652.8564        | <b>826.9318</b> | 1635.8298       | 818.4185         | 1634.8458       | 817.9265         | 15 |
| 4  | <b>477.2708</b>  | 239.1390        |           |                  | 459.2602         | 230.1337         | Y    | 1539.7723        | <b>770.3898</b> | 1522.7458       | 761.8765         | 1521.7617       | 761.3845         | 14 |
| 5  | <b>592.2977</b>  | <b>296.6525</b> |           |                  | 574.2871         | 287.6472         | D    | <b>1376.7090</b> | <b>688.8581</b> | 1359.6824       | 680.3448         | 1358.6984       | 679.8528         | 13 |
| 6  | <b>689.3505</b>  | 345.1789        |           |                  | 671.3399         | 336.1736         | P    | <b>1261.6820</b> | 631.3447        | 1244.6555       | 622.8314         | 1243.6715       | 622.3394         | 12 |
| 7  | 820.3909         | 410.6991        |           |                  | 802.3804         | 401.6938         | M    | <b>1164.6293</b> | 582.8183        | 1147.6027       | 574.3050         | 1146.6187       | 573.8130         | 11 |
| 8  | 907.4230         | 454.2151        |           |                  | 889.4124         | 445.2098         | S    | <b>1033.5888</b> | 517.2980        | 1016.5622       | 508.7848         | 1015.5782       | 508.2928         | 10 |
| 9  | 964.4444         | 482.7259        |           |                  | <b>946.4339</b>  | 473.7206         | G    | <b>946.5568</b>  | 473.7820        | <b>929.5302</b> | 465.2687         | <b>928.5462</b> | 464.7767         | 9  |
| 10 | <b>1077.5285</b> | 539.2679        |           |                  | 1059.5179        | 530.2626         | I    | 889.5353         | 445.2713        | 872.5088        | 436.7580         | 871.5247        | 436.2660         | 8  |
| 11 | <b>1190.6125</b> | 595.8099        |           |                  | 1172.6020        | 586.8046         | L    | <b>776.4512</b>  | 388.7293        | 759.4247        | 380.2160         | 758.4407        | 379.7240         | 7  |
| 12 | <b>1291.6602</b> | 646.3338        |           |                  | 1273.6497        | 637.3285         | T    | <b>663.3672</b>  | 332.1872        | 646.3406        | 323.6740         | 645.3566        | 323.1819         | 6  |
| 13 | <b>1378.6923</b> | <b>689.8498</b> |           |                  | 1360.6817        | 680.8445         | S    | <b>562.3195</b>  | 281.6634        | 545.2930        | 273.1501         | 544.3089        | 272.6581         | 5  |
| 14 | <b>1477.7607</b> | 739.3840        |           |                  | <b>1459.7501</b> | 730.3787         | V    | <b>475.2875</b>  | 238.1474        | 458.2609        | 229.6341         | 457.2769        | 229.1421         | 4  |
| 15 | 1605.8192        | 803.4133        | 1588.7927 | 794.9000         | 1587.8087        | 794.4080         | Q    | <b>376.2191</b>  | 188.6132        | 359.1925        | 180.0999         | 358.2085        | 179.6079         | 3  |
| 16 | 1706.8669        | 853.9371        | 1689.8404 | 845.4238         | 1688.8564        | 844.9318         | T    | <b>248.1605</b>  | 124.5839        | 231.1339        | 116.0706         | 230.1499        | 115.5786         | 2  |
| 17 |                  |                 |           |                  |                  |                  | K    | <b>147.1128</b>  | 74.0600         | 130.0863        | 65.5468          |                 |                  | 1  |

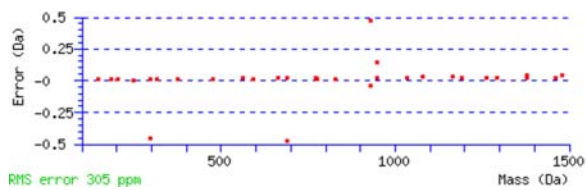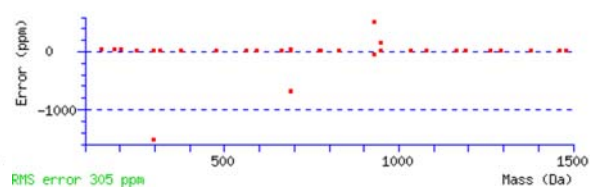

## Peptide View

MS/MS Fragmentation of **YGFSDPLTFNSVVELINHYR**

Found in [gi|33468921|ref|NP\\_035215.1](#), phosphatidylinositol 3-kinase, regulatory subunit, polypeptide 1 isoform b [*Mus musculus*]

Match to Query 822: 2370.364872 from(791.128900,3+)

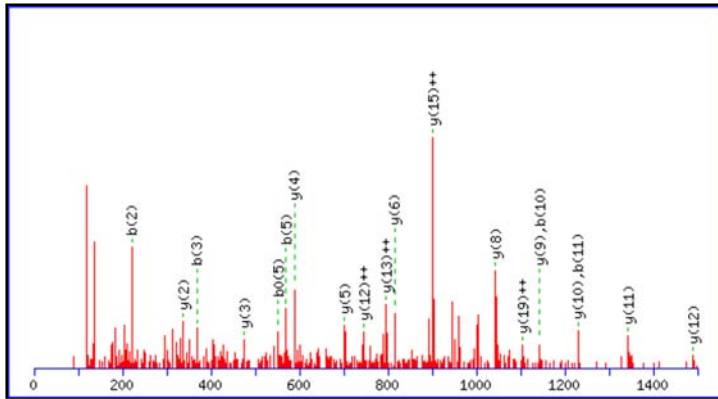

Monoisotopic mass of neutral peptide  $M_r(\text{calc})$ : 2370.1644

Ions Score: 58 Expect: 0.0096

Matches (**Bold Red**): 20/192 fragment ions using 34 most intense peaks

| #  | b                | b <sup>++</sup> | b*        | b* <sup>++</sup> | b <sup>0</sup>  | b <sup>0++</sup> | Seq. | y                | y <sup>++</sup>  | y*        | y* <sup>++</sup> | y <sup>0</sup> | y <sup>0++</sup> | #  |
|----|------------------|-----------------|-----------|------------------|-----------------|------------------|------|------------------|------------------|-----------|------------------|----------------|------------------|----|
| 1  | 164.0706         | 82.5389         |           |                  |                 |                  | Y    |                  |                  |           |                  |                |                  | 20 |
| 2  | <b>221.0921</b>  | 111.0497        |           |                  |                 |                  | G    | 2208.1084        | <b>1104.5578</b> | 2191.0818 | 1096.0445        | 2190.0978      | 1095.5525        | 19 |
| 3  | <b>368.1605</b>  | 184.5839        |           |                  |                 |                  | F    | 2151.0869        | 1076.0471        | 2134.0604 | 1067.5338        | 2133.0763      | 1067.0418        | 18 |
| 4  | 455.1925         | 228.0999        |           |                  | 437.1819        | 219.0946         | S    | 2004.0185        | 1002.5129        | 1986.9919 | 993.9996         | 1986.0079      | 993.5076         | 17 |
| 5  | <b>570.2194</b>  | 285.6134        |           |                  | <b>552.2089</b> | 276.6081         | D    | 1916.9865        | 958.9969         | 1899.9599 | 950.4836         | 1898.9759      | 949.9916         | 16 |
| 6  | 667.2722         | 334.1397        |           |                  | 649.2616        | 325.1345         | P    | 1801.9595        | <b>901.4834</b>  | 1784.9330 | 892.9701         | 1783.9490      | 892.4781         | 15 |
| 7  | 780.3563         | 390.6818        |           |                  | 762.3457        | 381.6765         | L    | 1704.9068        | 852.9570         | 1687.8802 | 844.4437         | 1686.8962      | 843.9517         | 14 |
| 8  | 881.4039         | 441.2056        |           |                  | 863.3934        | 432.2003         | T    | 1591.8227        | <b>796.4150</b>  | 1574.7962 | 787.9017         | 1573.8121      | 787.4097         | 13 |
| 9  | 1028.4724        | 514.7398        |           |                  | 1010.4618       | 505.7345         | F    | <b>1490.7750</b> | <b>745.8911</b>  | 1473.7485 | 737.3779         | 1472.7645      | 736.8859         | 12 |
| 10 | <b>1142.5153</b> | 571.7613        | 1125.4887 | 563.2480         | 1124.5047       | 562.7560         | N    | <b>1343.7066</b> | 672.3569         | 1326.6801 | 663.8437         | 1325.6960      | 663.3517         | 11 |
| 11 | <b>1229.5473</b> | 615.2773        | 1212.5208 | 606.7640         | 1211.5368       | 606.2720         | S    | <b>1229.6637</b> | 615.3355         | 1212.6371 | 606.8222         | 1211.6531      | 606.3302         | 10 |
| 12 | 1328.6157        | 664.8115        | 1311.5892 | 656.2982         | 1310.6052       | 655.8062         | V    | <b>1142.6317</b> | 571.8195         | 1125.6051 | 563.3062         | 1124.6211      | 562.8142         | 9  |
| 13 | 1427.6841        | 714.3457        | 1410.6576 | 705.8324         | 1409.6736       | 705.3404         | V    | <b>1043.5632</b> | 522.2853         | 1026.5367 | 513.7720         | 1025.5527      | 513.2800         | 8  |
| 14 | 1556.7267        | 778.8670        | 1539.7002 | 770.3537         | 1538.7162       | 769.8617         | E    | 944.4948         | 472.7511         | 927.4683  | 464.2378         | 926.4843       | 463.7458         | 7  |
| 15 | 1669.8108        | 835.4090        | 1652.7842 | 826.8958         | 1651.8002       | 826.4037         | L    | <b>815.4522</b>  | 408.2298         | 798.4257  | 399.7165         |                |                  | 6  |
| 16 | 1782.8948        | 891.9511        | 1765.8683 | 883.4378         | 1764.8843       | 882.9458         | I    | <b>702.3682</b>  | 351.6877         | 685.3416  | 343.1745         |                |                  | 5  |
| 17 | 1896.9378        | 948.9725        | 1879.9112 | 940.4593         | 1878.9272       | 939.9672         | N    | <b>589.2841</b>  | 295.1457         | 572.2576  | 286.6324         |                |                  | 4  |
| 18 | 2033.9967        | 1017.5020       | 2016.9701 | 1008.9887        | 2015.9861       | 1008.4967        | H    | <b>475.2412</b>  | 238.1242         | 458.2146  | 229.6110         |                |                  | 3  |
| 19 | 2197.0600        | 1099.0336       | 2180.0335 | 1090.5204        | 2179.0495       | 1090.0284        | Y    | <b>338.1823</b>  | 169.5948         | 321.1557  | 161.0815         |                |                  | 2  |
| 20 |                  |                 |           |                  |                 |                  | R    | 175.1190         | 88.0631          | 158.0924  | 79.5498          |                |                  | 1  |

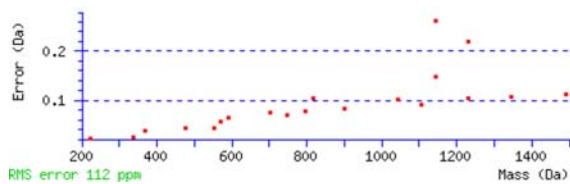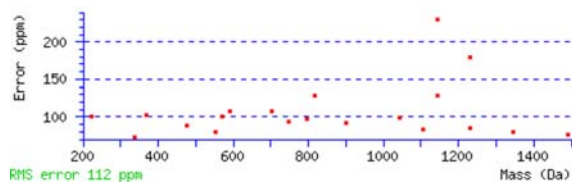

## Peptide View

MS/MS Fragmentation of **YMDLQLVIEVFQK**

Found in [gi|46560563|ref|NP\\_035495.2](#), SH3 domain protein 1B [Mus musculus]

Match to Query 416: 1739.943048 from(870.978800,2+)

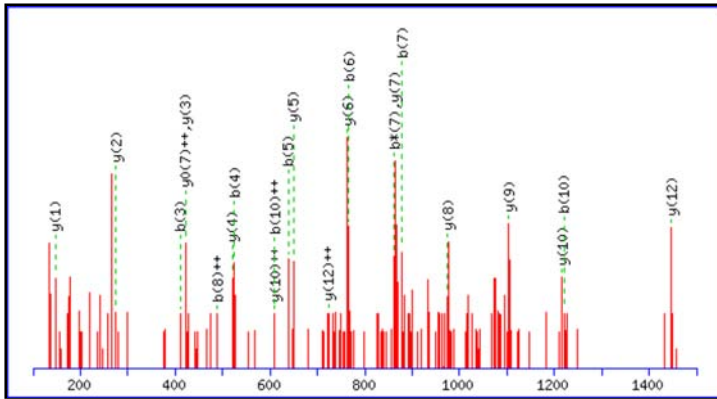

Monoisotopic mass of neutral peptide  $M_r(\text{calc})$ : 1739.8804

Ions Score: 50 Expect: 0.025

Matches (**Bold Red**): 23/134 fragment ions using 53 most intense peaks

| #  | b                | b <sup>++</sup> | b*              | b* <sup>++</sup> | b <sup>0</sup> | b <sup>0++</sup> | Seq. | y                | y <sup>++</sup> | y*        | y* <sup>++</sup> | y <sup>0</sup> | y <sup>0++</sup> | #  |
|----|------------------|-----------------|-----------------|------------------|----------------|------------------|------|------------------|-----------------|-----------|------------------|----------------|------------------|----|
| 1  | 164.0706         | 82.5389         |                 |                  |                |                  | Y    |                  |                 |           |                  |                |                  | 14 |
| 2  | 295.1111         | 148.0592        |                 |                  |                |                  | M    | 1577.8243        | 789.4158        | 1560.7978 | 780.9025         | 1559.8138      | 780.4105         | 13 |
| 3  | <b>410.1380</b>  | 205.5727        |                 |                  | 392.1275       | 196.5674         | D    | <b>1446.7838</b> | <b>723.8956</b> | 1429.7573 | 715.3823         | 1428.7733      | 714.8903         | 12 |
| 4  | <b>525.1650</b>  | 263.0861        |                 |                  | 507.1544       | 254.0808         | D    | 1331.7569        | 666.3821        | 1314.7304 | 657.8688         | 1313.7463      | 657.3768         | 11 |
| 5  | <b>638.2490</b>  | 319.6282        |                 |                  | 620.2385       | 310.6229         | L    | <b>1216.7300</b> | <b>608.8686</b> | 1199.7034 | 600.3553         | 1198.7194      | 599.8633         | 10 |
| 6  | <b>766.3076</b>  | 383.6574        | 749.2811        | 375.1442         | 748.2970       | 374.6522         | Q    | <b>1103.6459</b> | 552.3266        | 1086.6194 | 543.8133         | 1085.6353      | 543.3213         | 9  |
| 7  | <b>879.3917</b>  | 440.1995        | <b>862.3651</b> | 431.6862         | 861.3811       | 431.1942         | L    | <b>975.5873</b>  | 488.2973        | 958.5608  | 479.7840         | 957.5768       | 479.2920         | 8  |
| 8  | 978.4601         | <b>489.7337</b> | 961.4335        | 481.2204         | 960.4495       | 480.7284         | V    | <b>862.5033</b>  | 431.7553        | 845.4767  | 423.2420         | 844.4927       | <b>422.7500</b>  | 7  |
| 9  | 1091.5441        | 546.2757        | 1074.5176       | 537.7624         | 1073.5336      | 537.2704         | I    | <b>763.4349</b>  | 382.2211        | 746.4083  | 373.7078         | 745.4243       | 373.2158         | 6  |
| 10 | <b>1220.5867</b> | <b>610.7970</b> | 1203.5602       | 602.2837         | 1202.5762      | 601.7917         | E    | <b>650.3508</b>  | 325.6790        | 633.3242  | 317.1658         | 632.3402       | 316.6738         | 5  |
| 11 | 1319.6551        | 660.3312        | 1302.6286       | 651.8179         | 1301.6446      | 651.3259         | V    | <b>521.3082</b>  | 261.1577        | 504.2817  | 252.6445         |                |                  | 4  |
| 12 | 1466.7235        | 733.8654        | 1449.6970       | 725.3521         | 1448.7130      | 724.8601         | F    | <b>422.2398</b>  | 211.6235        | 405.2132  | 203.1103         |                |                  | 3  |
| 13 | 1594.7821        | 797.8947        | 1577.7556       | 789.3814         | 1576.7716      | 788.8894         | Q    | <b>275.1714</b>  | 138.0893        | 258.1448  | 129.5761         |                |                  | 2  |
| 14 |                  |                 |                 |                  |                |                  | K    | <b>147.1128</b>  | 74.0600         | 130.0863  | 65.5468          |                |                  | 1  |

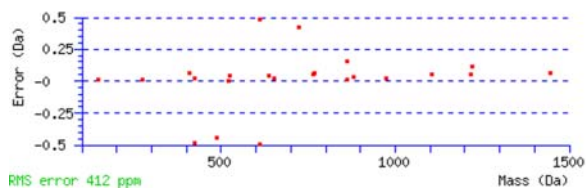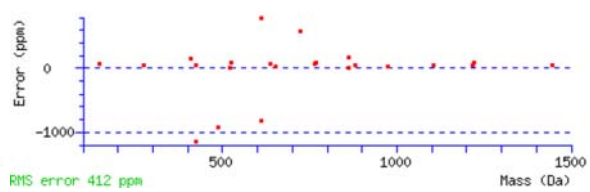

## Peptide View

MS/MS Fragmentation of **YTAVGQLVQDLLTQVR**

Found in [gi|21703974|ref|NP\\_663470.1](#), Ras and Rab interactor 1 [Mus musculus]

Match to Query 1016: 1803.110648 from(902.562600,2+)

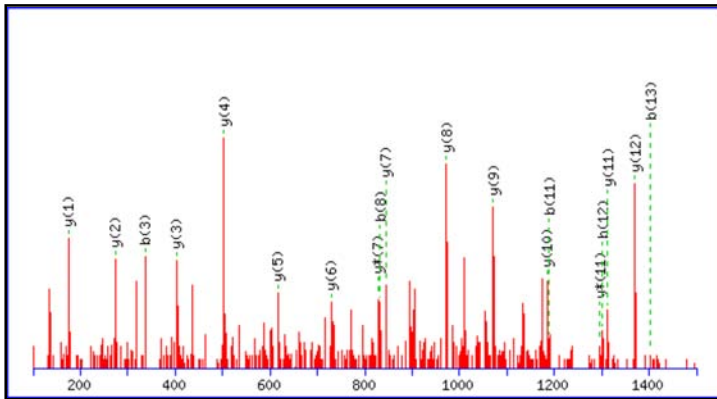

Monoisotopic mass of neutral peptide  $M_r(\text{calc})$ : 1802.9890

Ions Score: 78 Expect: 6.6e-005

Matches (**Bold Red**): 19/162 fragment ions using 34 most intense peaks

| #  | b                | b <sup>++</sup> | b*        | b* <sup>++</sup> | b <sup>0</sup> | b <sup>0++</sup> | Seq. | y                | y <sup>++</sup> | y*               | y* <sup>++</sup> | y <sup>0</sup> | y <sup>0++</sup> | #  |
|----|------------------|-----------------|-----------|------------------|----------------|------------------|------|------------------|-----------------|------------------|------------------|----------------|------------------|----|
| 1  | 164.0706         | 82.5389         |           |                  |                |                  | Y    |                  |                 |                  |                  |                |                  | 16 |
| 2  | 265.1183         | 133.0628        |           |                  | 247.1077       | 124.0575         | T    | 1640.9330        | 820.9701        | 1623.9064        | 812.4568         | 1622.9224      | 811.9648         | 15 |
| 3  | <b>336.1554</b>  | 168.5813        |           |                  | 318.1448       | 159.5761         | A    | 1539.8853        | 770.4463        | 1522.8587        | 761.9330         | 1521.8747      | 761.4410         | 14 |
| 4  | 435.2238         | 218.1155        |           |                  | 417.2132       | 209.1103         | V    | 1468.8482        | 734.9277        | 1451.8216        | 726.4145         | 1450.8376      | 725.9224         | 13 |
| 5  | 492.2453         | 246.6263        |           |                  | 474.2347       | 237.6210         | G    | <b>1369.7798</b> | 685.3935        | 1352.7532        | 676.8802         | 1351.7692      | 676.3882         | 12 |
| 6  | 620.3038         | 310.6556        | 603.2773  | 302.1423         | 602.2933       | 301.6503         | Q    | <b>1312.7583</b> | 656.8828        | <b>1295.7318</b> | 648.3695         | 1294.7477      | 647.8775         | 11 |
| 7  | 733.3879         | 367.1976        | 716.3614  | 358.6843         | 715.3773       | 358.1923         | L    | <b>1184.6997</b> | 592.8535        | 1167.6732        | 584.3402         | 1166.6892      | 583.8482         | 10 |
| 8  | <b>832.4563</b>  | 416.7318        | 815.4298  | 408.2185         | 814.4458       | 407.7265         | V    | <b>1071.6157</b> | 536.3115        | 1054.5891        | 527.7982         | 1053.6051      | 527.3062         | 9  |
| 9  | 960.5149         | 480.7611        | 943.4883  | 472.2478         | 942.5043       | 471.7558         | Q    | <b>972.5473</b>  | 486.7773        | 955.5207         | 478.2640         | 954.5367       | 477.7720         | 8  |
| 10 | 1075.5418        | 538.2746        | 1058.5153 | 529.7613         | 1057.5313      | 529.2693         | D    | <b>844.4887</b>  | 422.7480        | <b>827.4621</b>  | 414.2347         | 826.4781       | 413.7427         | 7  |
| 11 | <b>1188.6259</b> | 594.8166        | 1171.5993 | 586.3033         | 1170.6153      | 585.8113         | L    | <b>729.4617</b>  | 365.2345        | 712.4352         | 356.7212         | 711.4512       | 356.2292         | 6  |
| 12 | <b>1301.7100</b> | 651.3586        | 1284.6834 | 642.8453         | 1283.6994      | 642.3533         | L    | <b>616.3777</b>  | 308.6925        | 599.3511         | 300.1792         | 598.3671       | 299.6872         | 5  |
| 13 | <b>1402.7576</b> | 701.8825        | 1385.7311 | 693.3692         | 1384.7471      | 692.8772         | T    | <b>503.2936</b>  | 252.1504        | 486.2671         | 243.6372         | 485.2831       | 243.1452         | 4  |
| 14 | 1530.8162        | 765.9117        | 1513.7897 | 757.3985         | 1512.8057      | 756.9065         | Q    | <b>402.2459</b>  | 201.6266        | 385.2194         | 193.1133         |                |                  | 3  |
| 15 | 1629.8846        | 815.4460        | 1612.8581 | 806.9327         | 1611.8741      | 806.4407         | V    | <b>274.1874</b>  | 137.5973        | 257.1608         | 129.0840         |                |                  | 2  |
| 16 |                  |                 |           |                  |                |                  | R    | <b>175.1190</b>  | 88.0631         | 158.0924         | 79.5498          |                |                  | 1  |

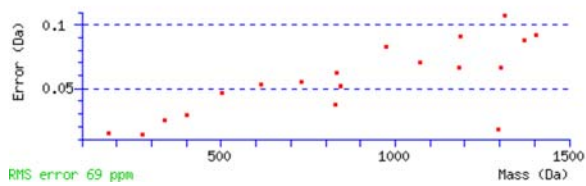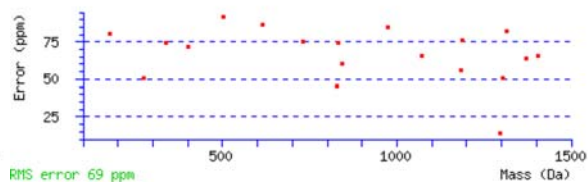



## Peptide View

MS/MS Fragmentation of **YVQFLSGLLSGAMK**

Found in [gi|94389897|ref|XP\\_109868.6|](#), PREDICTED: tensin 3 [Mus musculus]

Match to Query 476: 1512.813848 from(757.414200,2+)

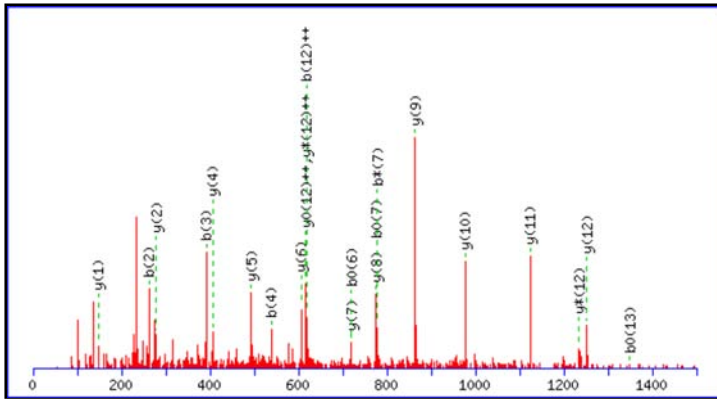

Monoisotopic mass of neutral peptide  $M_r(\text{calc})$ : 1512.8010

Ions Score: 68 Expect: 0.00029

Matches (**Bold Red**): 22/134 fragment ions using 52 most intense peaks

| #  | b               | b <sup>++</sup> | b*              | b <sup>*++</sup> | b <sup>0</sup>   | b <sup>0++</sup> | Seq. | y                | y <sup>++</sup> | y*               | y <sup>*++</sup> | y <sup>0</sup> | y <sup>0++</sup> | #  |
|----|-----------------|-----------------|-----------------|------------------|------------------|------------------|------|------------------|-----------------|------------------|------------------|----------------|------------------|----|
| 1  | 164.0706        | 82.5389         |                 |                  |                  |                  | Y    |                  |                 |                  |                  |                |                  | 14 |
| 2  | <b>263.1390</b> | 132.0731        |                 |                  |                  |                  | V    | 1350.7450        | 675.8761        | 1333.7184        | 667.3628         | 1332.7344      | 666.8708         | 13 |
| 3  | <b>391.1976</b> | 196.1024        | 374.1710        | 187.5892         |                  |                  | Q    | <b>1251.6765</b> | 626.3419        | <b>1234.6500</b> | <b>617.8286</b>  | 1233.6660      | <b>617.3366</b>  | 12 |
| 4  | <b>538.2660</b> | 269.6366        | 521.2395        | 261.1234         |                  |                  | F    | <b>1123.6180</b> | 562.3126        | 1106.5914        | 553.7993         | 1105.6074      | 553.3073         | 11 |
| 5  | 651.3501        | 326.1787        | 634.3235        | 317.6654         |                  |                  | L    | <b>976.5496</b>  | 488.7784        | 959.5230         | 480.2651         | 958.5390       | 479.7731         | 10 |
| 6  | 738.3821        | 369.6947        | 721.3555        | 361.1814         | <b>720.3715</b>  | 360.6894         | S    | <b>863.4655</b>  | 432.2364        | 846.4389         | 423.7231         | 845.4549       | 423.2311         | 9  |
| 7  | 795.4036        | 398.2054        | <b>778.3770</b> | 389.6921         | <b>777.3930</b>  | 389.2001         | G    | <b>776.4335</b>  | 388.7204        | 759.4069         | 380.2071         | 758.4229       | 379.7151         | 8  |
| 8  | 908.4876        | 454.7474        | 891.4611        | 446.2342         | 890.4771         | 445.7422         | L    | <b>719.4120</b>  | 360.2096        | 702.3855         | 351.6964         | 701.4014       | 351.2044         | 7  |
| 9  | 1021.5717       | 511.2895        | 1004.5451       | 502.7762         | 1003.5611        | 502.2842         | L    | <b>606.3279</b>  | 303.6676        | 589.3014         | 295.1543         | 588.3174       | 294.6623         | 6  |
| 10 | 1108.6037       | 554.8055        | 1091.5772       | 546.2922         | 1090.5931        | 545.8002         | S    | <b>493.2439</b>  | 247.1256        | 476.2173         | 238.6123         | 475.2333       | 238.1203         | 5  |
| 11 | 1165.6252       | 583.3162        | 1148.5986       | 574.8029         | 1147.6146        | 574.3109         | G    | <b>406.2119</b>  | 203.6096        | 389.1853         | 195.0963         |                |                  | 4  |
| 12 | 1236.6623       | <b>618.8348</b> | 1219.6357       | 610.3215         | 1218.6517        | 609.8295         | A    | 349.1904         | 175.0988        | 332.1638         | 166.5856         |                |                  | 3  |
| 13 | 1367.7028       | 684.3550        | 1350.6762       | 675.8417         | <b>1349.6922</b> | 675.3497         | M    | <b>278.1533</b>  | 139.5803        | 261.1267         | 131.0670         |                |                  | 2  |
| 14 |                 |                 |                 |                  |                  |                  | K    | <b>147.1128</b>  | 74.0600         | 130.0863         | 65.5468          |                |                  | 1  |

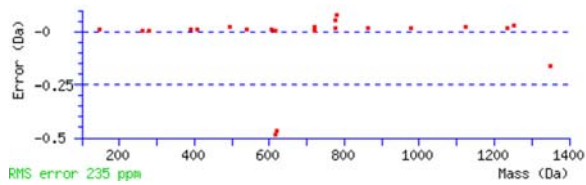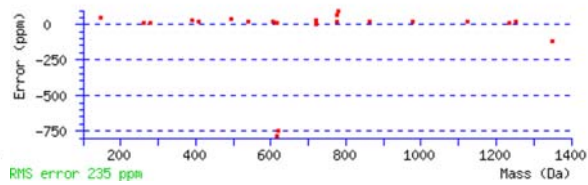

Supplement: pone.0013926.s013.pdf [file pone.0013926.s013.pdf]
