# Supplementary material for: Phosphoproteomics-Based Modeling Defines the Regulatory Mechanism Underlying Aberrant EGFR Signaling
Source: PubMed Central journal article supplement (PMC2978091; doi:10.1371/journal.pone.0013926), 2010-11-10
Supplement: pone.0013926.s003.pdf [file pone.0013926.s003.pdf]

Figure S3

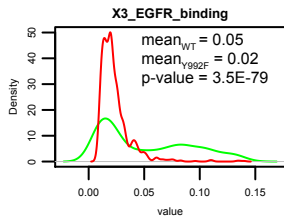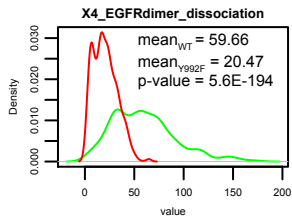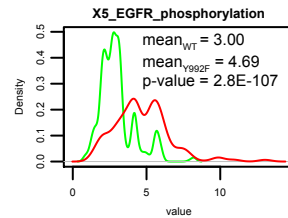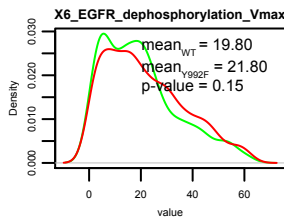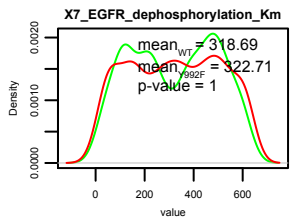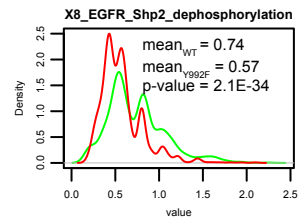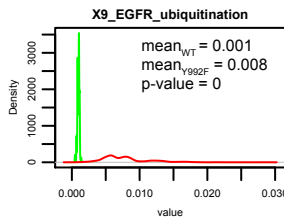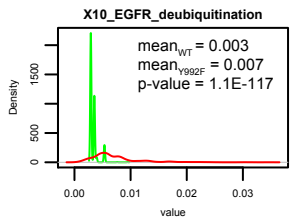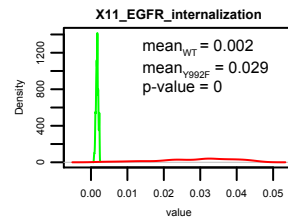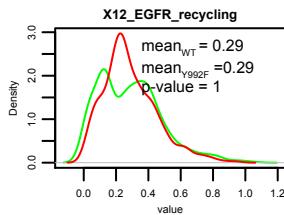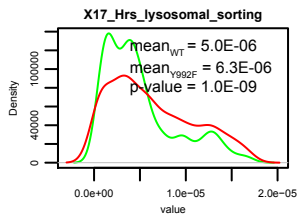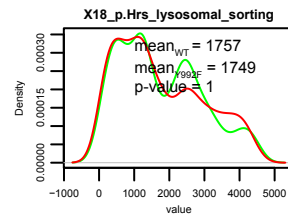

 WT model  
 Y992F model

# Figure S3 continued

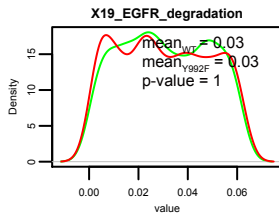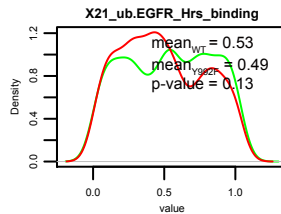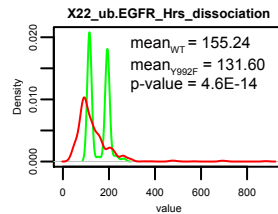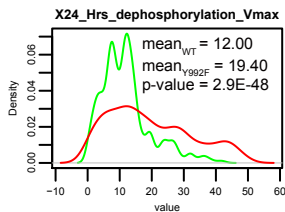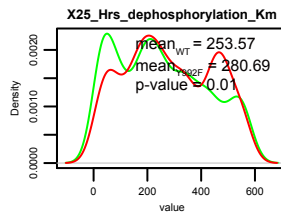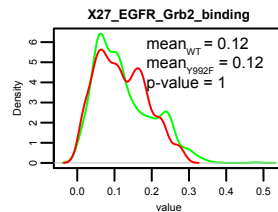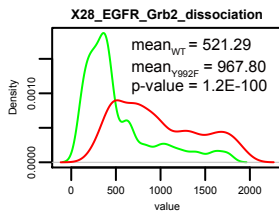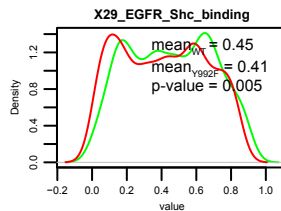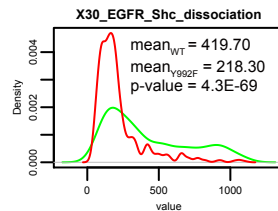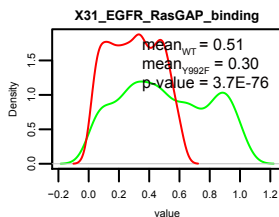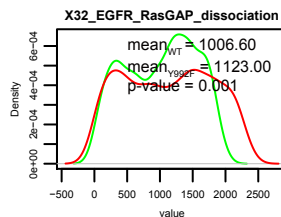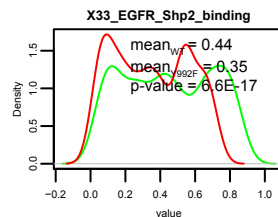

— WT model  
— Y992F model

# Figure S3 continued

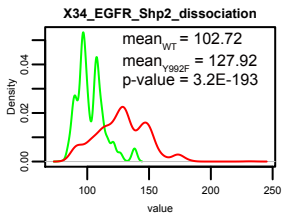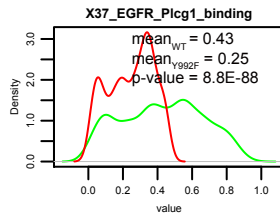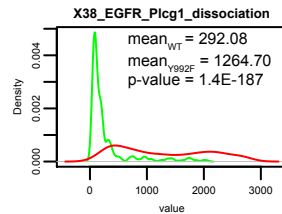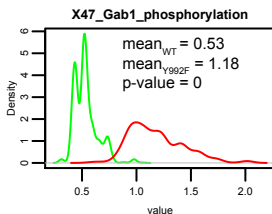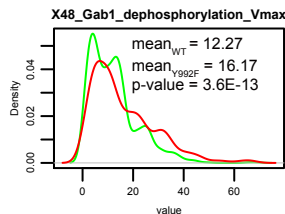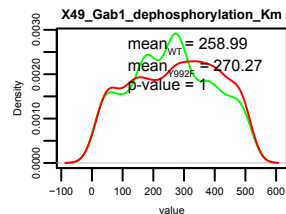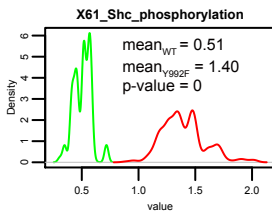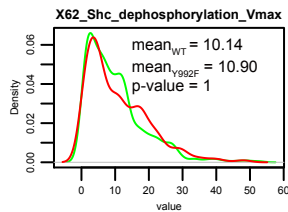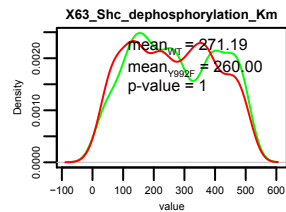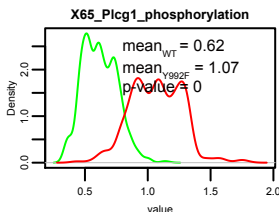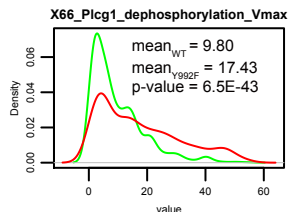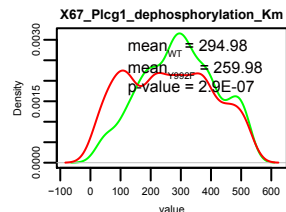

— WT model  
— Y992F model

# Figure S3 continued

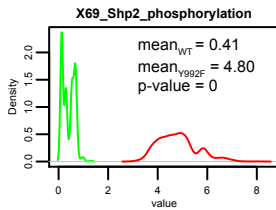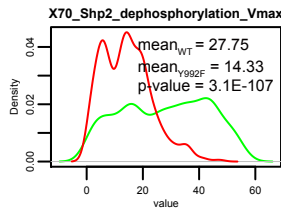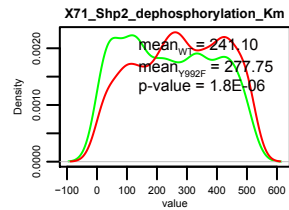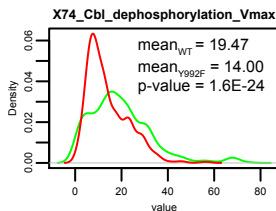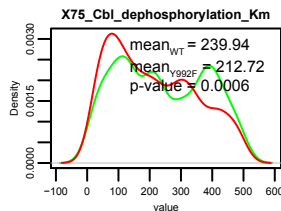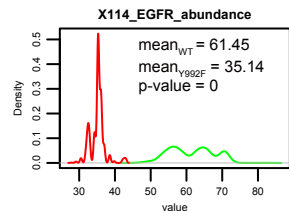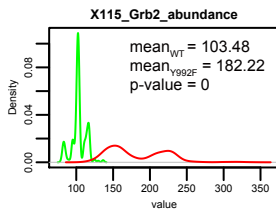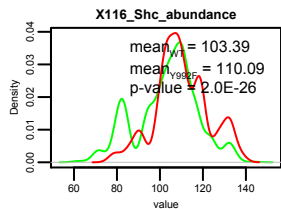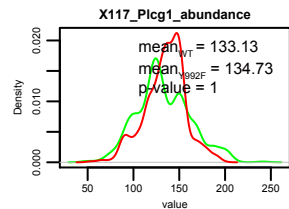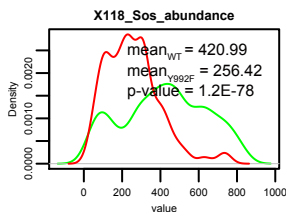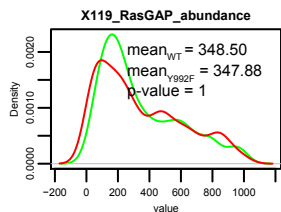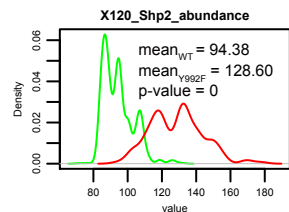

— WT model  
— Y992F model

# Figure S3 continued

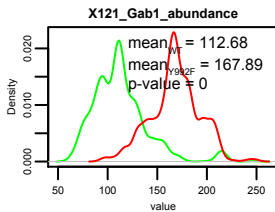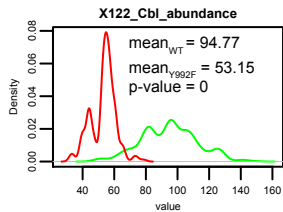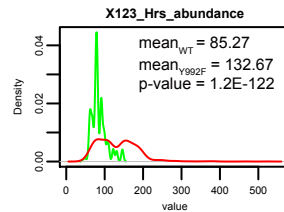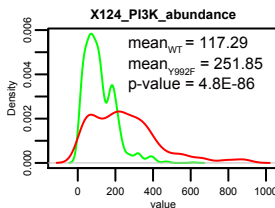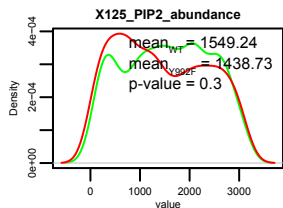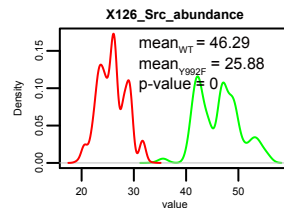

— WT model  
— Y992F model
